# Supplementary material for: Quantitative Phosphoproteomics of CXCL12 (SDF-1) Signaling
Source: PLoS One. 2011 Sep 20;6(9):e24918. doi: 10.1371/journal.pone.0024918 (PMC3176801; doi:10.1371/journal.pone.0024918)
Supplement: Table S2 — Detailed information from MaxQuant searches of CXCL12-responsive phosphopeptides. (XLS) [file pone.0024918.s002.xls]

## Sheet: Sheet1
																																												Table S2 - Detailed information from MaxQuant searches of CXCL12-responsive phosphopeptides
																																												CXCL12-responsive phosphosites taken from Table S1
Protein Group IDs	Positions	Position	Known Site	Peptide IDs	Mod. Peptide IDs	Best Localization Evidence ID	Best Localization MS/MS ID	Best Localization Raw File	Best Localization Scan Number	Best Identification Evidence ID	Best Identification MS/MS ID	Best Identification Raw File	Best Identification Scan Number	Proteins	Leading Proteins	Protein	Protein Names	Gene Names	Protein Descriptions	Uniprot	ENSEMBL	Pfam	Pfam Names	Pfam Descriptions	PDB	GOCC	GOCC Names	GOMF	GOMF Names	GOBP	GOBP Names	KEGG	KEGG Pathways	KEGG Pathway Names	KEGG Ortholog	Localization Prob	Score Diff	Localization Prob LS1a	Score Diff LS1a	PEP LS1a	Mascot Score LS1a	PTM Score LS1a	Localization Prob LS1b	Score Diff LS1b	PEP LS1b	Mascot Score LS1b	PTM Score LS1b	Localization Prob LS2	Score Diff LS2
12	573	573	Phosphoserine	7086	7828	27993	65155	o101004_RD463HCLSb_i45	3996	27986	65132	o100702_RD463HSLCi_47	6036	IPI00000030;IPI00219543;IPI00219544	IPI00000030	IPI00000030	Serine/threonine-protein phosphatase 2A 56 kDa regulatory subunit delta isoform;PP2A, B subunit, B' delta isoform;PP2A, B subunit, B56 delta isoform;PP2A, B subunit, PR61 delta isoform;PP2A, B subunit, R5 delta isoform;Serine/threonine-protein phosphatase 2A 56 kDa regulatory subunit delta isoform;PP2A, B subunit, B' delta isoform;PP2A, B subunit, B56 delta isoform;PP2A, B subunit, PR61 delta iso…	PPP2R5D;PPP2R5D;PPP2R5D	Isoform Delta-1 of Serine/threonine-protein phosphatase 2A 56 kDa regulatory subunit delta isoform;Isoform Delta-2 of Serine/threonine-protein phosphatase 2A 56 kDa regulatory subunit delta isoform;Isoform Delta-3 of Serine/threonine-protein phosphatase 2A	Q14738-1;Q14738;A8K6Y2;B4DSD7;B5BUA6;Q59EF0;Q14738-2;A8K3I9;Q14738-3	ENST00000230402;ENST00000394110;ENST00000230402;ENST00000394110;ENST00000230402;ENST00000394110	PF01603;PF01603;PF01603	B56;B56;B56	Protein phosphatase 2A regulatory B subunit (B56 family);Protein phosphatase 2A regulatory B subunit (B56 family);Protein phosphatase 2A regulatory B subunit (B56 family)		GO:0000159;GO:0005634;GO:0005737;GO:0008287;GO:0032991;GO:0043226;GO:0043227;GO:0043229;GO:0043231;GO:0043234;GO:0044424;GO:0044464;GO:0000159;GO:0005634;GO:0005737;GO:0008287;GO:0032991;GO:0043226;GO:0043227;GO:0043229;GO:0043231;GO:0043234;GO:0044424;GO:0044464;GO:0000159;GO:0005634;GO:0005737;GO:0008287;GO:0032991;GO:0043226;GO:0043227;GO:0043229;GO:0043231;GO:0043234;GO:0044424;GO:0044464	protein phosphatase type 2A complex;nucleus;cytoplasm;protein serine/threonine phosphatase complex;macromolecular complex;organelle;membrane-bounded organelle;intracellular organelle;intracellular membrane-bounded organelle;protein complex	GO:0005488;GO:0005515;GO:0008601;GO:0019208;GO:0019888;GO:0030234;GO:0005488;GO:0005515;GO:0008601;GO:0019208;GO:0019888;GO:0030234;GO:0005488;GO:0005515;GO:0008601;GO:0019208;GO:0019888;GO:0030234	binding;protein binding;protein phosphatase type 2A regulator activity;phosphatase regulator activity;protein phosphatase regulator activity;enzyme regulator activity;binding;protein binding;protein phosphatase type 2A regulator activity	GO:0007154;GO:0007165;GO:0007399;GO:0009987;GO:0032502;GO:0048731;GO:0048856;GO:0050789;GO:0050794;GO:0065007;GO:0007154;GO:0007165;GO:0007399;GO:0009987;GO:0032502;GO:0048731;GO:0048856;GO:0050789;GO:0050794;GO:0065007;GO:0007154;GO:0007165;GO:0007399;GO:0009987;GO:0032502;GO:0048731;GO:0048856;GO:0050789;GO:0050794;GO:0065007	cell communication;signal transduction;nervous system development;cellular process;developmental process;system development;anatomical structure development;regulation of biological process;regulation of cellular process;biological regulation	hsa:5528;hsa:5528;hsa:5528	ko04310	Wnt signaling pathway	K11584	1	105.507	0.999995	52.9041	0.0775238	31.77	58.94	1	74.3944	1.28364e-40	54.75	183.16	1	105.507
97	692	692		2340;2341	2559;2560	9121	21260	o100702_RD463HSLCi_43	8207	9119	21258	o101004_RD463HCLSb_i49	1107	IPI00002966	IPI00002966	IPI00002966	Heat shock 70 kDa protein 4;Heat shock 70-related protein APG-2;HSP70RY	HSPA4;APG2	Heat shock 70 kDa protein 4	P34932;B0AZS1;B0AZT0;B0AZU6;B4DH02;B4DIZ3;B4DN48;B4DSE8;B4DT47;B4DUS3;B4E0H6;B4E354;O14992;Q59GF8;Q7KYN0	ENST00000304858	PF00012	HSP70	Hsp70 protein		GO:0005737;GO:0044424;GO:0044464	cytoplasm;intracellular part;cell part	GO:0000166;GO:0001882;GO:0001883;GO:0005488;GO:0005524;GO:0017076;GO:0030554;GO:0032553;GO:0032555;GO:0032559	nucleotide binding;nucleoside binding;purine nucleoside binding;binding;ATP binding;purine nucleotide binding;adenyl nucleotide binding;ribonucleotide binding;purine ribonucleotide binding;adenyl ribonucleotide binding	GO:0006461;GO:0006950;GO:0006986;GO:0009607;GO:0009987;GO:0010033;GO:0010926;GO:0016043;GO:0022607;GO:0034619;GO:0034621;GO:0034622;GO:0042221;GO:0043623;GO:0043933;GO:0050896;GO:0051131;GO:0051789;GO:0065003;GO:0070096	protein complex assembly;response to stress;response to unfolded protein;response to biotic stimulus;cellular process;response to organic substance;anatomical structure formation;cellular component organization;cellular component assembly	hsa:3308	ko04612	Antigen processing and presentation	K09489	1	28.4617											1	59.2321
104	192	192	Phosphoserine	10387	11533	41256	96072	o101004_RD463HCLSb_i41	1398	41256	96072	o101004_RD463HCLSb_i41	1398	IPI00003377	IPI00003377	IPI00003377	Splicing factor, arginine/serine-rich 7;Splicing factor 9G8	SFRS7	Isoform 1 of Splicing factor, arginine/serine-rich 7	Q16629-1;Q16629;B4DLU6;Q564D3;Q8NB80	ENST00000313117;ENST00000378857;ENST00000378869	PF00076;PF00098	RRM_1;zf-CCHC	RNA recognition motif. (a.k.a. RRM, RBD, or RNP domain);Zinc knuckle	2HVZ	GO:0005634;GO:0043226;GO:0043227;GO:0043229;GO:0043231;GO:0044424;GO:0044464	nucleus;organelle;membrane-bounded organelle;intracellular organelle;intracellular membrane-bounded organelle;intracellular part;cell part	GO:0000166;GO:0003676;GO:0003723;GO:0005488;GO:0005515;GO:0008270;GO:0043167;GO:0043169;GO:0046872;GO:0046914	nucleotide binding;nucleic acid binding;RNA binding;binding;protein binding;zinc ion binding;ion binding;cation binding;metal ion binding;transition metal ion binding	GO:0000375;GO:0000377;GO:0000398;GO:0006139;GO:0006396;GO:0006397;GO:0006807;GO:0008152;GO:0008380;GO:0009987;GO:0016070;GO:0016071;GO:0034960;GO:0043170;GO:0043283;GO:0044237;GO:0044238;GO:0044260	RNA splicing, via transesterification reactions;RNA splicing, via transesterification reactions with bulged adenosine as nucleophile;nuclear mRNA splicing, via spliceosome;nucleobase, nucleoside, nucleotide and nucleic acid metabolic process	hsa:6432				0.999997	54.5812	0.999805	37.0987	0.0107232	26.29	97.769	0.999653	34.5999	0.11323	27.54	84.57	0.999997	54.5812
110	187	187	Phosphotyrosine	9522	10568	37597	87964	o101004_RD463HCLSb_i45	4848	37594	87954	o100702_RD463HSLCi_45	7158	IPI00003479;IPI00874012	IPI00003479	IPI00003479	Mitogen-activated protein kinase 1;Extracellular signal-regulated kinase 2;Mitogen-activated protein kinase 2;p42-MAPK;ERT1;Extracellular signal-regulated kinase-2 splice variant	MAPK1;ERK2;PRKM1;PRKM2	Mitogen-activated protein kinase 1;Extracellular signal-regulated kinase-2 splice variant	P28482;B4DHN0;Q1HBJ4;Q499G7;A8CZ64	ENST00000215832;ENST00000398822	PF00069;PF00069	Pkinase;Pkinase	Protein kinase domain;Protein kinase domain	1PME;1TVO;1WZY;2E14;2OJG;2OJI;2OJJ;3D42;3D44	GO:0005654;GO:0005829;GO:0005856;GO:0043226;GO:0043228;GO:0043229;GO:0043232;GO:0044422;GO:0044424;GO:0044428;GO:0044444;GO:0044446;GO:0044464	nucleoplasm;cytosol;cytoskeleton;organelle;non-membrane-bounded organelle;intracellular organelle;intracellular non-membrane-bounded organelle;organelle part;intracellular part;nuclear part;cytoplasmic part;intracellular organelle part;cell part	GO:0000166;GO:0001882;GO:0001883;GO:0005488;GO:0005524;GO:0017076;GO:0030554;GO:0032553;GO:0032555;GO:0032559;GO:0000166;GO:0001882;GO:0001883;GO:0003824;GO:0004672;GO:0004674;GO:0004702;GO:0004707;GO:0004871;GO:0005057;GO:0005488;GO:0005524;GO:0016301;GO:0016740;GO:0016772;GO:0016773;GO:0017076;GO:0030554;GO:0032553;GO:0032555;GO:0032559;GO:0060089	nucleotide binding;nucleoside binding;purine nucleoside binding;binding;ATP binding;purine nucleotide binding;adenyl nucleotide binding;ribonucleotide binding;purine ribonucleotide binding;adenyl ribonucleotide binding;nucleotide binding	GO:0006917;GO:0006935;GO:0007049;GO:0007154;GO:0007165;GO:0007242;GO:0007264;GO:0007265;GO:0007267;GO:0007268;GO:0007610;GO:0007626;GO:0009605;GO:0009987;GO:0010941;GO:0010942;GO:0012502;GO:0040011;GO:0042221;GO:0042330;GO:0042981;GO:0043065;GO:0043067;GO:0043068;GO:0044419;GO:0048518;GO:0048522;GO:0050789;GO:0050793;GO:0050794;GO:0050896;GO:0051094;GO:0051704;GO:0065007;GO:0006464;GO:0006468;GO:…	induction of apoptosis;chemotaxis;cell cycle;cell communication;signal transduction;intracellular signaling cascade;small GTPase mediated signal transduction;Ras protein signal transduction;cell-cell signaling;synaptic transmission;behavior	hsa:5594	ko04010;ko04013;ko04012;ko04350;ko04370;ko04150;ko04810;ko04510;ko04520;ko04540;ko04270;ko04910;ko04912;ko04914;ko04916;ko04620;ko04650;ko04660;ko04662;ko04664;ko04062;ko04720;ko04730;ko04320;ko04360;ko05200;ko05210;ko05212;ko05214;ko05216;ko05221;ko05220;ko05218;ko05211;ko05219;ko05215;ko05213;ko05223;ko05010;ko04930	MAPK signaling pathway;MAPK signaling pathway - fly;ErbB signaling pathway;TGF-beta signaling pathway;VEGF signaling pathway;mTOR signaling pathway;Regulation of actin cytoskeleton;Focal adhesion;Adherens junction;Gap junction;Vascular smooth muscle contraction;Insulin signaling pathway;GnRH signaling pathway;Progesterone-mediated oocyte maturation;Melanogenesis;Toll-like receptor signaling pathw…	K04371	1	95.9662	1	126.099	9.28946e-16	55.28	126.1	1	115.698	1.23526e-13	46.45	115.7	1	95.9662
131	709	709		5582;7163	6127;7911	28251	65738	o101004_RD463HCLSb_i39	2236	28243	65725	o100702_RD463HSLCi_39	4356	IPI00003921;IPI00553103;IPI00218697;IPI00218700;IPI00739613;IPI00791144;IPI00218698;IPI00218699;IPI00218701;IPI00877070	IPI00003921	IPI00003921	Protein 4.1;Band 4.1;P4.1;EPB4.1;4.1R;Protein 4.1;Band 4.1;P4.1;EPB4.1;4.1R;Protein 4.1;Band 4.1;P4.1;EPB4.1;4.1R;Protein 4.1;Band 4.1;P4.1;EPB4.1;4.1R;EPB41 protein;EPB41 protein;Protein 4.1;Band 4.1;P4.1;EPB4.1;4.1R;Protein 4.1;Band 4.1;P4.1;EPB4.1;4.1R;Protein 4.1;Band 4.1;P4.1;EPB4.1;4.1R;Putative uncharacterized protein EPB41	EPB41;E41P;EPB41;E41P;EPB41;E41P;EPB41;E41P;EPB41;EPB41;EPB41;E41P;EPB41;E41P;EPB41;E41P;EPB41	Isoform 1 of Protein 4.1;Isoform 7 of Protein 4.1;Isoform 2 of Protein 4.1;Isoform 5 of Protein 4.1;EPB41 protein;EPB41 protein;Isoform 3 of Protein 4.1;Isoform 4 of Protein 4.1;Isoform 6 of Protein 4.1;Putative uncharacterized protein EPB41 (Fragment)	P11171-1;P11171;P11171-7;P11171-2;Q1WWM3;Q59F12;P11171-5;B1ALH8;Q29RX4;Q4VB87;P11171-3;Q4VB86;P11171-4;B1ALH9;P11171-6;A8MU61	ENST00000343067;ENST00000347529;ENST00000349460;ENST00000356093;ENST00000358989;ENST00000373798;ENST00000398865;ENST00000343067;ENST00000347529;ENST00000349460;ENST00000356093;ENST00000358989;ENST00000373798;ENST00000398865;ENST00000343067;ENST00000347529;ENST00000349460;ENST00000356093;ENST00000358989;ENST00000373798;ENST00000398865;ENST00000343067;ENST00000347529;ENST00000349460;ENST00000356093…	PF05902;PF08736;PF09380;PF00373;PF09379;PF04382;PF05902;PF08736;PF09380;PF00373;PF09379;PF04382;PF05902;PF08736;PF09380;PF00373;PF09379;PF04382;PF05902;PF08736;PF09380;PF00373;PF09379;PF04382;PF05902;PF08736;PF09380;PF00373;PF09379;PF04382;PF05902;PF08736;PF09380;PF00373;PF09379;PF04382;PF05902;PF08736;PF09380;PF00373;PF09379;PF04382;PF05902;PF08736;PF09380;PF00373;PF09379;PF04382;PF05902;PF08736…	4_1_CTD;FA;FERM_C;FERM_M;FERM_N;SAB;4_1_CTD;FA;FERM_C;FERM_M;FERM_N;SAB;4_1_CTD;FA;FERM_C;FERM_M;FERM_N;SAB;4_1_CTD;FA;FERM_C;FERM_M;FERM_N;SAB;4_1_CTD;FA;FERM_C;FERM_M;FERM_N;SAB;4_1_CTD;FA;FERM_C;FERM_M;FERM_N;SAB;4_1_CTD;FA;FERM_C;FERM_M;FERM_N;SAB;4_1_CTD;FA;FERM_C;FERM_M;FERM_N;SAB;4_1_CTD;FA;FERM_C;FERM_M;FERM_N;SAB;4_1_CTD;FA;FERM_C;FERM_M;FERM_N;SAB	4.1 protein C-terminal domain (CTD);FERM adjacent (FA);FERM C-terminal PH-like domain;FERM central domain;FERM N-terminal domain;SAB domain;4.1 protein C-terminal domain (CTD);FERM adjacent (FA);FERM C-terminal PH-like domain;FERM central domain;FERM N-terminal domain;SAB domain;4.1 protein C-terminal domain (CTD);FERM adjacent (FA);FERM C-terminal PH-like domain;FERM central domain;FERM N-termin…	1GG3;2RQ1;1GG3;2RQ1;1GG3;2RQ1;1GG3;2RQ1;1GG3;2RQ1;1GG3;2RQ1;1GG3;2RQ1	GO:0005634;GO:0005856;GO:0005886;GO:0008091;GO:0014731;GO:0016020;GO:0019898;GO:0032991;GO:0043226;GO:0043227;GO:0043228;GO:0043229;GO:0043231;GO:0043232;GO:0043234;GO:0044422;GO:0044424;GO:0044425;GO:0044430;GO:0044444;GO:0044446;GO:0044448;GO:0044464;GO:0005634;GO:0005856;GO:0005886;GO:0008091;GO:0014731;GO:0016020;GO:0019898;GO:0032991;GO:0043226;GO:0043227;GO:0043228;GO:0043229;GO:0043231;GO:…	nucleus;cytoskeleton;plasma membrane;spectrin;spectrin-associated cytoskeleton;membrane;extrinsic to membrane;macromolecular complex;organelle;membrane-bounded organelle;non-membrane-bounded organelle;intracellular organelle	GO:0003779;GO:0005198;GO:0005200;GO:0005488;GO:0005515;GO:0005543;GO:0005545;GO:0008092;GO:0008289;GO:0030507;GO:0035091;GO:0003779;GO:0005198;GO:0005200;GO:0005488;GO:0005515;GO:0005543;GO:0005545;GO:0008092;GO:0008289;GO:0030507;GO:0035091;GO:0003779;GO:0005198;GO:0005200;GO:0005488;GO:0005515;GO:0005543;GO:0005545;GO:0008092;GO:0008289;GO:0030507;GO:0035091;GO:0003779;GO:0005198;GO:0005200;GO:…	actin binding;structural molecule activity;structural constituent of cytoskeleton;binding;protein binding;phospholipid binding;phosphatidylinositol binding;cytoskeletal protein binding;lipid binding;spectrin binding;phosphoinositide binding;actin binding	GO:0003008;GO:0003013;GO:0006996;GO:0007010;GO:0008015;GO:0009987;GO:0016043;GO:0030029;GO:0030036;GO:0030865;GO:0030866;GO:0032092;GO:0032501;GO:0043393;GO:0044093;GO:0051098;GO:0051099;GO:0065007;GO:0065009;GO:0003008;GO:0003013;GO:0006996;GO:0007010;GO:0008015;GO:0009987;GO:0016043;GO:0030029;GO:0030036;GO:0030865;GO:0030866;GO:0032092;GO:0032501;GO:0043393;GO:0044093;GO:0051098;GO:0051099;GO:…	system process;circulatory system process;organelle organization;cytoskeleton organization;blood circulation;cellular process;cellular component organization;actin filament-based process;actin cytoskeleton organization;cortical cytoskeleton organization	hsa:2035;hsa:2035;hsa:2035;hsa:2035;hsa:2035;hsa:2035;hsa:2035	ko04530	Tight junction	K06107	0.986046	18.5156	0.488281	0	0.244523	24.49	44.874	0.886242	8.93947	0.247191	23.21	54.274	0.986046	18.5156
144	182	182	Phosphoserine	778	844	3064	7183	o100802_RD463HCLSa_55i	5658	3064	7183	o100802_RD463HCLSa_55i	5658	IPI00004407	IPI00004407	IPI00004407	Signaling threshold-regulating transmembrane adapter 1;Suppression-inducing transmembrane adapter 1;SHP2-interacting transmembrane adapter protein;gp30/40	SIT1;SIT	Signaling threshold-regulating transmembrane adapter 1	Q9Y3P8;B2RBP9	ENST00000259608					GO:0005887;GO:0016021;GO:0031224;GO:0031226;GO:0044425;GO:0044459;GO:0044464	integral to plasma membrane;integral to membrane;intrinsic to membrane;intrinsic to plasma membrane;membrane part;plasma membrane part;cell part	GO:0005488;GO:0005515;GO:0019899;GO:0019900;GO:0019904;GO:0042169	binding;protein binding;enzyme binding;kinase binding;protein domain specific binding;SH2 domain binding	GO:0002376;GO:0002682;GO:0002694;GO:0006955;GO:0007154;GO:0007165;GO:0009987;GO:0050789;GO:0050794;GO:0050863;GO:0050865;GO:0050896;GO:0051249;GO:0065007	immune system process;regulation of immune system process;regulation of leukocyte activation;immune response;cell communication;signal transduction;cellular process;regulation of biological process;regulation of cellular process	hsa:27240				1	121.473	1	121.473	7.8969e-44	41.91	187	1	81.13	4.30543e-29	31.63	163.43	1	109.523
246	18	18	Phosphoserine	631;632	686;687	2496	5828	o101004_RD463HCLSb_i33	4917	2499	5834	o100702_RD463HSLCi_45	7945	IPI00006932;IPI00893315;IPI00893087	IPI00006932	IPI00006932	Putative RNA-binding protein Luc7-like 2;Putative uncharacterized protein CGI-59	LUC7L2;CGI-59;CGI-74;CGI-59	Isoform 1 of Putative RNA-binding protein Luc7-like 2;9 kDa protein;Putative uncharacterized protein CGI-59	Q9Y383-1;Q9Y383;B3KSL5;Q75M91	ENST00000263545;ENST00000354926	PF03194;PF03194	LUC7;LUC7	LUC7 N_terminus;LUC7 N_terminus				GO:0005488;GO:0005515;GO:0008270;GO:0043167;GO:0043169;GO:0046872;GO:0046914	binding;protein binding;zinc ion binding;ion binding;cation binding;metal ion binding;transition metal ion binding			hsa:51631				0.99682	24.962	0.877471	8.55029	0.00327722	17	77.709						0.99682	24.962
445	348	348	Phosphothreonine	5216;5217	5722;5723	21057	49676	o100702_RD463HSLCi_31	5482	21059	49684	o101004_RD463HCLSb_i31	2946	IPI00011689	IPI00011689	IPI00011689	Elongation factor 2 kinase;eEF-2 kinase;Calcium/calmodulin-dependent eukaryotic elongation factor 2 kinase	EEF2K	Elongation factor 2 kinase	O00418;Q8N588	ENST00000263026	PF02816;PF08238	Alpha_kinase;Sel1	Alpha-kinase family;Sel1 repeat		GO:0005829;GO:0044424;GO:0044444;GO:0044464	cytosol;intracellular part;cytoplasmic part;cell part	GO:0000166;GO:0001882;GO:0001883;GO:0003676;GO:0003824;GO:0004672;GO:0004674;GO:0004683;GO:0004686;GO:0005488;GO:0005509;GO:0005515;GO:0005516;GO:0005524;GO:0008135;GO:0016301;GO:0016740;GO:0016772;GO:0016773;GO:0017076;GO:0030554;GO:0032553;GO:0032555;GO:0032559;GO:0043167;GO:0043169;GO:0045182;GO:0046872	nucleotide binding;nucleoside binding;purine nucleoside binding;nucleic acid binding;catalytic activity;protein kinase activity;protein serine/threonine kinase activity;calmodulin-dependent protein kinase activity;elongation factor-2 kinase activity	GO:0006414;GO:0006464;GO:0006468;GO:0006793;GO:0006796;GO:0008152;GO:0009058;GO:0009059;GO:0009987;GO:0016310;GO:0019538;GO:0034645;GO:0034960;GO:0034961;GO:0043170;GO:0043283;GO:0043284;GO:0043412;GO:0043687;GO:0044237;GO:0044238;GO:0044249;GO:0044260;GO:0044267	translational elongation;protein modification process;protein amino acid phosphorylation;phosphorus metabolic process;phosphate metabolic process;metabolic process;biosynthetic process;macromolecule biosynthetic process;cellular process;phosphorylation	hsa:29904			K08292	1	73.4595	0.999996	54.8836	1.06923e-20	58.2	151.49						1	65.6283
488	473	473	Phosphoserine	7212	7968	28449	66198	o100806_RD463HCLSa_43i	8401	28448	66196	o100702_RD463HSLCi_43	7771	IPI00012866	IPI00012866	IPI00012866	RAC-alpha serine/threonine-protein kinase;RAC-PK-alpha;Protein kinase B;C-AKT	AKT1;PKB;RAC	RAC-alpha serine/threonine-protein kinase	P31749;B0LPE5;B2RAM5;B3KVH4;B3KXD7;Q9BV07	ENST00000349310;ENST00000402615;ENST00000407796	PF00169;PF00069;PF00433	PH;Pkinase;Pkinase_C	PH domain;Protein kinase domain;Protein kinase C terminal domain	1H10;1UNP;1UNQ;1UNR;2UVM;2UZR;2UZS;3CQU;3CQW	GO:0005654;GO:0005829;GO:0005886;GO:0016020;GO:0044422;GO:0044424;GO:0044428;GO:0044444;GO:0044446;GO:0044464	nucleoplasm;cytosol;plasma membrane;membrane;organelle part;intracellular part;nuclear part;cytoplasmic part;intracellular organelle part;cell part	GO:0000166;GO:0001882;GO:0001883;GO:0003824;GO:0004672;GO:0004674;GO:0005215;GO:0005351;GO:0005402;GO:0005488;GO:0005515;GO:0005524;GO:0005543;GO:0005547;GO:0008289;GO:0008324;GO:0015075;GO:0015144;GO:0015291;GO:0015293;GO:0015294;GO:0015295;GO:0016301;GO:0016740;GO:0016772;GO:0016773;GO:0017076;GO:0019899;GO:0022804;GO:0022857;GO:0022891;GO:0022892;GO:0030234;GO:0030235;GO:0030554;GO:0032553;GO:…	nucleotide binding;nucleoside binding;purine nucleoside binding;catalytic activity;protein kinase activity;protein serine/threonine kinase activity;transporter activity;sugar:hydrogen symporter activity;cation:sugar symporter activity;binding	GO:0000060;GO:0000079;GO:0000271;GO:0001558;GO:0005975;GO:0005976;GO:0005977;GO:0005978;GO:0005979;GO:0005996;GO:0006006;GO:0006066;GO:0006073;GO:0006091;GO:0006109;GO:0006112;GO:0006417;GO:0006464;GO:0006468;GO:0006469;GO:0006793;GO:0006796;GO:0006807;GO:0006809;GO:0006810;GO:0006886;GO:0006915;GO:0006924;GO:0006950;GO:0007154;GO:0007165;GO:0007166;GO:0007167;GO:0007169;GO:0007186;GO:0008152;GO:…	protein import into nucleus, translocation;regulation of cyclin-dependent protein kinase activity;polysaccharide biosynthetic process;regulation of cell growth;carbohydrate metabolic process;polysaccharide metabolic process;glycogen metabolic process	hsa:207	ko04010;ko04012;ko04370;ko04630;ko04150;ko04210;ko04510;ko04530;ko04910;ko04920;ko04914;ko04620;ko04660;ko04662;ko04664;ko04062;ko05200;ko05210;ko05212;ko05214;ko05221;ko05220;ko05218;ko05211;ko05215;ko05213;ko05222;ko05223	MAPK signaling pathway;ErbB signaling pathway;VEGF signaling pathway;Jak-STAT signaling pathway;mTOR signaling pathway;Apoptosis;Focal adhesion;Tight junction;Insulin signaling pathway;Adipocytokine signaling pathway;Progesterone-mediated oocyte maturation;Toll-like receptor signaling pathway;T cell receptor signaling pathway;B cell receptor signaling pathway;Fc epsilon RI signaling pathway;Chemo…	K04456	0.999768	36.5866						0.999768	36.5866	0.000794951	23.68	96.604	0.217456	-2.03751
520	348	348		4301	4733	17403	41257	o100702_RD463HSLCi_45	7450	17403	41257	o100702_RD463HSLCi_45	7450	IPI00013455;IPI00027172;IPI00217113;IPI00747225;IPI00019642;IPI00872646;IPI00246616	IPI00013455	IPI00013455	CLIP1 protein;CAP-Gly domain-containing linker protein 1;Restin;Cytoplasmic linker protein 170 alpha-2;Reed-Sternberg intermediate filament-associated protein;Cytoplasmic linker protein 1;CAP-Gly domain-containing linker protein 1;Restin;Cytoplasmic linker protein 170 alpha-2;Reed-Sternberg intermediate filament-associated protein;Cytoplasmic linker protein 1;cDNA FLJ45045 fis, clone BRAWH3021580…	CLIP1;CLIP1;CYLN1;RSN;CLIP1;CYLN1;RSN;CLIP2;CYLN2;KIAA0291;WBSCR4;WSCR4;CLIP2;CYLN2;KIAA0291;WBSCR4;WSCR4	CLIP1 protein;Isoform Long of CAP-Gly domain-containing linker protein 1;Isoform Short of CAP-Gly domain-containing linker protein 1;cDNA FLJ45045 fis, clone BRAWH3021580, highly similar to Restin;Isoform 1 of CAP-Gly domain-containing linker protein 2;116	A0AVD3;O43667;Q17RS4;P30622-1;P30622;Q29RG0;Q6P5Z9;P30622-2;B3KXA5;Q59GJ4;Q9UDT6-1;Q9UDT6;Q9UDT6-2;A7E2F7;Q7Z5B7	ENST00000302528;ENST00000302528;ENST00000358808;ENST00000361654;ENST00000302528;ENST00000358808;ENST00000361654;ENST00000302528;ENST00000392458;ENST00000223398;ENST00000361545;ENST00000395058;ENST00000395060;ENST00000223398;ENST00000361545;ENST00000395058;ENST00000395060	PF01302;PF01302;PF01302;PF01302;PF01302;PF01302	CAP_GLY;CAP_GLY;CAP_GLY;CAP_GLY;CAP_GLY;CAP_GLY	CAP-Gly domain;CAP-Gly domain;CAP-Gly domain;CAP-Gly domain;CAP-Gly domain;CAP-Gly domain	2CP5;2CP6;2E3H;2E3I;2E4H;2HQH;2QK0;3E2U;2CP5;2CP6;2E3H;2E3I;2E4H;2HQH;2QK0;3E2U;2CP2;2CP3;2CP2;2CP3	GO:0000776;GO:0005768;GO:0005874;GO:0005882;GO:0032991;GO:0043226;GO:0043227;GO:0043228;GO:0043229;GO:0043231;GO:0043232;GO:0043234;GO:0044422;GO:0044424;GO:0044427;GO:0044430;GO:0044444;GO:0044446;GO:0044464;GO:0000776;GO:0005768;GO:0005874;GO:0005882;GO:0032991;GO:0043226;GO:0043227;GO:0043228;GO:0043229;GO:0043231;GO:0043232;GO:0043234;GO:0044422;GO:0044424;GO:0044427;GO:0044430;GO:0044444;GO:…	kinetochore;endosome;microtubule;intermediate filament;macromolecular complex;organelle;membrane-bounded organelle;non-membrane-bounded organelle;intracellular organelle;intracellular membrane-bounded organelle;intracellular non-membrane-bounded organelle	GO:0003676;GO:0005488;GO:0008270;GO:0043167;GO:0043169;GO:0046872;GO:0046914;GO:0003676;GO:0005488;GO:0005515;GO:0008017;GO:0008092;GO:0008270;GO:0015631;GO:0042802;GO:0042803;GO:0043167;GO:0043169;GO:0046872;GO:0046914;GO:0046983;GO:0003676;GO:0005488;GO:0005515;GO:0008017;GO:0008092;GO:0008270;GO:0015631;GO:0042802;GO:0042803;GO:0043167;GO:0043169;GO:0046872;GO:0046914;GO:0046983;GO:0003676;GO:…	nucleic acid binding;binding;zinc ion binding;ion binding;cation binding;metal ion binding;transition metal ion binding;nucleic acid binding;binding;protein binding;microtubule binding;cytoskeletal protein binding;zinc ion binding;tubulin binding	GO:0000280;GO:0006996;GO:0007067;GO:0009987;GO:0016043;GO:0022402;GO:0022403;GO:0048285;GO:0000280;GO:0006996;GO:0007067;GO:0009987;GO:0016043;GO:0022402;GO:0022403;GO:0048285	nuclear division;organelle organization;mitosis;cellular process;cellular component organization;cell cycle process;cell cycle phase;organelle fission;nuclear division;organelle organization;mitosis;cellular process;cellular component organization	hsa:6249;hsa:6249;hsa:7461;hsa:7461			K10421;K10422	0.985816	18.9419						0.600388	2.69274	0.0148162	35.12	68.222	0.908292	12.9685
532	224	224	Phosphoserine	2910;2911;3864	3175;3176;3177;3178;3179;3180;4255	11292	26396	o101004_RD463HCLSb_i51	3134	11293	26397	o101004_RD463HCLSb_i51	3138	IPI00013830;IPI00910816	IPI00013830	IPI00013830	SNW domain-containing protein 1;Nuclear protein SkiP;Ski-interacting protein;Nuclear receptor coactivator NCoA-62;cDNA FLJ59238, highly similar to SNW domain-containing protein 1	SNW1;SKIIP;SKIP	SNW domain-containing protein 1;cDNA FLJ59238, highly similar to SNW domain-containing protein 1	Q13573;A8K8A9;B4DY36;Q0D2M5;Q6I9S2;Q6P151;Q9ULA6;B4DEG7	ENST00000261531	PF02731;PF02731	SKIP_SNW;SKIP_SNW	SKIP/SNW domain;SKIP/SNW domain		GO:0005681;GO:0030529;GO:0032991;GO:0044422;GO:0044424;GO:0044428;GO:0044446;GO:0044464;GO:0005681;GO:0030529;GO:0032991;GO:0044422;GO:0044424;GO:0044428;GO:0044446;GO:0044464	spliceosomal complex;ribonucleoprotein complex;macromolecular complex;organelle part;intracellular part;nuclear part;intracellular organelle part;cell part;spliceosomal complex;ribonucleoprotein complex;macromolecular complex;organelle part	GO:0003712;GO:0003713;GO:0005102;GO:0005112;GO:0005488;GO:0005515;GO:0008134;GO:0016563;GO:0030528;GO:0005488;GO:0005515	transcription cofactor activity;transcription coactivator activity;receptor binding;Notch binding;binding;protein binding;transcription factor binding;transcription activator activity;transcription regulator activity;binding;protein binding	GO:0000375;GO:0000377;GO:0000398;GO:0006139;GO:0006355;GO:0006357;GO:0006396;GO:0006397;GO:0006807;GO:0008152;GO:0008380;GO:0009889;GO:0009890;GO:0009892;GO:0009987;GO:0010468;GO:0010556;GO:0010558;GO:0010605;GO:0010629;GO:0016070;GO:0016071;GO:0016481;GO:0019219;GO:0019222;GO:0031323;GO:0031324;GO:0031326;GO:0031327;GO:0034960;GO:0043170;GO:0043283;GO:0044237;GO:0044238;GO:0044260;GO:0045449;GO:…	RNA splicing, via transesterification reactions;RNA splicing, via transesterification reactions with bulged adenosine as nucleophile;nuclear mRNA splicing, via spliceosome;nucleobase, nucleoside, nucleotide and nucleic acid metabolic process	hsa:22938	ko04330	Notch signaling pathway	K06063	1	107.21	1	97.3141	1.33722e-08	64.58	120.16	0.999857	41.4423	0.129563	19.54	50.855	1	107.21
546	181	181	Phosphoserine	1307	1431	5290	12448	o100702_RD463HSLCi_53	6546	5290	12448	o100702_RD463HSLCi_53	6546	IPI00014068	IPI00014068	IPI00014068	Serine/threonine-protein kinase PAK 4;p21-activated kinase 4	PAK4;KIAA1142	Isoform 1 of Serine/threonine-protein kinase PAK 4	O96013-1;O96013;A8K724;B4DE88	ENST00000321944;ENST00000358301;ENST00000360442	PF00786;PF00069	PBD;Pkinase	P21-Rho-binding domain;Protein kinase domain	2BVA;2CDZ;2J0I;2OV2;2Q0N	GO:0005794;GO:0043226;GO:0043227;GO:0043229;GO:0043231;GO:0044424;GO:0044444;GO:0044464	Golgi apparatus;organelle;membrane-bounded organelle;intracellular organelle;intracellular membrane-bounded organelle;intracellular part;cytoplasmic part;cell part	GO:0000166;GO:0001882;GO:0001883;GO:0003824;GO:0004672;GO:0004674;GO:0005488;GO:0005515;GO:0005524;GO:0016301;GO:0016740;GO:0016772;GO:0016773;GO:0017076;GO:0030554;GO:0032553;GO:0032555;GO:0032559	nucleotide binding;nucleoside binding;purine nucleoside binding;catalytic activity;protein kinase activity;protein serine/threonine kinase activity;binding;protein binding;ATP binding;kinase activity;transferase activity	GO:0006464;GO:0006468;GO:0006793;GO:0006796;GO:0006928;GO:0007154;GO:0007165;GO:0008152;GO:0009987;GO:0016310;GO:0019538;GO:0034960;GO:0043170;GO:0043283;GO:0043412;GO:0043687;GO:0044237;GO:0044238;GO:0044260;GO:0044267;GO:0050789;GO:0050794;GO:0065007	protein modification process;protein amino acid phosphorylation;phosphorus metabolic process;phosphate metabolic process;cell motion;cell communication;signal transduction;metabolic process;cellular process;phosphorylation;protein metabolic process	hsa:10298	ko04012;ko04810;ko04510;ko04660;ko04360;ko05211	ErbB signaling pathway;Regulation of actin cytoskeleton;Focal adhesion;T cell receptor signaling pathway;Axon guidance;Renal cell carcinoma	K05734	0.999991	50.5788	0.997952	26.8855	0.000917487	23.09	63.599						0.998811	29.2578
553	640	640	Phosphoserine	4518;4519	4961;4962	18162	42996	o101004_RD463HCLSb_i47	2310	18153	42983	o101004_RD463HCLSb_i43	3167	IPI00014256;IPI00843979;IPI00640748	IPI00014256	IPI00014256	Rho guanine nucleotide exchange factor 6;Rac/Cdc42 guanine nucleotide exchange factor 6;PAK-interacting exchange factor alpha;Alpha-Pix;COOL-2;Rho guanine nucleotide exchange factor 6;Rac/Cdc42 guanine nucleotide exchange factor 6;PAK-interacting exchange factor alpha;Alpha-Pix;COOL-2	ARHGEF6;COOL2;KIAA0006;PIXA;ARHGEF6;COOL2;KIAA0006;PIXA	Isoform 1 of Rho guanine nucleotide exchange factor 6;87 kDa protein;Isoform 2 of Rho guanine nucleotide exchange factor 6	Q15052-1;Q15052;Q15052-2;B1AL37;Q8N4Q3	ENST00000250617;ENST00000250617	PF00307;PF00169;PF00621;PF00018;PF00307;PF00169;PF00621;PF00018	CH;PH;RhoGEF;SH3_1;CH;PH;RhoGEF;SH3_1	Calponin homology (CH) domain;PH domain;RhoGEF domain;SH3 domain;Calponin homology (CH) domain;PH domain;RhoGEF domain;SH3 domain	1UJY;1WYR;1UJY;1WYR	GO:0005737;GO:0044424;GO:0044464;GO:0005737;GO:0044424;GO:0044464	cytoplasm;intracellular part;cell part;cytoplasm;intracellular part;cell part	GO:0005083;GO:0005085;GO:0005088;GO:0005089;GO:0005096;GO:0008047;GO:0030234;GO:0030695;GO:0060589;GO:0005083;GO:0005085;GO:0005088;GO:0005089;GO:0005096;GO:0008047;GO:0030234;GO:0030695;GO:0060589	small GTPase regulator activity;guanyl-nucleotide exchange factor activity;Ras guanyl-nucleotide exchange factor activity;Rho guanyl-nucleotide exchange factor activity;GTPase activator activity;enzyme activator activity;enzyme regulator activity	GO:0000165;GO:0006915;GO:0006950;GO:0007154;GO:0007165;GO:0007242;GO:0007243;GO:0007254;GO:0008219;GO:0009966;GO:0009987;GO:0010646;GO:0012501;GO:0016265;GO:0031098;GO:0033554;GO:0035023;GO:0046578;GO:0050789;GO:0050794;GO:0050896;GO:0051056;GO:0051716;GO:0065007;GO:0000165;GO:0006915;GO:0006950;GO:0007154;GO:0007165;GO:0007242;GO:0007243;GO:0007254;GO:0008219;GO:0009966;GO:0009987;GO:0010646;GO:…	MAPKKK cascade;apoptosis;response to stress;cell communication;signal transduction;intracellular signaling cascade;protein kinase cascade;JNK cascade;cell death;regulation of signal transduction;cellular process;regulation of cell communication	hsa:9459;hsa:9459	ko04810;ko05212	Regulation of actin cytoskeleton;Pancreatic cancer	K05729	1	111.073	1	60.6623	0.0699934	11.77	60.662	1	89.4745	0.000416136	25.43	89.474	1	111.073
577	228	228		1303;6418	1427;7103	5269	12402	o101004_RD463HCLSb_i53	3821	25781	60055	o101004_RD463HCLSb_i47	4390	IPI00015199	IPI00015199	IPI00015199	T-cell antigen CD7;GP40;T-cell leukemia antigen;TP41;Leu-9	CD7	T-cell antigen CD7	P09564;Q29VG2;Q29VG3;Q29VG4;Q29VG5;Q53F24	ENST00000312648	PF07686	V-set	Immunoglobulin V-set domain		GO:0000267;GO:0005624;GO:0005626;GO:0005886;GO:0016020;GO:0016021;GO:0031224;GO:0044425;GO:0044464	cell fraction;membrane fraction;insoluble fraction;plasma membrane;membrane;integral to membrane;intrinsic to membrane;membrane part;cell part	GO:0004871;GO:0004872;GO:0060089	signal transducer activity;receptor activity;molecular transducer activity	GO:0001775;GO:0002376;GO:0006955;GO:0007154;GO:0007165;GO:0007166;GO:0007167;GO:0007169;GO:0009987;GO:0042110;GO:0045321;GO:0046649;GO:0050789;GO:0050794;GO:0050896;GO:0065007	cell activation;immune system process;immune response;cell communication;signal transduction;cell surface receptor linked signal transduction;enzyme linked receptor protein signaling pathway;transmembrane receptor protein tyrosine kinase signaling pathway	hsa:924	ko04640	Hematopoietic cell lineage	K06457	0.985744	18.3975											0.985744	18.3975
648	165	165		4504	4943	18091	42822	o100702_RD463HSLCi_57	4024	18094	42827	o101004_RD463HCLSb_i57	2145	IPI00017596;IPI00910350	IPI00017596	IPI00017596	Microtubule-associated protein RP/EB family member 1;APC-binding protein EB1;End-binding protein 1;cDNA FLJ52068, highly similar to Microtubule-associated protein RP/EB family member 1	MAPRE1	Microtubule-associated protein RP/EB family member 1;cDNA FLJ52068, highly similar to Microtubule-associated protein RP/EB family member 1	Q15691;A2VCR0;B2R6I7;B4DM33	ENST00000375571;ENST00000375571	PF00307;PF03271;PF00307;PF03271	CH;EB1;CH;EB1	Calponin homology (CH) domain;EB1-like C-terminal motif;Calponin homology (CH) domain;EB1-like C-terminal motif	1PA7;1TXQ;1UEG;1VKA;1WU9;1YIB;1YIG;2HKQ;2HL3;2HL5;2QJZ;2R8U	GO:0005856;GO:0030863;GO:0030981;GO:0043226;GO:0043228;GO:0043229;GO:0043232;GO:0044422;GO:0044424;GO:0044430;GO:0044444;GO:0044446;GO:0044448;GO:0044464;GO:0005794;GO:0043226;GO:0043227;GO:0043229;GO:0043231;GO:0044424;GO:0044444;GO:0044464	cytoskeleton;cortical cytoskeleton;cortical microtubule cytoskeleton;organelle;non-membrane-bounded organelle;intracellular organelle;intracellular non-membrane-bounded organelle;organelle part;intracellular part;cytoskeletal part;cytoplasmic part	GO:0005488;GO:0005515;GO:0008017;GO:0008022;GO:0008092;GO:0015631;GO:0051010;GO:0005488;GO:0005515;GO:0008017;GO:0008092;GO:0015631	binding;protein binding;microtubule binding;protein C-terminus binding;cytoskeletal protein binding;tubulin binding;microtubule plus-end binding;binding;protein binding;microtubule binding;cytoskeletal protein binding;tubulin binding	GO:0000280;GO:0006996;GO:0007067;GO:0008283;GO:0009892;GO:0009987;GO:0010605;GO:0010639;GO:0016043;GO:0019222;GO:0022402;GO:0022403;GO:0031110;GO:0031111;GO:0031113;GO:0031115;GO:0031323;GO:0031324;GO:0031333;GO:0032268;GO:0032269;GO:0032271;GO:0032272;GO:0032886;GO:0033043;GO:0043254;GO:0044087;GO:0048285;GO:0048519;GO:0048523;GO:0050789;GO:0050794;GO:0051128;GO:0051129;GO:0051246;GO:0051248;GO:…	nuclear division;organelle organization;mitosis;cell proliferation;negative regulation of metabolic process;cellular process;negative regulation of macromolecule metabolic process;negative regulation of organelle organization	hsa:22919			K10436	0.812869	6.68168						0.00894541	-16.6935	0.471404	20.23	34.986	0.609927	4.96007
804	1706	1706	Phosphoserine	7343;7344;8563;8564;9059	8119;8120;9525;9526;10066	28971	67351	o100802_RD463HCLSa_45i	3780	28970	67339	o100702_RD463HSLCi_45	3900	IPI00022449;IPI00442455	IPI00022449	IPI00022449	Dedicator of cytokinesis protein 2;cDNA FLJ27234 fis, clone SYN07051	DOCK2;KIAA0209	Isoform 1 of Dedicator of cytokinesis protein 2;cDNA FLJ27234 fis, clone SYN07051	Q92608-1;Q92608;B3KXW9;B3KY14;Q5XG91;Q6ZNS5	ENST00000256935;ENST00000343291	PF07653	SH3_2	Variant SH3 domain		GO:0005829;GO:0005856;GO:0012505;GO:0016020;GO:0043226;GO:0043228;GO:0043229;GO:0043232;GO:0044424;GO:0044444;GO:0044464	cytosol;cytoskeleton;endomembrane system;membrane;organelle;non-membrane-bounded organelle;intracellular organelle;intracellular non-membrane-bounded organelle;intracellular part;cytoplasmic part;cell part	GO:0005083;GO:0005085;GO:0005088;GO:0005089;GO:0005102;GO:0005488;GO:0005506;GO:0005515;GO:0009055;GO:0020037;GO:0030234;GO:0030676;GO:0030695;GO:0032403;GO:0042608;GO:0043167;GO:0043169;GO:0046872;GO:0046906;GO:0046914;GO:0060589	small GTPase regulator activity;guanyl-nucleotide exchange factor activity;Ras guanyl-nucleotide exchange factor activity;Rho guanyl-nucleotide exchange factor activity;receptor binding;binding;iron ion binding;protein binding;electron carrier activity	GO:0002376;GO:0006928;GO:0006935;GO:0006996;GO:0007010;GO:0007610;GO:0007626;GO:0009605;GO:0009987;GO:0016043;GO:0016477;GO:0030029;GO:0030036;GO:0030595;GO:0040011;GO:0042221;GO:0042330;GO:0048247;GO:0048870;GO:0050896;GO:0050900;GO:0051716;GO:0060326	immune system process;cell motion;chemotaxis;organelle organization;cytoskeleton organization;behavior;locomotory behavior;response to external stimulus;cellular process;cellular component organization;cell migration;actin filament-based process	hsa:1794	ko04062	Chemokine signaling pathway	K12367	0.999968	44.913	0.999968	44.913	2.9219e-46	53.31	192.41	0.991027	20.4317	5.69597e-26	51.37	158.5	0.99843	28.0341
889	100	100	Phosphoserine	2701	2940	10411	24245	o101004_RD463HCLSb_i37	5230	10411	24245	o101004_RD463HCLSb_i37	5230	IPI00024658;IPI00647752	IPI00024658	IPI00024658	OTU domain-containing protein 7B;Zinc finger protein Cezanne;Zinc finger A20 domain-containing protein 1;Cellular zinc finger anti-NF-kappa-B protein;OTU domain containing 7B	OTUD7B;ZA20D1;OTUD7B;RP11-212K13.2-003	OTU domain-containing protein 7B;OTU domain containing 7B	Q6GQQ9;Q5SZ60;Q5SZ59	ENST00000369135;ENST00000369135	PF02338;PF02338	OTU;OTU	OTU-like cysteine protease;OTU-like cysteine protease		GO:0005634;GO:0005737;GO:0043226;GO:0043227;GO:0043229;GO:0043231;GO:0044424;GO:0044464;GO:0005737;GO:0044424;GO:0044464	nucleus;cytoplasm;organelle;membrane-bounded organelle;intracellular organelle;intracellular membrane-bounded organelle;intracellular part;cell part;cytoplasm;intracellular part;cell part	GO:0003676;GO:0003677;GO:0003824;GO:0005488;GO:0005515;GO:0008233;GO:0008234;GO:0008270;GO:0016787;GO:0043167;GO:0043169;GO:0046872;GO:0046914;GO:0070011;GO:0003824;GO:0004221;GO:0016787;GO:0016788;GO:0016790	nucleic acid binding;DNA binding;catalytic activity;binding;protein binding;peptidase activity;cysteine-type peptidase activity;zinc ion binding;hydrolase activity;ion binding;cation binding;metal ion binding;transition metal ion binding	GO:0006508;GO:0008152;GO:0009056;GO:0009057;GO:0009966;GO:0009968;GO:0009987;GO:0010627;GO:0010646;GO:0010648;GO:0010741;GO:0019538;GO:0019941;GO:0030163;GO:0034960;GO:0034962;GO:0043122;GO:0043124;GO:0043170;GO:0043283;GO:0043285;GO:0043632;GO:0044237;GO:0044238;GO:0044248;GO:0044257;GO:0044260;GO:0044265;GO:0044267;GO:0048519;GO:0048523;GO:0050789;GO:0050794;GO:0051603;GO:0065007;GO:0006464;GO:…	proteolysis;metabolic process;catabolic process;macromolecule catabolic process;regulation of signal transduction;negative regulation of signal transduction;cellular process;regulation of protein kinase cascade;regulation of cell communication	hsa:56957			K11860	1	70.4492	0.999984	49.153	4.66174e-06	35.56	113.06	1	67.9446	7.89961e-25	61.96	160.03	1	70.4492
983	619	619		1882	2061	7511	17680	o101004_RD463HCLSb_i45	6170	7511	17680	o101004_RD463HCLSb_i45	6170	IPI00027269;IPI00884054	IPI00027269	IPI00027269	E3 ubiquitin-protein ligase CBL;Signal transduction protein CBL;Proto-oncogene c-CBL;Casitas B-lineage lymphoma proto-oncogene;RING finger protein 55;E3 ubiquitin-protein ligase CBL;Signal transduction protein CBL;Proto-oncogene c-CBL;Casitas B-lineage lymphoma proto-oncogene;RING finger protein 55	CBL;CBL2;RNF55;CBL;CBL2;RNF55	E3 ubiquitin-protein ligase CBL;Cas-Br-M (murine) ecotropic retroviral transforming sequence	P22681;A3KMP8	ENST00000264033;ENST00000264033	PF02262;PF02761;PF02762;PF00627;PF00097;PF02262;PF02761;PF02762;PF00627;PF00097	Cbl_N;Cbl_N2;Cbl_N3;UBA;zf-C3HC4;Cbl_N;Cbl_N2;Cbl_N3;UBA;zf-C3HC4	CBL proto-oncogene N-terminal domain 1;CBL proto-oncogene N-terminus, EF hand-like domain;CBL proto-oncogene N-terminus, SH2-like domain;UBA/TS-N domain;Zinc finger, C3HC4 type (RING finger);CBL proto-oncogene N-terminal domain 1;CBL proto-oncogene N-terminus, EF hand-like domain;CBL proto-oncogene N-terminus, SH2-like domain;UBA/TS-N domain;Zinc finger, C3HC4 type (RING finger)	1B47;1FBV;1YVH;2CBL;2JUJ;2K4D;2OO9;3BUM;3BUN;3BUO;3BUW;3BUX;1B47;1FBV;1YVH;2CBL;2JUJ;2K4D;2OO9;3BUM;3BUN;3BUO;3BUW;3BUX	GO:0005634;GO:0005829;GO:0043226;GO:0043227;GO:0043229;GO:0043231;GO:0044424;GO:0044444;GO:0044464;GO:0005634;GO:0005829;GO:0043226;GO:0043227;GO:0043229;GO:0043231;GO:0044424;GO:0044444;GO:0044464	nucleus;cytosol;organelle;membrane-bounded organelle;intracellular organelle;intracellular membrane-bounded organelle;intracellular part;cytoplasmic part;cell part;nucleus;cytosol;organelle;membrane-bounded organelle;intracellular organelle	GO:0003676;GO:0003677;GO:0003700;GO:0003824;GO:0004842;GO:0004871;GO:0005488;GO:0005509;GO:0005515;GO:0008270;GO:0016874;GO:0016879;GO:0016881;GO:0017124;GO:0019787;GO:0019904;GO:0030528;GO:0043167;GO:0043169;GO:0046872;GO:0046914;GO:0060089;GO:0003676;GO:0003677;GO:0003700;GO:0003824;GO:0004842;GO:0004871;GO:0005488;GO:0005509;GO:0005515;GO:0008270;GO:0016874;GO:0016879;GO:0016881;GO:0017124;GO:…	nucleic acid binding;DNA binding;transcription factor activity;catalytic activity;ubiquitin-protein ligase activity;signal transducer activity;binding;calcium ion binding;protein binding;zinc ion binding;ligase activity	GO:0006464;GO:0006508;GO:0007154;GO:0007165;GO:0007166;GO:0007167;GO:0007169;GO:0007173;GO:0008152;GO:0009056;GO:0009057;GO:0009987;GO:0016567;GO:0019538;GO:0019941;GO:0030100;GO:0030163;GO:0032446;GO:0032879;GO:0034960;GO:0034962;GO:0043170;GO:0043283;GO:0043285;GO:0043412;GO:0043632;GO:0043687;GO:0044237;GO:0044238;GO:0044248;GO:0044257;GO:0044260;GO:0044265;GO:0044267;GO:0045807;GO:0048259;GO:…	protein modification process;proteolysis;cell communication;signal transduction;cell surface receptor linked signal transduction;enzyme linked receptor protein signaling pathway;transmembrane receptor protein tyrosine kinase signaling pathway	hsa:867;hsa:867	ko04120;ko04012;ko04630;ko04910;ko04660;ko05200;ko05220	Ubiquitin mediated proteolysis;ErbB signaling pathway;Jak-STAT signaling pathway;Insulin signaling pathway;T cell receptor signaling pathway;Pathways in cancer;Chronic myeloid leukemia	K04707	0.936182	12.0975											0.936182	12.0975
990	341	341	Phosphothreonine	7245	8011	28664	66749	o101004_RD463HCLSb_i33	4818	28652	66698	o100702_RD463HSLCi_31	7407	IPI00027430;IPI00853215	IPI00027430	IPI00027430	Leukosialin;Leukocyte sialoglycoprotein;Sialophorin;Galactoglycoprotein	SPN;CD43	Leukosialin;36 kDa protein	P16150;A8K9B1	ENST00000360121;ENST00000395389					GO:0005615;GO:0005887;GO:0016021;GO:0031224;GO:0031226;GO:0044421;GO:0044425;GO:0044459;GO:0044464	extracellular space;integral to plasma membrane;integral to membrane;intrinsic to membrane;intrinsic to plasma membrane;extracellular region part;membrane part;plasma membrane part;cell part	GO:0004871;GO:0004872;GO:0004888;GO:0005488;GO:0008367;GO:0060089	signal transducer activity;receptor activity;transmembrane receptor activity;binding;bacterial binding;molecular transducer activity	GO:0001817;GO:0002376;GO:0006935;GO:0006950;GO:0006952;GO:0006955;GO:0006968;GO:0007162;GO:0007163;GO:0007610;GO:0007626;GO:0009605;GO:0009607;GO:0009617;GO:0009889;GO:0009891;GO:0009893;GO:0009987;GO:0010556;GO:0010557;GO:0010604;GO:0019222;GO:0030155;GO:0031323;GO:0031325;GO:0031326;GO:0031328;GO:0032680;GO:0040011;GO:0042035;GO:0042108;GO:0042221;GO:0042330;GO:0042534;GO:0042535;GO:0042742;GO:…	regulation of cytokine production;immune system process;chemotaxis;response to stress;defense response;immune response;cellular defense response;negative regulation of cell adhesion;establishment or maintenance of cell polarity;behavior	hsa:6693	ko04514	Cell adhesion molecules (CAMs)	K06477	0.999871	41.9196	0.993372	22.1546	0.0181595	32.58	96.193	0.999353	32.3434	1.50077e-08	37.13	120.67	0.999871	41.9196
1017	295	295	Phosphoserine	6780	7491	26903	62552	o100702_RD463HSLCi_41	9239	26903	62552	o100702_RD463HSLCi_41	9239	IPI00028059;IPI00216241;IPI00180634;IPI00180920	IPI00028059	IPI00028059	Protein numb homolog;Protein S171;Protein numb homolog;Protein S171;Protein numb homolog;Protein S171;Protein numb homolog;Protein S171	NUMB;NUMB;NUMB;NUMB	Isoform 1 of Protein numb homolog;Isoform 3 of Protein numb homolog;Isoform 2 of Protein numb homolog;Isoform 4 of Protein numb homolog	P49757-1;P49757;B2RCI6;P49757-3;P49757-2;B4E2B1;P49757-4;B1P2N7;B1P2N8;B1P2N9;B4DUD7;Q5D0E5;Q86SW5	ENST00000355058;ENST00000356296;ENST00000359560;ENST00000355058;ENST00000356296;ENST00000359560;ENST00000355058;ENST00000356296;ENST00000359560;ENST00000355058;ENST00000356296;ENST00000359560	PF06311;PF00640;PF06311;PF00640;PF06311;PF00640;PF06311;PF00640	NumbF;PID;NumbF;PID;NumbF;PID;NumbF;PID	NUMB domain;Phosphotyrosine interaction domain (PTB/PID);NUMB domain;Phosphotyrosine interaction domain (PTB/PID);NUMB domain;Phosphotyrosine interaction domain (PTB/PID);NUMB domain;Phosphotyrosine interaction domain (PTB/PID)		GO:0005887;GO:0016021;GO:0031224;GO:0031226;GO:0044425;GO:0044459;GO:0044464;GO:0005887;GO:0016021;GO:0031224;GO:0031226;GO:0044425;GO:0044459;GO:0044464;GO:0005887;GO:0016021;GO:0031224;GO:0031226;GO:0044425;GO:0044459;GO:0044464;GO:0005887;GO:0016021;GO:0031224;GO:0031226;GO:0044425;GO:0044459;GO:0044464	integral to plasma membrane;integral to membrane;intrinsic to membrane;intrinsic to plasma membrane;membrane part;plasma membrane part;cell part;integral to plasma membrane;integral to membrane;intrinsic to membrane;intrinsic to plasma membrane	GO:0005488;GO:0005515;GO:0005488;GO:0005515;GO:0005488;GO:0005515;GO:0005488;GO:0005515	binding;protein binding;binding;protein binding;binding;protein binding;binding;protein binding	GO:0007275;GO:0032501;GO:0032502;GO:0007275;GO:0032501;GO:0032502;GO:0007275;GO:0032501;GO:0032502;GO:0007275;GO:0032501;GO:0032502	multicellular organismal development;multicellular organismal process;developmental process;multicellular organismal development;multicellular organismal process;developmental process;multicellular organismal development;multicellular organismal process	hsa:8650;hsa:8650;hsa:8650;hsa:8650	ko04330	Notch signaling pathway	K06057	0.999994	55.2687	0.999676	37.9013	0.0652894	10.91	50.855
1128	171	171		1451	1591	5967	14058	o100702_RD463HSLCi_51	6667	5977	14089	o101004_RD463HCLSb_i51	4083	IPI00032003;IPI00552214	IPI00032003	IPI00032003	Emerin;Emerin;Emerin (Emery-Dreifuss muscular dystrophy), isoform CRA_b	EMD;EDMD;STA;EMD;XX-FW88778H2.1-010;hCG_41343	Emerin;Emerin	P50402;Q6FI02;Q5HY57	ENST00000369842;ENST00000369835;ENST00000369842	PF03020;PF03020	LEM;LEM	LEM domain;LEM domain	1JEI;2ODC;2ODG	GO:0005637;GO:0005783;GO:0016020;GO:0016021;GO:0019866;GO:0031090;GO:0031224;GO:0031965;GO:0043226;GO:0043227;GO:0043229;GO:0043231;GO:0044422;GO:0044424;GO:0044425;GO:0044428;GO:0044444;GO:0044446;GO:0044464;GO:0005635;GO:0005783;GO:0016020;GO:0031090;GO:0031965;GO:0031967;GO:0031975;GO:0043226;GO:0043227;GO:0043229;GO:0043231;GO:0044422;GO:0044424;GO:0044428;GO:0044444;GO:0044446;GO:0044464	nuclear inner membrane;endoplasmic reticulum;membrane;integral to membrane;organelle inner membrane;organelle membrane;intrinsic to membrane;nuclear membrane;organelle;membrane-bounded organelle;intracellular organelle	GO:0005488;GO:0005515	binding;protein binding	GO:0003008;GO:0003012;GO:0006936;GO:0007517;GO:0032501;GO:0032502;GO:0048513;GO:0048856	system process;muscle system process;muscle contraction;muscle organ development;multicellular organismal process;developmental process;organ development;anatomical structure development	hsa:2010				0.998395	27.9426	0.98237	17.4898	1.40458e-05	28.53	86.649	0.991507	24.0916	0.00269072	22.96	68.515	0.987575	19.0032
1156	328	328		5250;5251	5759;5760	21208	50010	o101004_RD463HCLSb_i37	2365	21200	49992	o100702_RD463HSLCi_37	4435	IPI00032902	IPI00032902	IPI00032902	Sphingomyelin phosphodiesterase 3;Neutral sphingomyelinase II;Neutral sphingomyelinase 2	SMPD3	Sphingomyelin phosphodiesterase 3	Q9NY59;A8K0T6;Q1ZYL9	ENST00000219334	PF03372	Exo_endo_phos	Endonuclease/Exonuclease/phosphatase family		GO:0000139;GO:0005886;GO:0016020;GO:0016021;GO:0031090;GO:0031224;GO:0044422;GO:0044424;GO:0044425;GO:0044431;GO:0044444;GO:0044446;GO:0044464	Golgi membrane;plasma membrane;membrane;integral to membrane;organelle membrane;intrinsic to membrane;organelle part;intracellular part;membrane part;Golgi apparatus part;cytoplasmic part;intracellular organelle part;cell part	GO:0000287;GO:0003824;GO:0004620;GO:0004767;GO:0005488;GO:0008081;GO:0016298;GO:0016787;GO:0016788;GO:0042578;GO:0043167;GO:0043169;GO:0046872	magnesium ion binding;catalytic activity;phospholipase activity;sphingomyelin phosphodiesterase activity;binding;phosphoric diester hydrolase activity;lipase activity;hydrolase activity;hydrolase activity, acting on ester bonds	GO:0006629;GO:0006643;GO:0006644;GO:0006665;GO:0006684;GO:0006685;GO:0007049;GO:0007275;GO:0008152;GO:0009056;GO:0009395;GO:0009987;GO:0016042;GO:0019637;GO:0030149;GO:0032501;GO:0032502;GO:0044237;GO:0044238;GO:0044242;GO:0044248;GO:0044255;GO:0046466	lipid metabolic process;membrane lipid metabolic process;phospholipid metabolic process;sphingolipid metabolic process;sphingomyelin metabolic process;sphingomyelin catabolic process;cell cycle;multicellular organismal development;metabolic process	hsa:55512	ko00600	Sphingolipid metabolism	K12352	1	48.7012	1	120.673	0.000940459	37.99	120.67	1	33.0407	0.000272542	17.06	97.956	1	48.7012
1157	327	327	Phosphoserine	10501	11666	41761	97280	o100802_RD463HCLSa_45i	6427	41761	97280	o100802_RD463HCLSa_45i	6427	IPI00032936	IPI00032936	IPI00032936	ETS domain-containing transcription factor ERF;Ets2 repressor factor;PE-2	ERF	ETS domain-containing transcription factor ERF	P50548	ENST00000222329	PF00178	Ets	Ets-domain		GO:0005634;GO:0043226;GO:0043227;GO:0043229;GO:0043231;GO:0044424;GO:0044464	nucleus;organelle;membrane-bounded organelle;intracellular organelle;intracellular membrane-bounded organelle;intracellular part;cell part	GO:0003676;GO:0003677;GO:0003700;GO:0003702;GO:0003704;GO:0003706;GO:0003712;GO:0003714;GO:0005488;GO:0005515;GO:0008134;GO:0016564;GO:0030528;GO:0043565	nucleic acid binding;DNA binding;transcription factor activity;RNA polymerase II transcription factor activity;specific RNA polymerase II transcription factor activity;ligand-regulated transcription factor activity;transcription cofactor activity	GO:0006139;GO:0006350;GO:0006355;GO:0006357;GO:0006807;GO:0008152;GO:0008283;GO:0009058;GO:0009059;GO:0009889;GO:0009987;GO:0010468;GO:0010556;GO:0019219;GO:0019222;GO:0031323;GO:0031326;GO:0034645;GO:0034960;GO:0034961;GO:0043170;GO:0043283;GO:0043284;GO:0044237;GO:0044238;GO:0044249;GO:0044260;GO:0045449;GO:0050789;GO:0050794;GO:0051171;GO:0051252;GO:0060255;GO:0065007;GO:0080090	nucleobase, nucleoside, nucleotide and nucleic acid metabolic process;transcription;regulation of transcription, DNA-dependent;regulation of transcription from RNA polymerase II promoter;nitrogen compound metabolic process;metabolic process	hsa:2077			K09434	1	101.269	1	101.269	3.35025e-19	30.38	145.69						1	98.0672
1160	189	189	Phosphoserine	7239	8005	28640	66675	o101004_RD463HCLSb_i47	5145	28634	66653	o100702_RD463HSLCi_47	7674	IPI00032970;IPI00789006	IPI00032970	IPI00032970	Oxysterol-binding protein-related protein 11;Putative uncharacterized protein OSBPL11	OSBPL11;ORP11;OSBP12;OSBPL11	Oxysterol-binding protein-related protein 11;Oxysterol-binding protein	Q9BXB4;A8K9I7;A8MZ15;Q9GZM0	ENST00000296220;ENST00000296220;ENST00000393455	PF01237;PF00169;PF01237	Oxysterol_BP;PH;Oxysterol_BP	Oxysterol-binding protein;PH domain;Oxysterol-binding protein	2D9X					GO:0006629;GO:0006810;GO:0006869;GO:0008152;GO:0008202;GO:0009058;GO:0009987;GO:0044237;GO:0044238;GO:0044249;GO:0044255;GO:0051234;GO:0006629;GO:0008152;GO:0008202;GO:0009058;GO:0009987;GO:0044237;GO:0044238;GO:0044249;GO:0044255	lipid metabolic process;transport;lipid transport;metabolic process;steroid metabolic process;biosynthetic process;cellular process;cellular metabolic process;primary metabolic process;cellular biosynthetic process;cellular lipid metabolic process	hsa:114885				1	81.2291	1	74.1327	5.11423e-35	58.5	176.49	1	65.7054	1.74481e-25	45.99	160.03	1	81.2291
1189	173	173	Phosphoserine	7368;9291	8148;10320	36742	85959	o100702_RD463HSLCi_41	5640	29050	67517	o100802_RD463HCLSa_45i	4481	IPI00045360	IPI00045360	IPI00045360	Protein capicua homolog	CIC;KIAA0306	Protein capicua homolog	Q96RK0	ENST00000160740	PF00505	HMG_box	HMG (high mobility group) box		GO:0005634;GO:0043226;GO:0043227;GO:0043229;GO:0043231;GO:0044424;GO:0044464	nucleus;organelle;membrane-bounded organelle;intracellular organelle;intracellular membrane-bounded organelle;intracellular part;cell part	GO:0003676;GO:0003677;GO:0005488;GO:0005515	nucleic acid binding;DNA binding;binding;protein binding	GO:0006139;GO:0006350;GO:0006355;GO:0006807;GO:0008152;GO:0009058;GO:0009059;GO:0009889;GO:0009987;GO:0010468;GO:0010556;GO:0019219;GO:0019222;GO:0031323;GO:0031326;GO:0034645;GO:0034960;GO:0034961;GO:0043170;GO:0043283;GO:0043284;GO:0044237;GO:0044238;GO:0044249;GO:0044260;GO:0045449;GO:0050789;GO:0050794;GO:0051171;GO:0051252;GO:0060255;GO:0065007;GO:0080090	nucleobase, nucleoside, nucleotide and nucleic acid metabolic process;transcription;regulation of transcription, DNA-dependent;nitrogen compound metabolic process;metabolic process;biosynthetic process;macromolecule biosynthetic process	hsa:23152				0.996232	24.6806	0.988236	19.765	0.0165485	14.55	74.039	0.978138	17.2095	0.359149	16.52	54.274	0.144787	-7.55644
1194	784	784		7242	8008	28643	66678	o100702_RD463HSLCi_37	5643	28643	66678	o100702_RD463HSLCi_37	5643	IPI00054042;IPI00217449;IPI00217450;IPI00293242	IPI00054042	IPI00054042	General transcription factor II-I;Bruton tyrosine kinase-associated protein 135;SRF-Phox1-interacting protein;Williams-Beuren syndrome chromosomal region 6 protein;General transcription factor II-I;Bruton tyrosine kinase-associated protein 135;SRF-Phox1-interacting protein;Williams-Beuren syndrome chromosomal region 6 protein;General transcription factor II-I;Bruton tyrosine kinase-associated pro…	GTF2I;BAP135;WBSCR6;GTF2I;BAP135;WBSCR6;GTF2I;BAP135;WBSCR6;GTF2I;BAP135;WBSCR6	Isoform 1 of General transcription factor II-I;Isoform 3 of General transcription factor II-I;Isoform 4 of General transcription factor II-I;Isoform 2 of General transcription factor II-I	P78347-1;P78347;B4DH52;Q75M88;P78347-3;A8K9W7;Q75M86;P78347-4;Q499G6;Q75M87;P78347-2;B4DM07;B4DRA9;Q75M85;Q86U51	ENST00000324896;ENST00000346152;ENST00000353920;ENST00000324896;ENST00000346152;ENST00000353920;ENST00000324896;ENST00000346152;ENST00000353920;ENST00000324896;ENST00000346152;ENST00000353920	PF02946;PF02946;PF02946;PF02946	GTF2I;GTF2I;GTF2I;GTF2I	GTF2I-like repeat;GTF2I-like repeat;GTF2I-like repeat;GTF2I-like repeat	2D9B;2DN4;2ED2;2EJE;2D9B;2DN4;2ED2;2EJE;2D9B;2DN4;2ED2;2EJE;2D9B;2DN4;2ED2;2EJE	GO:0005634;GO:0005737;GO:0043226;GO:0043227;GO:0043229;GO:0043231;GO:0044424;GO:0044464;GO:0005634;GO:0005737;GO:0043226;GO:0043227;GO:0043229;GO:0043231;GO:0044424;GO:0044464;GO:0005634;GO:0005737;GO:0043226;GO:0043227;GO:0043229;GO:0043231;GO:0044424;GO:0044464;GO:0005634;GO:0005737;GO:0043226;GO:0043227;GO:0043229;GO:0043231;GO:0044424;GO:0044464	nucleus;cytoplasm;organelle;membrane-bounded organelle;intracellular organelle;intracellular membrane-bounded organelle;intracellular part;cell part;nucleus;cytoplasm;organelle;membrane-bounded organelle;intracellular organelle	GO:0003676;GO:0003677;GO:0003700;GO:0003702;GO:0005488;GO:0005515;GO:0016251;GO:0030528;GO:0003676;GO:0003677;GO:0003700;GO:0003702;GO:0005488;GO:0005515;GO:0016251;GO:0030528;GO:0003676;GO:0003677;GO:0003700;GO:0003702;GO:0005488;GO:0005515;GO:0016251;GO:0030528;GO:0003676;GO:0003677;GO:0003700;GO:0003702;GO:0005488;GO:0005515;GO:0016251;GO:0030528	nucleic acid binding;DNA binding;transcription factor activity;RNA polymerase II transcription factor activity;binding;protein binding;general RNA polymerase II transcription factor activity;transcription regulator activity;nucleic acid binding	GO:0006352;GO:0006355;GO:0006367;GO:0007154;GO:0007165;GO:0009889;GO:0009987;GO:0010468;GO:0010556;GO:0010926;GO:0016043;GO:0019219;GO:0019222;GO:0022607;GO:0031323;GO:0031326;GO:0034621;GO:0034622;GO:0043933;GO:0045449;GO:0050789;GO:0050794;GO:0051171;GO:0051252;GO:0060255;GO:0065003;GO:0065004;GO:0065007;GO:0080090;GO:0006352;GO:0006355;GO:0006367;GO:0007154;GO:0007165;GO:0009889;GO:0009987;GO:…	transcription initiation;regulation of transcription, DNA-dependent;transcription initiation from RNA polymerase II promoter;cell communication;signal transduction;regulation of biosynthetic process;cellular process;regulation of gene expression	hsa:2969;hsa:2969;hsa:2969;hsa:2969	ko03022	Basal transcription factors	K03121	0.994545	22.6086	0.902111	9.64528	0.0757907	10.54	59.232						0.992647	21.3032
1410	1302	1302		755;6928	821;7653	27411	63742	o100806_RD463HCLSa_47i	6918	2971	6898	o101004_RD463HCLSb_i45	4752	IPI00166528;IPI00455500;IPI00868848;IPI00913921	IPI00166528	IPI00166528	Rapamycin-insensitive companion of mTOR;mAVO3;Rapamycin-insensitive companion of mTOR;mAVO3;Rapamycin-insensitive companion of mTOR;mAVO3;Putative uncharacterized protein ENSP00000296782	RICTOR;KIAA1999;RICTOR;KIAA1999;RICTOR;KIAA1999	Isoform 3 of Rapamycin-insensitive companion of mTOR;Isoform 1 of Rapamycin-insensitive companion of mTOR;Isoform 2 of Rapamycin-insensitive companion of mTOR;Putative uncharacterized protein ENSP00000296782	Q6R327-3;Q6R327;Q6R327-1;B2RNX0;Q6R327-2;Q8N6M7;B5MDM6	ENST00000357387;ENST00000357387;ENST00000357387;ENST00000296782;ENST00000357387	PF00618;PF00618;PF00618;PF00618	RasGEF_N;RasGEF_N;RasGEF_N;RasGEF_N	Guanine nucleotide exchange factor for Ras-like GTPases; N-terminal motif;Guanine nucleotide exchange factor for Ras-like GTPases; N-terminal motif;Guanine nucleotide exchange factor for Ras-like GTPases; N-terminal motif;Guanine nucleotide exchange factor for Ras-like GTPases; N-terminal motif		GO:0031932;GO:0032991;GO:0043234;GO:0044424;GO:0044464;GO:0031932;GO:0032991;GO:0043234;GO:0044424;GO:0044464;GO:0031932;GO:0032991;GO:0043234;GO:0044424;GO:0044464;GO:0005622;GO:0044464	TORC2 complex;macromolecular complex;protein complex;intracellular part;cell part;TORC2 complex;macromolecular complex;protein complex;intracellular part;cell part;TORC2 complex;macromolecular complex;protein complex;intracellular part;cell part	GO:0005085;GO:0005488;GO:0005515;GO:0030234;GO:0030695;GO:0060589;GO:0005085;GO:0005488;GO:0005515;GO:0030234;GO:0030695;GO:0060589;GO:0005085;GO:0005488;GO:0005515;GO:0030234;GO:0030695;GO:0060589;GO:0005085;GO:0005488;GO:0030234;GO:0030695;GO:0060589	guanyl-nucleotide exchange factor activity;binding;protein binding;enzyme regulator activity;GTPase regulator activity;nucleoside-triphosphatase regulator activity;guanyl-nucleotide exchange factor activity;binding;protein binding	GO:0006996;GO:0007010;GO:0009790;GO:0009966;GO:0009987;GO:0010627;GO:0010646;GO:0016043;GO:0030029;GO:0030036;GO:0031532;GO:0032502;GO:0050789;GO:0050794;GO:0051896;GO:0065007;GO:0006996;GO:0007010;GO:0009790;GO:0009966;GO:0009987;GO:0010627;GO:0010646;GO:0016043;GO:0030029;GO:0030036;GO:0031532;GO:0032502;GO:0050789;GO:0050794;GO:0051896;GO:0065007;GO:0006996;GO:0007010;GO:0009790;GO:0009966;GO:…	organelle organization;cytoskeleton organization;embryonic development;regulation of signal transduction;cellular process;regulation of protein kinase cascade;regulation of cell communication;cellular component organization;actin filament-based process	hsa:253260;hsa:253260;hsa:253260	ko04150	mTOR signaling pathway	K08267	0.999997	56.3993	0.999957	46.1063	0.0724836	22.11	54.321	0.999997	56.3993	0.0259331	19.75	70.439	0.999962	46.6158
1410	1282	1282	Phosphoserine	8134	9044	32178	75129	o100702_RD463HSLCi_51	6874	32178	75129	o100702_RD463HSLCi_51	6874	IPI00166528;IPI00455500;IPI00868848;IPI00913921	IPI00166528	IPI00166528	Rapamycin-insensitive companion of mTOR;mAVO3;Rapamycin-insensitive companion of mTOR;mAVO3;Rapamycin-insensitive companion of mTOR;mAVO3;Putative uncharacterized protein ENSP00000296782	RICTOR;KIAA1999;RICTOR;KIAA1999;RICTOR;KIAA1999	Isoform 3 of Rapamycin-insensitive companion of mTOR;Isoform 1 of Rapamycin-insensitive companion of mTOR;Isoform 2 of Rapamycin-insensitive companion of mTOR;Putative uncharacterized protein ENSP00000296782	Q6R327-3;Q6R327;Q6R327-1;B2RNX0;Q6R327-2;Q8N6M7;B5MDM6	ENST00000357387;ENST00000357387;ENST00000357387;ENST00000296782;ENST00000357387	PF00618;PF00618;PF00618;PF00618	RasGEF_N;RasGEF_N;RasGEF_N;RasGEF_N	Guanine nucleotide exchange factor for Ras-like GTPases; N-terminal motif;Guanine nucleotide exchange factor for Ras-like GTPases; N-terminal motif;Guanine nucleotide exchange factor for Ras-like GTPases; N-terminal motif;Guanine nucleotide exchange factor for Ras-like GTPases; N-terminal motif		GO:0031932;GO:0032991;GO:0043234;GO:0044424;GO:0044464;GO:0031932;GO:0032991;GO:0043234;GO:0044424;GO:0044464;GO:0031932;GO:0032991;GO:0043234;GO:0044424;GO:0044464;GO:0005622;GO:0044464	TORC2 complex;macromolecular complex;protein complex;intracellular part;cell part;TORC2 complex;macromolecular complex;protein complex;intracellular part;cell part;TORC2 complex;macromolecular complex;protein complex;intracellular part;cell part	GO:0005085;GO:0005488;GO:0005515;GO:0030234;GO:0030695;GO:0060589;GO:0005085;GO:0005488;GO:0005515;GO:0030234;GO:0030695;GO:0060589;GO:0005085;GO:0005488;GO:0005515;GO:0030234;GO:0030695;GO:0060589;GO:0005085;GO:0005488;GO:0030234;GO:0030695;GO:0060589	guanyl-nucleotide exchange factor activity;binding;protein binding;enzyme regulator activity;GTPase regulator activity;nucleoside-triphosphatase regulator activity;guanyl-nucleotide exchange factor activity;binding;protein binding	GO:0006996;GO:0007010;GO:0009790;GO:0009966;GO:0009987;GO:0010627;GO:0010646;GO:0016043;GO:0030029;GO:0030036;GO:0031532;GO:0032502;GO:0050789;GO:0050794;GO:0051896;GO:0065007;GO:0006996;GO:0007010;GO:0009790;GO:0009966;GO:0009987;GO:0010627;GO:0010646;GO:0016043;GO:0030029;GO:0030036;GO:0031532;GO:0032502;GO:0050789;GO:0050794;GO:0051896;GO:0065007;GO:0006996;GO:0007010;GO:0009790;GO:0009966;GO:…	organelle organization;cytoskeleton organization;embryonic development;regulation of signal transduction;cellular process;regulation of protein kinase cascade;regulation of cell communication;cellular component organization;actin filament-based process	hsa:253260;hsa:253260;hsa:253260	ko04150	mTOR signaling pathway	K08267	0.954321	13.2057	0.873876	8.56344	0.0619371	18.53	56.495	0.939389	11.9101	1.88729e-05	25.96	84.15	0.947196	12.5589
1504	44	44	Phosphoserine	4551;6814	5000;5001;7528	18296	43329	o100806_RD463HCLSa_55i	6678	18303	43347	o101004_RD463HCLSb_i55	3610	IPI00179700;IPI00744851;IPI00746310	IPI00179700	IPI00179700	High mobility group protein HMG-I/HMG-Y;High mobility group AT-hook protein 1;cDNA FLJ54188, moderately similar to High mobility group protein HMG-I/HMG-Y;High mobility group protein HMG-I/HMG-Y;High mobility group AT-hook protein 1	HMGA1;HMGIY;HMGA1;HMGIY	Isoform HMG-I of High mobility group protein HMG-I/HMG-Y;cDNA FLJ54188, moderately similar to High mobility group protein HMG-I/HMG-Y;Isoform HMG-R of High mobility group protein HMG-I/HMG-Y	P17096-1;P17096;Q5T6U9;B4DWA0;P17096-3	ENST00000311487;ENST00000357318;ENST00000360434;ENST00000374116;ENST00000374117;ENST00000395004;ENST00000401473;ENST00000311487;ENST00000357318;ENST00000360434;ENST00000374116;ENST00000374117;ENST00000395004;ENST00000401473	PF02178;PF02178;PF02178	AT_hook;AT_hook;AT_hook	AT hook motif;AT hook motif;AT hook motif	2EZD;2EZE;2EZF;2EZG;2EZD;2EZE;2EZF;2EZG	GO:0000785;GO:0005667;GO:0005829;GO:0032991;GO:0043234;GO:0044422;GO:0044424;GO:0044427;GO:0044428;GO:0044444;GO:0044446;GO:0044451;GO:0044464;GO:0000785;GO:0005634;GO:0043226;GO:0043227;GO:0043229;GO:0043231;GO:0044422;GO:0044424;GO:0044427;GO:0044446;GO:0044464;GO:0000785;GO:0005667;GO:0005829;GO:0032991;GO:0043234;GO:0044422;GO:0044424;GO:0044427;GO:0044428;GO:0044444;GO:0044446;GO:0044451;GO:…	chromatin;transcription factor complex;cytosol;macromolecular complex;protein complex;organelle part;intracellular part;chromosomal part;nuclear part;cytoplasmic part;intracellular organelle part;nucleoplasm part;cell part;chromatin;nucleus;organelle	GO:0003676;GO:0003677;GO:0003680;GO:0003700;GO:0003712;GO:0003713;GO:0005102;GO:0005488;GO:0005515;GO:0008134;GO:0016563;GO:0019899;GO:0030374;GO:0030528;GO:0035257;GO:0042974;GO:0042975;GO:0043565;GO:0046965;GO:0051427;GO:0003676;GO:0003677;GO:0005488;GO:0003676;GO:0003677;GO:0003680;GO:0003700;GO:0003712;GO:0003713;GO:0005102;GO:0005488;GO:0005515;GO:0008134;GO:0016563;GO:0019899;GO:0030374;GO:…	nucleic acid binding;DNA binding;AT DNA binding;transcription factor activity;transcription cofactor activity;transcription coactivator activity;receptor binding;binding;protein binding;transcription factor binding;transcription activator activity	GO:0001672;GO:0006139;GO:0006259;GO:0006268;GO:0006310;GO:0006325;GO:0006337;GO:0006345;GO:0006350;GO:0006355;GO:0006461;GO:0006807;GO:0006996;GO:0007154;GO:0007165;GO:0007166;GO:0007167;GO:0007169;GO:0008152;GO:0009058;GO:0009059;GO:0009889;GO:0009891;GO:0009893;GO:0009987;GO:0010468;GO:0010556;GO:0010557;GO:0010604;GO:0010628;GO:0010639;GO:0010847;GO:0010926;GO:0015074;GO:0016043;GO:0019047;GO:…	regulation of chromatin assembly or disassembly;nucleobase, nucleoside, nucleotide and nucleic acid metabolic process;DNA metabolic process;DNA unwinding during replication;DNA recombination;chromatin organization;nucleosome disassembly					0.997368	26.3148	0.970643	19.2206	3.12221e-11	31.5	91.413	0.997368	26.3148	8.33438e-09	36.49	84.112	0.90495	12.6813
1521	43	43		5551;5552;8082;8083	6091;6092;8985;8986;8987;8988	31985	74663	o100702_RD463HSLCi_41	9357	31988	74673	o100806_RD463HCLSa_41i	10684	IPI00182116	IPI00182116	IPI00182116	Rho GTPase-activating protein 15;Rho-type GTPase-activating protein 15;ArhGAP15	ARHGAP15;BM-024;BM-030;BM-046	Rho GTPase-activating protein 15	Q53QZ3;B4E0R3	ENST00000295095	PF00169;PF00620	PH;RhoGAP	PH domain;RhoGAP domain	3BYI	GO:0005737;GO:0016020;GO:0044424;GO:0044464	cytoplasm;membrane;intracellular part;cell part	GO:0005096;GO:0008047;GO:0030234;GO:0030695;GO:0060589	GTPase activator activity;enzyme activator activity;enzyme regulator activity;GTPase regulator activity;nucleoside-triphosphatase regulator activity	GO:0007154;GO:0007165;GO:0009987;GO:0050789;GO:0050794;GO:0065007	cell communication;signal transduction;cellular process;regulation of biological process;regulation of cellular process;biological regulation	hsa:55843				1	80.9494	1	63.9168	4.69916e-52	49.63	199.63	0.99998	46.9914	8.20182e-53	78.76	202.39	1	64.7673
1531	492	492	Phosphoserine	2664	2898	10213	23758	o100702_RD463HSLCi_49	7194	10213	23758	o100702_RD463HSLCi_49	7194	IPI00183118;IPI00220510;IPI00220508;IPI00220505;IPI00220507;IPI00220506;IPI00220509;IPI00827718	IPI00183118	IPI00183118	MAP/microtubule affinity-regulating kinase 3;Cdc25C-associated protein kinase 1;C-TAK1;Serine/threonine-protein kinase p78;Ser/Thr protein kinase PAR-1;Protein kinase STK10;MAP/microtubule affinity-regulating kinase 3;Cdc25C-associated protein kinase 1;C-TAK1;Serine/threonine-protein kinase p78;Ser/Thr protein kinase PAR-1;Protein kinase STK10;MAP/microtubule affinity-regulating kinase 3;Cdc25C-a…	MARK3;CTAK1;MARK3;CTAK1;MARK3;CTAK1;MARK3;CTAK1;MARK3;CTAK1;MARK3;CTAK1;MARK3;CTAK1;MARK3	Isoform 1 of MAP/microtubule affinity-regulating kinase 3;Isoform 7 of MAP/microtubule affinity-regulating kinase 3;Isoform 5 of MAP/microtubule affinity-regulating kinase 3;Isoform 2 of MAP/microtubule affinity-regulating kinase 3;Isoform 4 of MAP/microtu	P27448-1;P27448;P27448-7;P27448-5;B4DKN1;Q86U11;P27448-2;P27448-4;P27448-3;P27448-6;A2SY06;Q59FB8;Q86TT8	ENST00000216288;ENST00000303622;ENST00000335102;ENST00000216288;ENST00000303622;ENST00000335102;ENST00000216288;ENST00000303622;ENST00000335102;ENST00000216288;ENST00000303622;ENST00000335102;ENST00000216288;ENST00000303622;ENST00000335102;ENST00000216288;ENST00000303622;ENST00000335102;ENST00000216288;ENST00000303622;ENST00000335102;ENST00000303622;ENST00000335102	PF02149;PF00069;PF00627;PF02149;PF00069;PF00627;PF02149;PF00069;PF00627;PF02149;PF00069;PF00627;PF02149;PF00069;PF00627;PF02149;PF00069;PF00627;PF02149;PF00069;PF00627;PF02149;PF00069;PF00627	KA1;Pkinase;UBA;KA1;Pkinase;UBA;KA1;Pkinase;UBA;KA1;Pkinase;UBA;KA1;Pkinase;UBA;KA1;Pkinase;UBA;KA1;Pkinase;UBA;KA1;Pkinase;UBA	Kinase associated domain 1;Protein kinase domain;UBA/TS-N domain;Kinase associated domain 1;Protein kinase domain;UBA/TS-N domain;Kinase associated domain 1;Protein kinase domain;UBA/TS-N domain;Kinase associated domain 1;Protein kinase domain;UBA/TS-N domain;Kinase associated domain 1;Protein kinase domain;UBA/TS-N domain;Kinase associated domain 1;Protein kinase domain;UBA/TS-N domain;Kinase as…	2QNJ;3FE3;2QNJ;3FE3;2QNJ;3FE3;2QNJ;3FE3;2QNJ;3FE3;2QNJ;3FE3;2QNJ;3FE3			GO:0000166;GO:0001882;GO:0001883;GO:0003824;GO:0004672;GO:0004674;GO:0005488;GO:0005515;GO:0005524;GO:0016301;GO:0016740;GO:0016772;GO:0016773;GO:0017076;GO:0030554;GO:0032553;GO:0032555;GO:0032559;GO:0000166;GO:0001882;GO:0001883;GO:0003824;GO:0004672;GO:0004674;GO:0005488;GO:0005515;GO:0005524;GO:0016301;GO:0016740;GO:0016772;GO:0016773;GO:0017076;GO:0030554;GO:0032553;GO:0032555;GO:0032559;GO:…	nucleotide binding;nucleoside binding;purine nucleoside binding;catalytic activity;protein kinase activity;protein serine/threonine kinase activity;binding;protein binding;ATP binding;kinase activity;transferase activity	GO:0006464;GO:0006468;GO:0006793;GO:0006796;GO:0008152;GO:0009987;GO:0016310;GO:0019538;GO:0034960;GO:0043170;GO:0043283;GO:0043412;GO:0043687;GO:0044237;GO:0044238;GO:0044260;GO:0044267;GO:0006464;GO:0006468;GO:0006793;GO:0006796;GO:0008152;GO:0009987;GO:0016310;GO:0019538;GO:0034960;GO:0043170;GO:0043283;GO:0043412;GO:0043687;GO:0044237;GO:0044238;GO:0044260;GO:0044267;GO:0006464;GO:0006468;GO:…	protein modification process;protein amino acid phosphorylation;phosphorus metabolic process;phosphate metabolic process;metabolic process;cellular process;phosphorylation;protein metabolic process;cellular biopolymer metabolic process	hsa:4140;hsa:4140;hsa:4140;hsa:4140;hsa:4140;hsa:4140;hsa:4140			K08798	1	64.8791	0.875524	8.47184	0.0799512	11.8	42.813	0.99995	42.9978	4.51726e-14	35.85	100.12	0.999999	59.302
1531	621	621	Phosphoserine	8368	9299	32901	76777	o100702_RD463HSLCi_47	4009	32906	76786	o100806_RD463HCLSa_47i	3943	IPI00183118;IPI00220510;IPI00220508;IPI00220505;IPI00220507;IPI00220506;IPI00220509;IPI00827718	IPI00183118	IPI00183118	MAP/microtubule affinity-regulating kinase 3;Cdc25C-associated protein kinase 1;C-TAK1;Serine/threonine-protein kinase p78;Ser/Thr protein kinase PAR-1;Protein kinase STK10;MAP/microtubule affinity-regulating kinase 3;Cdc25C-associated protein kinase 1;C-TAK1;Serine/threonine-protein kinase p78;Ser/Thr protein kinase PAR-1;Protein kinase STK10;MAP/microtubule affinity-regulating kinase 3;Cdc25C-a…	MARK3;CTAK1;MARK3;CTAK1;MARK3;CTAK1;MARK3;CTAK1;MARK3;CTAK1;MARK3;CTAK1;MARK3;CTAK1;MARK3	Isoform 1 of MAP/microtubule affinity-regulating kinase 3;Isoform 7 of MAP/microtubule affinity-regulating kinase 3;Isoform 5 of MAP/microtubule affinity-regulating kinase 3;Isoform 2 of MAP/microtubule affinity-regulating kinase 3;Isoform 4 of MAP/microtu	P27448-1;P27448;P27448-7;P27448-5;B4DKN1;Q86U11;P27448-2;P27448-4;P27448-3;P27448-6;A2SY06;Q59FB8;Q86TT8	ENST00000216288;ENST00000303622;ENST00000335102;ENST00000216288;ENST00000303622;ENST00000335102;ENST00000216288;ENST00000303622;ENST00000335102;ENST00000216288;ENST00000303622;ENST00000335102;ENST00000216288;ENST00000303622;ENST00000335102;ENST00000216288;ENST00000303622;ENST00000335102;ENST00000216288;ENST00000303622;ENST00000335102;ENST00000303622;ENST00000335102	PF02149;PF00069;PF00627;PF02149;PF00069;PF00627;PF02149;PF00069;PF00627;PF02149;PF00069;PF00627;PF02149;PF00069;PF00627;PF02149;PF00069;PF00627;PF02149;PF00069;PF00627;PF02149;PF00069;PF00627	KA1;Pkinase;UBA;KA1;Pkinase;UBA;KA1;Pkinase;UBA;KA1;Pkinase;UBA;KA1;Pkinase;UBA;KA1;Pkinase;UBA;KA1;Pkinase;UBA;KA1;Pkinase;UBA	Kinase associated domain 1;Protein kinase domain;UBA/TS-N domain;Kinase associated domain 1;Protein kinase domain;UBA/TS-N domain;Kinase associated domain 1;Protein kinase domain;UBA/TS-N domain;Kinase associated domain 1;Protein kinase domain;UBA/TS-N domain;Kinase associated domain 1;Protein kinase domain;UBA/TS-N domain;Kinase associated domain 1;Protein kinase domain;UBA/TS-N domain;Kinase as…	2QNJ;3FE3;2QNJ;3FE3;2QNJ;3FE3;2QNJ;3FE3;2QNJ;3FE3;2QNJ;3FE3;2QNJ;3FE3			GO:0000166;GO:0001882;GO:0001883;GO:0003824;GO:0004672;GO:0004674;GO:0005488;GO:0005515;GO:0005524;GO:0016301;GO:0016740;GO:0016772;GO:0016773;GO:0017076;GO:0030554;GO:0032553;GO:0032555;GO:0032559;GO:0000166;GO:0001882;GO:0001883;GO:0003824;GO:0004672;GO:0004674;GO:0005488;GO:0005515;GO:0005524;GO:0016301;GO:0016740;GO:0016772;GO:0016773;GO:0017076;GO:0030554;GO:0032553;GO:0032555;GO:0032559;GO:…	nucleotide binding;nucleoside binding;purine nucleoside binding;catalytic activity;protein kinase activity;protein serine/threonine kinase activity;binding;protein binding;ATP binding;kinase activity;transferase activity	GO:0006464;GO:0006468;GO:0006793;GO:0006796;GO:0008152;GO:0009987;GO:0016310;GO:0019538;GO:0034960;GO:0043170;GO:0043283;GO:0043412;GO:0043687;GO:0044237;GO:0044238;GO:0044260;GO:0044267;GO:0006464;GO:0006468;GO:0006793;GO:0006796;GO:0008152;GO:0009987;GO:0016310;GO:0019538;GO:0034960;GO:0043170;GO:0043283;GO:0043412;GO:0043687;GO:0044237;GO:0044238;GO:0044260;GO:0044267;GO:0006464;GO:0006468;GO:…	protein modification process;protein amino acid phosphorylation;phosphorus metabolic process;phosphate metabolic process;metabolic process;cellular process;phosphorylation;protein metabolic process;cellular biopolymer metabolic process	hsa:4140;hsa:4140;hsa:4140;hsa:4140;hsa:4140;hsa:4140;hsa:4140			K08798	0.992357	21.1603	0.269256	-4.03021	8.40983e-06	29.38	108.14	0.989096	19.6113	0.000940459	49.86	120.67	0.806535	9.21051
244	80	80	Phosphoserine	2681	2916	10265	23872	o100702_RD463HSLCi_43	7961	10265	23872	o100702_RD463HSLCi_43	7961	IPI00183642;IPI00006892	IPI00183642	IPI00183642	Zinc finger protein 280C;Suppressor of hairy wing homolog 3;Putative uncharacterized protein;Zinc finger protein 280C	ZNF280C;SUHW3;ZNF280C;RP3-438D16.3-002	Zinc finger protein 280C;Zinc finger protein 280C	Q8ND82;A8K2V8;Q9UJJ2	ENST00000370978;ENST00000066465;ENST00000370978					GO:0005634;GO:0043226;GO:0043227;GO:0043229;GO:0043231;GO:0044424;GO:0044464;GO:0005622;GO:0044464	nucleus;organelle;membrane-bounded organelle;intracellular organelle;intracellular membrane-bounded organelle;intracellular part;cell part;intracellular;cell part	GO:0003676;GO:0003677;GO:0005488;GO:0008270;GO:0043167;GO:0043169;GO:0046872;GO:0046914;GO:0005488;GO:0008270;GO:0043167;GO:0043169;GO:0046872;GO:0046914	nucleic acid binding;DNA binding;binding;zinc ion binding;ion binding;cation binding;metal ion binding;transition metal ion binding;binding;zinc ion binding;ion binding;cation binding;metal ion binding;transition metal ion binding	GO:0006139;GO:0006350;GO:0006355;GO:0006807;GO:0008152;GO:0009058;GO:0009059;GO:0009889;GO:0009987;GO:0010468;GO:0010556;GO:0019219;GO:0019222;GO:0031323;GO:0031326;GO:0034645;GO:0034960;GO:0034961;GO:0043170;GO:0043283;GO:0043284;GO:0044237;GO:0044238;GO:0044249;GO:0044260;GO:0045449;GO:0050789;GO:0050794;GO:0051171;GO:0051252;GO:0060255;GO:0065007;GO:0080090	nucleobase, nucleoside, nucleotide and nucleic acid metabolic process;transcription;regulation of transcription, DNA-dependent;nitrogen compound metabolic process;metabolic process;biosynthetic process;macromolecule biosynthetic process	hsa:55609				1	66.1981	0.999521	33.1934	0.00015758	26.91	94.321	0.99997	45.2764	0.000398294	33.92	85.495
1551	376	376		4203	4630	17039	40394	o101004_RD463HCLSb_i45	1924	17034	40382	o100702_RD463HSLCi_45	3807	IPI00185919;IPI00643027;IPI00411690	IPI00185919	IPI00185919	La-related protein 1;La ribonucleoprotein domain family member 1;La-related protein 1;La ribonucleoprotein domain family member 1;La-related protein 1;La ribonucleoprotein domain family member 1	LARP1;KIAA0731;LARP;LARP1;KIAA0731;LARP;LARP1;KIAA0731;LARP	Isoform 1 of La-related protein 1;Isoform 2 of La-related protein 1;Isoform 3 of La-related protein 1	Q6PKG0-1;Q6PKG0;Q6PKG0-2;Q6PKG0-3	ENST00000285894;ENST00000336314;ENST00000377643;ENST00000285894;ENST00000336314;ENST00000377643;ENST00000285894;ENST00000336314;ENST00000377643	PF05383;PF05383;PF05383	La;La;La	La domain;La domain;La domain				GO:0003676;GO:0003723;GO:0005488;GO:0005515;GO:0003676;GO:0003723;GO:0005488;GO:0005515;GO:0003676;GO:0003723;GO:0005488;GO:0005515	nucleic acid binding;RNA binding;binding;protein binding;nucleic acid binding;RNA binding;binding;protein binding;nucleic acid binding;RNA binding;binding;protein binding			hsa:23367;hsa:23367;hsa:23367				1	54.2738						1	40.0188	0.062181	14.24	63.904	1	54.2738
1034	9	9	Phosphoserine; by PKB/AKT1	9406	10442	37137	86875	o100802_RD463HCLSa_53i	6697	37136	86868	o100702_RD463HSLCi_53	7066	IPI00216190;IPI00028570	IPI00216190	IPI00216190	Glycogen synthase kinase-3 beta;Glycogen synthase kinase-3 beta	GSK3B;GSK3B	Isoform 2 of Glycogen synthase kinase-3 beta;Isoform 1 of Glycogen synthase kinase-3 beta	P49841-2;P49841;B5BUC0;P49841-1;Q6FI27	ENST00000264235;ENST00000316626;ENST00000264235;ENST00000316626	PF00069;PF00069	Pkinase;Pkinase	Protein kinase domain;Protein kinase domain	1GNG;1H8F;1I09;1J1B;1J1C;1O9U;1PYX;1Q3D;1Q3W;1Q41;1Q4L;1Q5K;1R0E;1UV5;2JDO;2JDR;2JLD;2O5K;2OW3;2UW9;3CQU;3CQW;3DU8;3E87;3E88;3E8D;3F7Z;3F88;1GNG;1H8F;1I09;1J1B;1J1C;1O9U;1PYX;1Q3D;1Q3W;1Q41;1Q4L;1Q5K;1R0E;1UV5;2JDO;2JDR;2JLD;2O5K;2OW3;2UW9;3CQU;3CQW;3DU8;3E87;3E88;3E8D;3F7Z;3F88	GO:0005634;GO:0005829;GO:0030877;GO:0032991;GO:0034747;GO:0043226;GO:0043227;GO:0043229;GO:0043231;GO:0043234;GO:0044424;GO:0044444;GO:0044464;GO:0005634;GO:0005829;GO:0030877;GO:0032991;GO:0034747;GO:0043226;GO:0043227;GO:0043229;GO:0043231;GO:0043234;GO:0044424;GO:0044444;GO:0044464	nucleus;cytosol;beta-catenin destruction complex;macromolecular complex;Axin-APC-beta-catenin-GSK3B complex;organelle;membrane-bounded organelle;intracellular organelle;intracellular membrane-bounded organelle;protein complex;intracellular part	GO:0000166;GO:0001882;GO:0001883;GO:0002039;GO:0003824;GO:0004672;GO:0004674;GO:0004696;GO:0005488;GO:0005515;GO:0005524;GO:0008013;GO:0008134;GO:0016301;GO:0016740;GO:0016772;GO:0016773;GO:0017076;GO:0019899;GO:0019900;GO:0019901;GO:0030554;GO:0032553;GO:0032555;GO:0032559;GO:0034236;GO:0050321;GO:0051018;GO:0051059;GO:0000166;GO:0001882;GO:0001883;GO:0002039;GO:0003824;GO:0004672;GO:0004674;GO:…	nucleotide binding;nucleoside binding;purine nucleoside binding;p53 binding;catalytic activity;protein kinase activity;protein serine/threonine kinase activity;glycogen synthase kinase 3 activity;binding;protein binding;ATP binding;beta-catenin binding	GO:0005975;GO:0005976;GO:0005977;GO:0006073;GO:0006091;GO:0006112;GO:0006464;GO:0006468;GO:0006793;GO:0006796;GO:0006950;GO:0006983;GO:0006984;GO:0007154;GO:0007165;GO:0007166;GO:0007242;GO:0008152;GO:0009607;GO:0009987;GO:0015980;GO:0016055;GO:0016310;GO:0018105;GO:0018193;GO:0018209;GO:0019538;GO:0031334;GO:0032386;GO:0032388;GO:0032879;GO:0032880;GO:0033157;GO:0033554;GO:0034960;GO:0034976;GO:…	carbohydrate metabolic process;polysaccharide metabolic process;glycogen metabolic process;cellular glucan metabolic process;generation of precursor metabolites and energy;energy reserve metabolic process;protein modification process	hsa:2932;hsa:2932	ko04012;ko04310;ko04340;ko04110;ko04510;ko04910;ko04916;ko04660;ko04662;ko04062;ko04360;ko04711;ko05200;ko05210;ko05217;ko05215;ko05213;ko05010	ErbB signaling pathway;Wnt signaling pathway;Hedgehog signaling pathway;Cell cycle;Focal adhesion;Insulin signaling pathway;Melanogenesis;T cell receptor signaling pathway;B cell receptor signaling pathway;Chemokine signaling pathway;Axon guidance;Circadian rhythm - fly;Pathways in cancer;Colorectal cancer;Basal cell carcinoma;Prostate cancer;Endometrial cancer;Alzheimer's disease	K03083	0.777364	7.74691	0.777364	7.74691	2.76284e-14	35.69	105.09	0.711975	6.49752	0.00081445	29.42	62.185	0.710025	5.69449
492	115	115		516	565	2116	4932	o100702_RD463HSLCi_41	8459	2116	4932	o100702_RD463HSLCi_41	8459	IPI00216199;IPI00012901	IPI00216199	IPI00216199	Trans-acting T-cell-specific transcription factor GATA-3;GATA-binding factor 3;Trans-acting T-cell-specific transcription factor GATA-3;GATA-binding factor 3	GATA3;GATA3	Isoform 2 of Trans-acting T-cell-specific transcription factor GATA-3;Isoform 1 of Trans-acting T-cell-specific transcription factor GATA-3	P23771-2;P23771;Q5VWG7;P23771-1;Q5VWG8	ENST00000346208;ENST00000379328;ENST00000346208;ENST00000379328	PF00320;PF00320	GATA;GATA	GATA zinc finger;GATA zinc finger		GO:0005634;GO:0043226;GO:0043227;GO:0043229;GO:0043231;GO:0044424;GO:0044464;GO:0005634;GO:0043226;GO:0043227;GO:0043229;GO:0043231;GO:0044424;GO:0044464	nucleus;organelle;membrane-bounded organelle;intracellular organelle;intracellular membrane-bounded organelle;intracellular part;cell part;nucleus;organelle;membrane-bounded organelle;intracellular organelle;intracellular membrane-bounded organelle	GO:0003676;GO:0003677;GO:0003700;GO:0005488;GO:0005515;GO:0008134;GO:0008270;GO:0030528;GO:0043167;GO:0043169;GO:0043565;GO:0046872;GO:0046914;GO:0003676;GO:0003677;GO:0003700;GO:0005488;GO:0005515;GO:0008134;GO:0008270;GO:0030528;GO:0043167;GO:0043169;GO:0043565;GO:0046872;GO:0046914	nucleic acid binding;DNA binding;transcription factor activity;binding;protein binding;transcription factor binding;zinc ion binding;transcription regulator activity;ion binding;cation binding;sequence-specific DNA binding;metal ion binding	GO:0003008;GO:0006139;GO:0006350;GO:0006351;GO:0006355;GO:0006366;GO:0006807;GO:0006950;GO:0006952;GO:0007600;GO:0007605;GO:0008152;GO:0009058;GO:0009059;GO:0009653;GO:0009719;GO:0009725;GO:0009889;GO:0009987;GO:0010033;GO:0010468;GO:0010556;GO:0016070;GO:0019219;GO:0019222;GO:0031323;GO:0031326;GO:0032501;GO:0032502;GO:0032774;GO:0034645;GO:0034960;GO:0034961;GO:0042221;GO:0043170;GO:0043283;GO:…	system process;nucleobase, nucleoside, nucleotide and nucleic acid metabolic process;transcription;transcription, DNA-dependent;regulation of transcription, DNA-dependent;transcription from RNA polymerase II promoter;nitrogen compound metabolic process	hsa:2625;hsa:2625			K09182	0.997443	25.9118											0.863626	8.01632
1626	36	36	Phosphoserine	834;4121	904;4540	16691	39465	o100806_RD463HCLSa_37i	7763	16701	39499	o101004_RD463HCLSb_i39	4021	IPI00217465	IPI00217465	IPI00217465	Histone H1.2;Histone H1d	HIST1H1C;H1F2	Histone H1.2	P16403;A8K4I2	ENST00000343677	PF00538	Linker_histone	linker histone H1 and H5 family		GO:0000786;GO:0005634;GO:0032991;GO:0032993;GO:0043226;GO:0043227;GO:0043229;GO:0043231;GO:0044422;GO:0044424;GO:0044427;GO:0044446;GO:0044464	nucleosome;nucleus;macromolecular complex;protein-DNA complex;organelle;membrane-bounded organelle;intracellular organelle;intracellular membrane-bounded organelle;organelle part;intracellular part;chromosomal part;intracellular organelle part;cell part	GO:0003676;GO:0003677;GO:0005488	nucleic acid binding;DNA binding;binding	GO:0006325;GO:0006334;GO:0006996;GO:0009987;GO:0010926;GO:0016043;GO:0022607;GO:0034621;GO:0034622;GO:0034728;GO:0043933;GO:0051276;GO:0065003;GO:0065004	chromatin organization;nucleosome assembly;organelle organization;cellular process;anatomical structure formation;cellular component organization;cellular component assembly;cellular macromolecular complex subunit organization	hsa:3006			K11275	1	88.343	1	78.7151	1.28364e-40	71.1	183.16	1	88.343	1.28364e-40	67.99	183.16	1	77.1051
1634	430	430		3291	3603	12735	29941	o101004_RD463HCLSb_i41	4749	12733	29936	o100806_RD463HCLSa_41i	8207	IPI00217616	IPI00217616	IPI00217616	Protein FAM126B	FAM126B	Protein FAM126B	Q8IXS8;B3KUG1;B3KW57	ENST00000286181	PF09790	Hyccin	Hyccin		GO:0005622;GO:0044464	intracellular;cell part					hsa:285172				1	104.516						1	180.608	6.72848e-38	64.71	180.61	1	104.516
19	2053	2053		7287;7683	8058;8525	30327	70631	o100702_RD463HSLCi_33	6218	30332	70638	o101004_RD463HCLSb_i33	3447	IPI00218624;IPI00218620;IPI00000192;IPI00401959;IPI00218622;IPI00878468;IPI00218619;IPI00401958;IPI00218618;IPI00402153;IPI00217930;IPI00748258;IPI00218617;IPI00218621	IPI00218624	IPI00218624	SON protein;SON3;Negative regulatory element-binding protein;DBP-5;Bax antagonist selected in saccharomyces 1;SON protein;SON3;Negative regulatory element-binding protein;DBP-5;Bax antagonist selected in saccharomyces 1;SON protein;SON3;Negative regulatory element-binding protein;DBP-5;Bax antagonist selected in saccharomyces 1;SON protein;SON3;Negative regulatory element-binding protein;DBP-5;Ba…	SON;C21orf50;DBP5;KIAA1019;NREBP;SON;C21orf50;DBP5;KIAA1019;NREBP;SON;C21orf50;DBP5;KIAA1019;NREBP;SON;C21orf50;DBP5;KIAA1019;NREBP;SON;C21orf50;DBP5;KIAA1019;NREBP;SON;C21orf50;DBP5;KIAA1019;NREBP;SON;C21orf50;DBP5;KIAA1019;NREBP;SON;C21orf50;DBP5;KIAA1019;NREBP;SON;C21orf50;DBP5;KIAA1019;NREBP;SON;C21orf50;DBP5;KIAA1019;NREBP	Isoform I of SON protein;Isoform D of SON protein;Isoform F of SON protein;SON DNA-binding protein isoform F;Isoform G of SON protein;260 kDa protein;Isoform C of SON protein;252 kDa protein;Isoform B of SON protein;SON DNA-binding protein isoform B;Isofor	P18583-9;P18583;P18583-5;P18583-1;P18583-7;P18583-4;P18583-3;P18583-10;P18583-2;P18583-8;A0JLP4;Q3SWV4;Q6PKE0;P18583-6	ENST00000290239;ENST00000300278;ENST00000321758;ENST00000356577;ENST00000381679;ENST00000381695;ENST00000290239;ENST00000300278;ENST00000321758;ENST00000356577;ENST00000381679;ENST00000381695;ENST00000290239;ENST00000300278;ENST00000321758;ENST00000356577;ENST00000381679;ENST00000381695;ENST00000290239;ENST00000300278;ENST00000321758;ENST00000356577;ENST00000381679;ENST00000381695;ENST00000290239…	PF00035;PF01585;PF00035;PF01585;PF00035;PF01585;PF00035;PF01585;PF00035;PF01585;PF00035;PF01585;PF00035;PF01585;PF00035;PF01585;PF00035;PF01585;PF00035;PF01585	dsrm;G-patch;dsrm;G-patch;dsrm;G-patch;dsrm;G-patch;dsrm;G-patch;dsrm;G-patch;dsrm;G-patch;dsrm;G-patch;dsrm;G-patch;dsrm;G-patch	Double-stranded RNA binding motif;G-patch domain;Double-stranded RNA binding motif;G-patch domain;Double-stranded RNA binding motif;G-patch domain;Double-stranded RNA binding motif;G-patch domain;Double-stranded RNA binding motif;G-patch domain;Double-stranded RNA binding motif;G-patch domain;Double-stranded RNA binding motif;G-patch domain;Double-stranded RNA binding motif;G-patch domain;Double-…		GO:0016604;GO:0016607;GO:0044422;GO:0044424;GO:0044428;GO:0044446;GO:0044451;GO:0044464;GO:0016604;GO:0016607;GO:0044422;GO:0044424;GO:0044428;GO:0044446;GO:0044451;GO:0044464;GO:0016604;GO:0016607;GO:0044422;GO:0044424;GO:0044428;GO:0044446;GO:0044451;GO:0044464;GO:0016604;GO:0016607;GO:0044422;GO:0044424;GO:0044428;GO:0044446;GO:0044451;GO:0044464;GO:0016604;GO:0016607;GO:0044422;GO:0044424;GO:…	nuclear body;nuclear speck;organelle part;intracellular part;nuclear part;intracellular organelle part;nucleoplasm part;cell part;nuclear body;nuclear speck;organelle part;intracellular part;nuclear part;intracellular organelle part;nucleoplasm part	GO:0003676;GO:0003677;GO:0003723;GO:0003725;GO:0005488;GO:0005515;GO:0003676;GO:0003677;GO:0003723;GO:0003725;GO:0005488;GO:0005515;GO:0003676;GO:0003677;GO:0003723;GO:0003725;GO:0005488;GO:0005515;GO:0003676;GO:0003677;GO:0003723;GO:0003725;GO:0005488;GO:0005515;GO:0003676;GO:0003677;GO:0003723;GO:0003725;GO:0005488;GO:0005515;GO:0003676;GO:0003677;GO:0003723;GO:0003725;GO:0005488;GO:0005515;GO:…	nucleic acid binding;DNA binding;RNA binding;double-stranded RNA binding;binding;protein binding;nucleic acid binding;DNA binding;RNA binding;double-stranded RNA binding;binding;protein binding;nucleic acid binding;DNA binding;RNA binding	GO:0006916;GO:0010941;GO:0042981;GO:0043066;GO:0043067;GO:0043069;GO:0048519;GO:0048523;GO:0050789;GO:0050793;GO:0050794;GO:0051093;GO:0060548;GO:0065007;GO:0006916;GO:0010941;GO:0042981;GO:0043066;GO:0043067;GO:0043069;GO:0048519;GO:0048523;GO:0050789;GO:0050793;GO:0050794;GO:0051093;GO:0060548;GO:0065007;GO:0006916;GO:0010941;GO:0042981;GO:0043066;GO:0043067;GO:0043069;GO:0048519;GO:0048523;GO:…	anti-apoptosis;regulation of cell death;regulation of apoptosis;negative regulation of apoptosis;regulation of programmed cell death;negative regulation of programmed cell death;negative regulation of biological process	hsa:6651;hsa:6651;hsa:6651;hsa:6651;hsa:6651;hsa:6651;hsa:6651;hsa:6651;hsa:6651;hsa:6651				0.999908	40.3835	0.999811	37.2555	0.0928407	28.39	65.094	0.924272	10.8971	0.490919	18.48	38.735	0.99957	33.6625
1789	2947	2947		699	758	2767	6440	o101004_RD463HCLSb_i49	1840	2767	6440	o101004_RD463HCLSb_i49	1840	IPI00289776;IPI00607852;IPI00383833;IPI00019896	IPI00289776	IPI00289776	Probable E3 ubiquitin-protein ligase MYCBP2;Myc-binding protein 2;Protein associated with Myc;Pam/highwire/rpm-1 protein;Probable E3 ubiquitin-protein ligase MYCBP2;Myc-binding protein 2;Protein associated with Myc;Pam/highwire/rpm-1 protein;Putative uncharacterized protein DKFZp586G0322;cDNA FLJ10106 fis, clone HEMBA1002569, highly similar to Homo sapiens protein associated with Myc mRNA	MYCBP2;KIAA0916;PAM;MYCBP2;KIAA0916;PAM;DKFZp586G0322	MYC binding protein 2;Isoform 2 of Probable E3 ubiquitin-protein ligase MYCBP2;Putative uncharacterized protein DKFZp586G0322 (Fragment);cDNA FLJ10106 fis, clone HEMBA1002569, highly similar to Homo sapiens protein associated with Myc mRNA (Fragment)	O75592-1;O75592;O75592-2;Q9UG08;Q9NWD4	ENST00000357337;ENST00000407578;ENST00000357337;ENST00000407578;ENST00000360084;ENST00000407578	PF08005;PF00415;PF08005;PF00415	PHR;RCC1;PHR;RCC1	PHR domain;Regulator of chromosome condensation (RCC1);PHR domain;Regulator of chromosome condensation (RCC1)		GO:0000151;GO:0000152;GO:0005680;GO:0032991;GO:0043234;GO:0044422;GO:0044424;GO:0044428;GO:0044446;GO:0044464;GO:0000151;GO:0000152;GO:0005680;GO:0032991;GO:0043234;GO:0044422;GO:0044424;GO:0044428;GO:0044446;GO:0044464	ubiquitin ligase complex;nuclear ubiquitin ligase complex;anaphase-promoting complex;macromolecular complex;protein complex;organelle part;intracellular part;nuclear part;intracellular organelle part;cell part;ubiquitin ligase complex	GO:0003824;GO:0005488;GO:0008270;GO:0016874;GO:0043167;GO:0043169;GO:0046872;GO:0046914;GO:0003824;GO:0005488;GO:0008270;GO:0016874;GO:0043167;GO:0043169;GO:0046872;GO:0046914	catalytic activity;binding;zinc ion binding;ligase activity;ion binding;cation binding;metal ion binding;transition metal ion binding;catalytic activity;binding;zinc ion binding;ligase activity;ion binding;cation binding;metal ion binding	GO:0006139;GO:0006350;GO:0006355;GO:0006508;GO:0006807;GO:0007088;GO:0007346;GO:0008152;GO:0009056;GO:0009057;GO:0009058;GO:0009059;GO:0009889;GO:0009987;GO:0010468;GO:0010556;GO:0010564;GO:0019219;GO:0019222;GO:0019538;GO:0019941;GO:0030071;GO:0030163;GO:0031323;GO:0031326;GO:0033043;GO:0034645;GO:0034960;GO:0034961;GO:0034962;GO:0043170;GO:0043283;GO:0043284;GO:0043285;GO:0043632;GO:0044237;GO:…	nucleobase, nucleoside, nucleotide and nucleic acid metabolic process;transcription;regulation of transcription, DNA-dependent;proteolysis;nitrogen compound metabolic process;regulation of mitosis;regulation of mitotic cell cycle;metabolic process	hsa:23077;hsa:23077			K10693	1	213.688						1	54.3214	0.0724836	25.91	54.321	1	213.688
1789	3441	3441		8740	9723	34475	80559	o101004_RD463HCLSb_i43	5285	34472	80546	o100702_RD463HSLCi_43	7755	IPI00289776;IPI00607852	IPI00289776	IPI00289776	Probable E3 ubiquitin-protein ligase MYCBP2;Myc-binding protein 2;Protein associated with Myc;Pam/highwire/rpm-1 protein;Probable E3 ubiquitin-protein ligase MYCBP2;Myc-binding protein 2;Protein associated with Myc;Pam/highwire/rpm-1 protein	MYCBP2;KIAA0916;PAM;MYCBP2;KIAA0916;PAM	MYC binding protein 2;Isoform 2 of Probable E3 ubiquitin-protein ligase MYCBP2	O75592-1;O75592;O75592-2	ENST00000357337;ENST00000407578;ENST00000357337;ENST00000407578	PF08005;PF00415;PF08005;PF00415	PHR;RCC1;PHR;RCC1	PHR domain;Regulator of chromosome condensation (RCC1);PHR domain;Regulator of chromosome condensation (RCC1)		GO:0000151;GO:0000152;GO:0005680;GO:0032991;GO:0043234;GO:0044422;GO:0044424;GO:0044428;GO:0044446;GO:0044464;GO:0000151;GO:0000152;GO:0005680;GO:0032991;GO:0043234;GO:0044422;GO:0044424;GO:0044428;GO:0044446;GO:0044464	ubiquitin ligase complex;nuclear ubiquitin ligase complex;anaphase-promoting complex;macromolecular complex;protein complex;organelle part;intracellular part;nuclear part;intracellular organelle part;cell part;ubiquitin ligase complex	GO:0003824;GO:0005488;GO:0008270;GO:0016874;GO:0043167;GO:0043169;GO:0046872;GO:0046914;GO:0003824;GO:0005488;GO:0008270;GO:0016874;GO:0043167;GO:0043169;GO:0046872;GO:0046914	catalytic activity;binding;zinc ion binding;ligase activity;ion binding;cation binding;metal ion binding;transition metal ion binding;catalytic activity;binding;zinc ion binding;ligase activity;ion binding;cation binding;metal ion binding	GO:0006139;GO:0006350;GO:0006355;GO:0006508;GO:0006807;GO:0007088;GO:0007346;GO:0008152;GO:0009056;GO:0009057;GO:0009058;GO:0009059;GO:0009889;GO:0009987;GO:0010468;GO:0010556;GO:0010564;GO:0019219;GO:0019222;GO:0019538;GO:0019941;GO:0030071;GO:0030163;GO:0031323;GO:0031326;GO:0033043;GO:0034645;GO:0034960;GO:0034961;GO:0034962;GO:0043170;GO:0043283;GO:0043284;GO:0043285;GO:0043632;GO:0044237;GO:…	nucleobase, nucleoside, nucleotide and nucleic acid metabolic process;transcription;regulation of transcription, DNA-dependent;proteolysis;nitrogen compound metabolic process;regulation of mitosis;regulation of mitotic cell cycle;metabolic process	hsa:23077;hsa:23077			K10693	0.739551	4.53719	0.27146	-4.28748	2.94315e-12	29.92	108.03	0.738043	4.49851	1.30077e-20	42.76	140.77	0.739551	4.53719
1885	982	982		2782;2783	3025;3026	10713	24967	o100806_RD463HCLSa_43i	5486	10712	24966	o100806_RD463HCLSa_41i	5505	IPI00295502;IPI00795546	IPI00295502	IPI00295502	Protein Wiz;Widely-interspaced zinc finger-containing protein;Zinc finger protein 803;cDNA FLJ16541 fis, clone OCBBF2034823, highly similar to Mus musculus widely-interspaced zinc finger motifs (Wiz), transcript variant 1, mRNA	WIZ;ZNF803	Isoform 1 of Protein Wiz;cDNA FLJ16541 fis, clone OCBBF2034823, highly similar to Mus musculus widely-interspaced zinc finger motifs (Wiz), transcript variant 1, mRNA	O95785-1;O95785;B3KVH1	ENST00000263381;ENST00000389282;ENST00000389282	PF00096;PF00096	zf-C2H2;zf-C2H2	Zinc finger, C2H2 type;Zinc finger, C2H2 type		GO:0005634;GO:0043226;GO:0043227;GO:0043229;GO:0043231;GO:0044424;GO:0044464;GO:0005622;GO:0044464	nucleus;organelle;membrane-bounded organelle;intracellular organelle;intracellular membrane-bounded organelle;intracellular part;cell part;intracellular;cell part	GO:0005488;GO:0008270;GO:0043167;GO:0043169;GO:0046872;GO:0046914;GO:0005488;GO:0008270;GO:0043167;GO:0043169;GO:0046872;GO:0046914	binding;zinc ion binding;ion binding;cation binding;metal ion binding;transition metal ion binding;binding;zinc ion binding;ion binding;cation binding;metal ion binding;transition metal ion binding			hsa:58525				0.83119	6.92301						0.83119	6.92301	0.000357819	19.37	97.936	0.5	0
1885	983	983		2782;2783	3025;3026	10709	24961	o101004_RD463HCLSb_i35	3361	10712	24966	o100806_RD463HCLSa_41i	5505	IPI00295502;IPI00795546	IPI00295502	IPI00295502	Protein Wiz;Widely-interspaced zinc finger-containing protein;Zinc finger protein 803;cDNA FLJ16541 fis, clone OCBBF2034823, highly similar to Mus musculus widely-interspaced zinc finger motifs (Wiz), transcript variant 1, mRNA	WIZ;ZNF803	Isoform 1 of Protein Wiz;cDNA FLJ16541 fis, clone OCBBF2034823, highly similar to Mus musculus widely-interspaced zinc finger motifs (Wiz), transcript variant 1, mRNA	O95785-1;O95785;B3KVH1	ENST00000263381;ENST00000389282;ENST00000389282	PF00096;PF00096	zf-C2H2;zf-C2H2	Zinc finger, C2H2 type;Zinc finger, C2H2 type		GO:0005634;GO:0043226;GO:0043227;GO:0043229;GO:0043231;GO:0044424;GO:0044464;GO:0005622;GO:0044464	nucleus;organelle;membrane-bounded organelle;intracellular organelle;intracellular membrane-bounded organelle;intracellular part;cell part;intracellular;cell part	GO:0005488;GO:0008270;GO:0043167;GO:0043169;GO:0046872;GO:0046914;GO:0005488;GO:0008270;GO:0043167;GO:0043169;GO:0046872;GO:0046914	binding;zinc ion binding;ion binding;cation binding;metal ion binding;transition metal ion binding;binding;zinc ion binding;ion binding;cation binding;metal ion binding;transition metal ion binding			hsa:58525				0.991116	20.4753						0.915956	10.3737	0.000357819	19.37	97.936	0.991116	20.4753
1658	389	389	Phosphoserine	6040;7170	6682;7918	28285	65828	o100802_RD463HCLSa_43i	5945	28286	65830	o101004_RD463HCLSb_i43	4180	IPI00295738;IPI00218566;IPI00218567;IPI00241935;IPI00909160;IPI00641808	IPI00295738	IPI00295738	Mitogen-activated protein kinase kinase kinase 7;Transforming growth factor-beta-activated kinase 1;Mitogen-activated protein kinase kinase kinase 7;Transforming growth factor-beta-activated kinase 1;Mitogen-activated protein kinase kinase kinase 7;Transforming growth factor-beta-activated kinase 1;Mitogen-activated protein kinase kinase kinase 7;TGF beta-activated kinase splice variant d;Mitogen…	MAP3K7;TAK1;MAP3K7;TAK1;MAP3K7;TAK1;TAK1;MAP3K7;RP1-154G14.1-004;hCG_32402;DKFZp586F0420;MAP3K7;RP1-154G14.1-006	Isoform 1B of Mitogen-activated protein kinase kinase kinase 7;Isoform 1A of Mitogen-activated protein kinase kinase kinase 7;Isoform 1C of Mitogen-activated protein kinase kinase kinase 7;mitogen-activated protein kinase kinase kinase 7 isoform D;cDNA FLJ	O43318-1;O43318;Q5U0C9;Q5U0D0;O43318-2;B2RE27;O43318-3;Q5TDT7;Q9NZ70;B4DRH8;Q9UG54	ENST00000369325;ENST00000369329;ENST00000369332;ENST00000369325;ENST00000369329;ENST00000369332;ENST00000369325;ENST00000369329;ENST00000369332;ENST00000369327;ENST00000369329;ENST00000369320;ENST00000369329;ENST00000369332	PF00069;PF00069;PF00069;PF00069;PF00069	Pkinase;Pkinase;Pkinase;Pkinase;Pkinase	Protein kinase domain;Protein kinase domain;Protein kinase domain;Protein kinase domain;Protein kinase domain	2EVA;2EVA;2EVA	GO:0005829;GO:0044424;GO:0044444;GO:0044464;GO:0005829;GO:0044424;GO:0044444;GO:0044464;GO:0005829;GO:0044424;GO:0044444;GO:0044464	cytosol;intracellular part;cytoplasmic part;cell part;cytosol;intracellular part;cytoplasmic part;cell part;cytosol;intracellular part;cytoplasmic part;cell part	GO:0000166;GO:0000287;GO:0001882;GO:0001883;GO:0003824;GO:0004672;GO:0004674;GO:0004702;GO:0004709;GO:0004713;GO:0004871;GO:0005057;GO:0005488;GO:0005515;GO:0005524;GO:0016301;GO:0016740;GO:0016772;GO:0016773;GO:0017076;GO:0030554;GO:0032553;GO:0032555;GO:0032559;GO:0043167;GO:0043169;GO:0046872;GO:0060089;GO:0000166;GO:0000287;GO:0001882;GO:0001883;GO:0003824;GO:0004672;GO:0004674;GO:0004702;GO:…	nucleotide binding;magnesium ion binding;nucleoside binding;purine nucleoside binding;catalytic activity;protein kinase activity;protein serine/threonine kinase activity;receptor signaling protein serine/threonine kinase activity	GO:0001817;GO:0001819;GO:0002253;GO:0002376;GO:0002429;GO:0002682;GO:0002684;GO:0002694;GO:0002696;GO:0002697;GO:0002699;GO:0002700;GO:0002702;GO:0002703;GO:0002705;GO:0002706;GO:0002708;GO:0002709;GO:0002711;GO:0002718;GO:0002720;GO:0002724;GO:0002726;GO:0002757;GO:0002764;GO:0002768;GO:0002819;GO:0002821;GO:0002822;GO:0002824;GO:0006464;GO:0006468;GO:0006793;GO:0006796;GO:0007154;GO:0007165;GO:…	regulation of cytokine production;positive regulation of cytokine production;activation of immune response;immune system process;immune response-activating cell surface receptor signaling pathway;regulation of immune system process	hsa:6885;hsa:6885;hsa:6885	ko04010;ko04310;ko04520;ko04620;ko04660	MAPK signaling pathway;Wnt signaling pathway;Adherens junction;Toll-like receptor signaling pathway;T cell receptor signaling pathway	K04427	1	105.48	1	105.48	4.80398e-62	43.8	210						1	90.2413
1937	608	608	Phosphoserine	370	402	1482	3403	o101004_RD463HCLSb_i51	4466	1482	3403	o101004_RD463HCLSb_i51	4466	IPI00299063	IPI00299063	IPI00299063	Stromal interaction molecule 1	STIM1;GOK	Stromal interaction molecule 1	Q13586	ENST00000300737	PF07647	SAM_2	SAM domain (Sterile alpha motif)	2K60	GO:0005887;GO:0016021;GO:0030176;GO:0031224;GO:0031226;GO:0031227;GO:0031300;GO:0031301;GO:0044422;GO:0044424;GO:0044425;GO:0044432;GO:0044444;GO:0044446;GO:0044459;GO:0044464	integral to plasma membrane;integral to membrane;integral to endoplasmic reticulum membrane;intrinsic to membrane;intrinsic to plasma membrane;intrinsic to endoplasmic reticulum membrane;intrinsic to organelle membrane;integral to organelle membrane	GO:0005488;GO:0005509;GO:0005515;GO:0043167;GO:0043169;GO:0046872	binding;calcium ion binding;protein binding;ion binding;cation binding;metal ion binding	GO:0005513;GO:0006810;GO:0006811;GO:0006812;GO:0006816;GO:0009593;GO:0010035;GO:0010038;GO:0010959;GO:0015674;GO:0022898;GO:0030001;GO:0032234;GO:0032236;GO:0032237;GO:0032409;GO:0032411;GO:0032412;GO:0032414;GO:0032879;GO:0034762;GO:0042221;GO:0043269;GO:0043270;GO:0044093;GO:0048518;GO:0050789;GO:0050794;GO:0050896;GO:0051049;GO:0051050;GO:0051234;GO:0051592;GO:0051606;GO:0051924;GO:0051928;GO:…	detection of calcium ion;transport;ion transport;cation transport;calcium ion transport;detection of chemical stimulus;response to inorganic substance;response to metal ion;regulation of metal ion transport;di-, tri-valent inorganic cation transport	hsa:6786				0.999988	52.0711											0.999988	52.0711
1948	2543	2543	Phosphoserine	7646	8480	30196	70370	o101004_RD463HCLSb_i39	4336	30196	70370	o101004_RD463HCLSb_i39	4336	IPI00299512;IPI00304235;IPI00790152;IPI00909675	IPI00299512	IPI00299512	Neurofibromin;Neurofibromatosis-related protein NF-1;Neurofibromin truncated;Neurofibromin;Neurofibromatosis-related protein NF-1;Neurofibromin truncated;NF1;cDNA FLJ54393, highly similar to Neurofibromin	NF1;NF1;NF1	Isoform 2 of Neurofibromin;Isoform 1 of Neurofibromin;Neurofibromin variant;cDNA FLJ54393, highly similar to Neurofibromin	P21359-1;P21359;P21359-2;A8K1M1;Q4W6X4;Q59FX3;B4DXH1	ENST00000356175;ENST00000358273;ENST00000356175;ENST00000358273;ENST00000356175;ENST00000358273;ENST00000356175;ENST00000358273	PF00616;PF00616;PF00616	RasGAP;RasGAP;RasGAP	GTPase-activator protein for Ras-like GTPase;GTPase-activator protein for Ras-like GTPase;GTPase-activator protein for Ras-like GTPase	1NF1;2D4Q;2E2X;1NF1;2D4Q;2E2X	GO:0005634;GO:0005737;GO:0030424;GO:0030425;GO:0042995;GO:0043005;GO:0043226;GO:0043227;GO:0043229;GO:0043231;GO:0044424;GO:0044464;GO:0005634;GO:0005737;GO:0030424;GO:0030425;GO:0042995;GO:0043005;GO:0043226;GO:0043227;GO:0043229;GO:0043231;GO:0044424;GO:0044464;GO:0005622;GO:0044464	nucleus;cytoplasm;axon;dendrite;cell projection;neuron projection;organelle;membrane-bounded organelle;intracellular organelle;intracellular membrane-bounded organelle;intracellular part;cell part;nucleus;cytoplasm;axon;dendrite;cell projection	GO:0005083;GO:0005096;GO:0005099;GO:0005488;GO:0005515;GO:0008047;GO:0030234;GO:0030695;GO:0060589;GO:0005083;GO:0005096;GO:0005099;GO:0005488;GO:0005515;GO:0008047;GO:0030234;GO:0030695;GO:0060589;GO:0005096;GO:0008047;GO:0030234;GO:0030695;GO:0060589	small GTPase regulator activity;GTPase activator activity;Ras GTPase activator activity;binding;protein binding;enzyme activator activity;enzyme regulator activity;GTPase regulator activity;nucleoside-triphosphatase regulator activity	GO:0000165;GO:0001649;GO:0001656;GO:0001666;GO:0001822;GO:0001889;GO:0001936;GO:0001937;GO:0001952;GO:0003008;GO:0006140;GO:0006469;GO:0006950;GO:0006996;GO:0007010;GO:0007049;GO:0007154;GO:0007165;GO:0007242;GO:0007243;GO:0007264;GO:0007265;GO:0007272;GO:0007406;GO:0007507;GO:0007610;GO:0007611;GO:0007612;GO:0007632;GO:0008285;GO:0008366;GO:0008542;GO:0009314;GO:0009416;GO:0009605;GO:0009611;GO:…	MAPKKK cascade;osteoblast differentiation;metanephros development;response to hypoxia;kidney development;liver development;regulation of endothelial cell proliferation;negative regulation of endothelial cell proliferation	hsa:4763;hsa:4763	ko04010	MAPK signaling pathway	K08052	1	130.637											1	130.637
1971	261	261		1856;1857	2035;2036	7441	17520	o100802_RD463HCLSa_41i	5317	7443	17523	o100702_RD463HSLCi_53	6077	IPI00301100;IPI00847535;IPI00910800	IPI00301100	IPI00301100	Solute carrier family 43 member 3;Protein FOAP-13;cDNA, FLJ92482, highly similar to Homo sapiens proteoglycan 2, bone marrow (natural killer cell activator, eosinophil granule major basic protein) (PRG2), mRNA;cDNA FLJ55251, highly similar to Homo sapiens solute carrier family 43, member 3 (SLC43A3), mRNA	SLC43A3;PSEC0252	cDNA FLJ54531, highly similar to Homo sapiens solute carrier family 43, member 3 (SLC43A3), mRNA;Similar to Solute carrier family 43 member 3;cDNA FLJ55251, highly similar to Homo sapiens solute carrier family 43, member 3 (SLC43A3), mRNA	Q8NBI5;A8K2X6;B0AZP8;B4DNR8;B2R5I1;B4DV87	ENST00000352187;ENST00000395123;ENST00000395124;ENST00000311862	PF07690;PF00059	MFS_1;Lectin_C	Major Facilitator Superfamily;Lectin C-type domain		GO:0016021;GO:0031224;GO:0044425;GO:0044464	integral to membrane;intrinsic to membrane;membrane part;cell part	GO:0005488	binding	GO:0002376;GO:0006955;GO:0050896	immune system process;immune response;response to stimulus	hsa:29015			K08230	0.999849	38.2143	0.999849	38.2143	0.0615466	24.23	58.94	0.999174	30.8279	0.284576	29.02	41.668
2033	454	454	Phosphoserine	872	953;954	3594	8442	o101004_RD463HCLSb_i55	3307	3594	8442	o101004_RD463HCLSb_i55	3307	IPI00304742	IPI00304742	IPI00304742	Serine/threonine-protein kinase 10;Lymphocyte-oriented kinase	STK10;LOK	Serine/threonine-protein kinase 10	O94804;B2R8F5;B3KMY1;Q6NSK0	ENST00000176763	PF00069	Pkinase	Protein kinase domain	2J7T			GO:0000166;GO:0001882;GO:0001883;GO:0003824;GO:0004672;GO:0004674;GO:0005488;GO:0005524;GO:0016301;GO:0016740;GO:0016772;GO:0016773;GO:0017076;GO:0030554;GO:0032553;GO:0032555;GO:0032559	nucleotide binding;nucleoside binding;purine nucleoside binding;catalytic activity;protein kinase activity;protein serine/threonine kinase activity;binding;ATP binding;kinase activity;transferase activity	GO:0006464;GO:0006468;GO:0006793;GO:0006796;GO:0008152;GO:0009987;GO:0016310;GO:0019538;GO:0034960;GO:0043170;GO:0043283;GO:0043412;GO:0043687;GO:0044237;GO:0044238;GO:0044260;GO:0044267	protein modification process;protein amino acid phosphorylation;phosphorus metabolic process;phosphate metabolic process;metabolic process;cellular process;phosphorylation;protein metabolic process;cellular biopolymer metabolic process	hsa:6793			K08837	0.99822	27.4898	0.954784	13.2461	1.39108e-92	55.84	238.03	0.997032	25.5132	1.11903e-76	62.64	224.79	0.99822	27.4898
2045	483	483	Phosphoserine	6534	7230	26178	60952	o100702_RD463HSLCi_43	7353	26178	60952	o100702_RD463HSLCi_43	7353	IPI00305589	IPI00305589	IPI00305589	6-phosphofructo-2-kinase/fructose-2,6-biphosphatase 2;PFK-2/FBPase-2;6PF-2-K/Fru-2,6-P2ASE heart-type isozyme;6-phosphofructo-2-kinase;Fructose-2,6-bisphosphatase	PFKFB2	Isoform 1 of 6-phosphofructo-2-kinase/fructose-2,6-biphosphatase 2	O60825-1;O60825;B0FLL2;Q68DE0	ENST00000367079;ENST00000367080	PF01591;PF00300	6PF2K;PGAM	6-phosphofructo-2-kinase;Phosphoglycerate mutase family		GO:0005829;GO:0044424;GO:0044444;GO:0044464	cytosol;intracellular part;cytoplasmic part;cell part	GO:0000166;GO:0001882;GO:0001883;GO:0003824;GO:0003873;GO:0004331;GO:0005488;GO:0005524;GO:0008443;GO:0016301;GO:0016740;GO:0016772;GO:0016773;GO:0016787;GO:0016788;GO:0016791;GO:0017076;GO:0019200;GO:0019203;GO:0030554;GO:0032553;GO:0032555;GO:0032559;GO:0042578	nucleotide binding;nucleoside binding;purine nucleoside binding;catalytic activity;6-phosphofructo-2-kinase activity;fructose-2,6-bisphosphate 2-phosphatase activity;binding;ATP binding;phosphofructokinase activity;kinase activity;transferase activity	GO:0005975;GO:0005996;GO:0006000;GO:0006003;GO:0006066;GO:0008152;GO:0019318;GO:0044238	carbohydrate metabolic process;monosaccharide metabolic process;fructose metabolic process;fructose 2,6-bisphosphate metabolic process;alcohol metabolic process;metabolic process;hexose metabolic process;primary metabolic process	hsa:5208	ko00051	Fructose and mannose metabolism	K00900;K01103	0.999982	47.4162	0.997101	25.3751	0.00255002	26.55	72.844	0.999653	34.5972	2.19021e-05	34.2	103.48	0.999653	34.5972
2053	266	266		5305;5306	5822;5823	21471	50540	o101004_RD463HCLSb_i43	2270	21475	50549	o100802_RD463HCLSa_41i	5485	IPI00306195;IPI00549786	IPI00306195	IPI00306195	Proline-rich AKT1 substrate 1;40 kDa proline-rich AKT substrate;Proline-rich AKT1 substrate 1;40 kDa proline-rich AKT substrate	AKT1S1;PRAS40;AKT1S1;PRAS40	Isoform 2 of Proline-rich AKT1 substrate 1;Isoform 1 of Proline-rich AKT1 substrate 1	Q96B36-2;Q96B36;Q96B36-1;B2RE93	ENST00000344175;ENST00000391831;ENST00000391832;ENST00000391833;ENST00000391834;ENST00000391835;ENST00000344175;ENST00000391831;ENST00000391832;ENST00000391833;ENST00000391834;ENST00000391835					GO:0044424;GO:0044444;GO:0044445;GO:0044464;GO:0044424;GO:0044444;GO:0044445;GO:0044464	intracellular part;cytoplasmic part;cytosolic part;cell part;intracellular part;cytoplasmic part;cytosolic part;cell part			GO:0006916;GO:0010468;GO:0010941;GO:0019222;GO:0042981;GO:0043066;GO:0043067;GO:0043069;GO:0043523;GO:0043526;GO:0045884;GO:0048519;GO:0048523;GO:0050789;GO:0050793;GO:0050794;GO:0051093;GO:0060255;GO:0060548;GO:0065007;GO:0006916;GO:0010468;GO:0010941;GO:0019222;GO:0042981;GO:0043066;GO:0043067;GO:0043069;GO:0043523;GO:0043526;GO:0045884;GO:0048519;GO:0048523;GO:0050789;GO:0050793;GO:0050794;GO:…	anti-apoptosis;regulation of gene expression;regulation of cell death;regulation of metabolic process;regulation of apoptosis;negative regulation of apoptosis;regulation of programmed cell death;negative regulation of programmed cell death	hsa:84335;hsa:84335				0.999944	42.5394	0.997927	26.8255	5.63586e-18	45.96	147.5	0.998901	29.5851	1.50077e-08	43.34	120.67	0.999944	42.5394
2076	419	419		4663	5124	18796	44474	o100702_RD463HSLCi_41	3933	18796	44474	o100702_RD463HSLCi_41	3933	IPI00307683;IPI00794410;IPI00794822	IPI00307683	IPI00307683	Sentrin-specific protease 2;Sentrin/SUMO-specific protease SENP2;SMT3-specific isopeptidase 2;Axam2;cDNA FLJ60649, highly similar to Sentrin-specific protease 2 (EC 3.4.22.-)	SENP2;KIAA1331	cDNA FLJ54905, highly similar to Sentrin-specific protease 2;cDNA FLJ60649, highly similar to Sentrin-specific protease 2;23 kDa protein	Q9HC62;B4DKY9;B4DQ42;B4E2S4;B4DKW6	ENST00000296257	PF02902;PF02902	Peptidase_C48;Peptidase_C48	Ulp1 protease family, C-terminal catalytic domain;Ulp1 protease family, C-terminal catalytic domain	1TGZ;1TH0;2IO0;2IO1;2IO2;2IO3	GO:0005643;GO:0005737;GO:0016020;GO:0031090;GO:0031965;GO:0032991;GO:0043234;GO:0044422;GO:0044424;GO:0044425;GO:0044428;GO:0044446;GO:0044464;GO:0046930	nuclear pore;cytoplasm;membrane;organelle membrane;nuclear membrane;macromolecular complex;protein complex;organelle part;intracellular part;membrane part;nuclear part;intracellular organelle part;cell part;pore complex	GO:0003824;GO:0005488;GO:0005515;GO:0008233;GO:0008234;GO:0016787;GO:0016929;GO:0019783;GO:0070011;GO:0003824;GO:0008233;GO:0008234;GO:0016787;GO:0070011	catalytic activity;binding;protein binding;peptidase activity;cysteine-type peptidase activity;hydrolase activity;SUMO-specific protease activity;small conjugating protein-specific protease activity;peptidase activity, acting on L-amino acid peptides	GO:0006508;GO:0006810;GO:0006886;GO:0007154;GO:0007165;GO:0007166;GO:0008152;GO:0009056;GO:0009057;GO:0009966;GO:0009987;GO:0010646;GO:0015031;GO:0015931;GO:0016055;GO:0019538;GO:0019941;GO:0030111;GO:0030163;GO:0034960;GO:0034962;GO:0043170;GO:0043283;GO:0043285;GO:0043632;GO:0044237;GO:0044238;GO:0044248;GO:0044257;GO:0044260;GO:0044265;GO:0044267;GO:0045184;GO:0046907;GO:0050657;GO:0050658;GO:…	proteolysis;transport;intracellular protein transport;cell communication;signal transduction;cell surface receptor linked signal transduction;metabolic process;catabolic process;macromolecule catabolic process;regulation of signal transduction	hsa:59343	ko04310	Wnt signaling pathway	K03345	0.999977	46.3378											0.976291	16.1466
2084	758	758	Phosphoserine	7156	7903	28201	65616	o101004_RD463HCLSb_i49	4619	28201	65616	o101004_RD463HCLSb_i49	4619	IPI00328306;IPI00455725;IPI00914574;IPI00643950	IPI00328306	IPI00328306	Zinc finger CCCH domain-containing protein 11A;cDNA FLJ60373, highly similar to Zinc finger CCCH domain-containing protein11A	ZC3H11A;KIAA0663;ZC3HDC11A	Zinc finger CCCH domain-containing protein 11A;cDNA FLJ60373, highly similar to Zinc finger CCCH domain-containing protein11A;Uncharacterized protein ENSP00000381583;Uncharacterized protein ENSP00000356180	O75152;B4DLG2;B4DYM8;A8MYP7;A8MQ28	ENST00000332127;ENST00000367210;ENST00000367212;ENST00000367214;ENST00000332127;ENST00000367210;ENST00000367212;ENST00000367214							GO:0003676;GO:0005488;GO:0008270;GO:0043167;GO:0043169;GO:0046872;GO:0046914;GO:0003676;GO:0005488;GO:0008270;GO:0043167;GO:0043169;GO:0046872;GO:0046914	nucleic acid binding;binding;zinc ion binding;ion binding;cation binding;metal ion binding;transition metal ion binding;nucleic acid binding;binding;zinc ion binding;ion binding;cation binding;metal ion binding;transition metal ion binding			hsa:9877				0.978883	16.7053											0.978883	16.7053
2088	19	19		10163	11288	40409	94170	o100702_RD463HSLCi_47	6646	40409	94170	o100702_RD463HSLCi_47	6646	IPI00328342	IPI00328342	IPI00328342	Sodium bicarbonate cotransporter 3;Sodium bicarbonate cotransporter 2;Sodium bicarbonate cotransporter 2b;Solute carrier family 4 member 7	SLC4A7;BT;NBC2;NBC2B;NBC3;SBC2;SLC4A6	Solute carrier family 4 sodium bicarbonate cotransporter member 7	Q9Y6M7-1;Q9Y6M7;A6NIA8;B5M449;B5M450;B5M451;B5M453;B6DY52	ENST00000295736;ENST00000349751;ENST00000388777	PF07565;PF00955	Band_3_cyto;HCO3_cotransp	Band 3 cytoplasmic domain;HCO3- transporter family		GO:0005902;GO:0016021;GO:0016323;GO:0016324;GO:0031224;GO:0032420;GO:0042995;GO:0044422;GO:0044424;GO:0044425;GO:0044459;GO:0044464	microvillus;integral to membrane;basolateral plasma membrane;apical plasma membrane;intrinsic to membrane;stereocilium;cell projection;organelle part;intracellular part;membrane part;plasma membrane part;cell part	GO:0005215;GO:0005452;GO:0005488;GO:0005515;GO:0008324;GO:0008509;GO:0008510;GO:0015075;GO:0015103;GO:0015106;GO:0015108;GO:0015291;GO:0015293;GO:0015294;GO:0015296;GO:0015297;GO:0015301;GO:0015380;GO:0022804;GO:0022857;GO:0022891;GO:0022892;GO:0031402;GO:0031420;GO:0043167;GO:0043169;GO:0046872	transporter activity;inorganic anion exchanger activity;binding;protein binding;cation transmembrane transporter activity;anion transmembrane transporter activity;sodium:bicarbonate symporter activity;ion transmembrane transporter activity	GO:0006810;GO:0006811;GO:0006812;GO:0006814;GO:0006820;GO:0015672;GO:0015698;GO:0015701;GO:0015711;GO:0030001;GO:0051234	transport;ion transport;cation transport;sodium ion transport;anion transport;monovalent inorganic cation transport;inorganic anion transport;bicarbonate transport;organic anion transport;metal ion transport;establishment of localization					0.917969	10.4885	0.5	0	4.99734e-05	33.7	101.13
2121	857	857		798;1450	866;1590	3140	7360	o100702_RD463HSLCi_43	5368	5965	14052	o100806_RD463HCLSa_49i	7039	IPI00329668;IPI00643294;IPI00893992	IPI00329668	IPI00329668	RAS protein activator like-3;RAS protein activator like-3	RASAL3;RASAL3	Isoform 1 of Probable Ras GTPase-activating protein FLJ21438;111 kDa protein;Isoform 2 of Probable Ras GTPase-activating protein FLJ21438	Q86YV0-1;Q86YV0;Q9H7J2;Q86YV0-2	ENST00000343625;ENST00000343625	PF00168;PF00616;PF00168;PF00616	C2;RasGAP;C2;RasGAP	C2 domain;GTPase-activator protein for Ras-like GTPase;C2 domain;GTPase-activator protein for Ras-like GTPase		GO:0005622;GO:0044464;GO:0005622;GO:0044464	intracellular;cell part;intracellular;cell part	GO:0005096;GO:0008047;GO:0030234;GO:0030695;GO:0060589;GO:0005096;GO:0008047;GO:0030234;GO:0030695;GO:0060589	GTPase activator activity;enzyme activator activity;enzyme regulator activity;GTPase regulator activity;nucleoside-triphosphatase regulator activity;GTPase activator activity;enzyme activator activity;enzyme regulator activity;GTPase regulator activity	GO:0007154;GO:0007165;GO:0009966;GO:0009987;GO:0010646;GO:0050789;GO:0050794;GO:0051056;GO:0065007;GO:0007154;GO:0007165;GO:0009966;GO:0009987;GO:0010646;GO:0050789;GO:0050794;GO:0051056;GO:0065007	cell communication;signal transduction;regulation of signal transduction;cellular process;regulation of cell communication;regulation of biological process;regulation of cellular process;regulation of small GTPase mediated signal transduction	hsa:64926;hsa:64926				0.854286	9.57547	0.57579	3.62957	0.036305	29.87	57.73	0.493549	0	0.00822128	28.67	73.723	0.187948	-6.25101
2148	1011	1011	Phosphothreonine	9104	10116	35972	84103	o100702_RD463HSLCi_47	3656	35972	84103	o100702_RD463HSLCi_47	3656	IPI00337426;IPI00888725;IPI00395333	IPI00337426	IPI00337426	BMP-2-inducible protein kinase;Putative BMP-2-inducible kinase-like protein	BMP2K;BIKE;HRIHFB2017;BMP2KL	Isoform 1 of BMP-2-inducible protein kinase;similar to BMP2 inducible kinase-like;Putative BMP-2-inducible kinase-like protein	Q9NSY1-1;Q9NSY1;Q5H9B9	ENST00000264889;ENST00000335016;ENST00000389010;ENST00000373488	PF00069	Pkinase	Protein kinase domain		GO:0005634;GO:0043226;GO:0043227;GO:0043229;GO:0043231;GO:0044424;GO:0044464	nucleus;organelle;membrane-bounded organelle;intracellular organelle;intracellular membrane-bounded organelle;intracellular part;cell part	GO:0000166;GO:0001882;GO:0001883;GO:0003824;GO:0004672;GO:0004674;GO:0005488;GO:0005524;GO:0016301;GO:0016740;GO:0016772;GO:0016773;GO:0017076;GO:0030554;GO:0032553;GO:0032555;GO:0032559	nucleotide binding;nucleoside binding;purine nucleoside binding;catalytic activity;protein kinase activity;protein serine/threonine kinase activity;binding;ATP binding;kinase activity;transferase activity	GO:0006464;GO:0006468;GO:0006793;GO:0006796;GO:0008152;GO:0009987;GO:0016310;GO:0019538;GO:0034960;GO:0043170;GO:0043283;GO:0043412;GO:0043687;GO:0044237;GO:0044238;GO:0044260;GO:0044267	protein modification process;protein amino acid phosphorylation;phosphorus metabolic process;phosphate metabolic process;metabolic process;cellular process;phosphorylation;protein metabolic process;cellular biopolymer metabolic process	hsa:55589			K08854	0.983306	17.7016						0.113203	-8.93947	0.288121	5.2	49.587	0.868018	8.19313
2201	383	383	Phosphoserine	8790	9779	34697	81054	o100702_RD463HSLCi_33	8717	34697	81054	o100702_RD463HSLCi_33	8717	IPI00384250;IPI00796479;IPI00790973	IPI00384250	IPI00384250	cAMP-regulated phosphoprotein 21;Thymocyte cAMP-regulated phosphoprotein;cAMP-regulated phosphoprotein 21;Thymocyte cAMP-regulated phosphoprotein;cAMP-regulated phosphoprotein 21;Thymocyte cAMP-regulated phosphoprotein	ARPP21;TARPP;ARPP21;TARPP;ARPP21;TARPP	Isoform 1 of cAMP-regulated phosphoprotein 21;Isoform 3 of cAMP-regulated phosphoprotein 21;Isoform 4 of cAMP-regulated phosphoprotein 21	Q9UBL0-1;Q9UBL0;Q9UBL0-3;B4DG96;Q9UBL0-4;A8K0T4	ENST00000187397;ENST00000337271;ENST00000396481;ENST00000396482;ENST00000187397;ENST00000337271;ENST00000396481;ENST00000396482;ENST00000187397;ENST00000337271;ENST00000396481;ENST00000396482	PF01424;PF01424;PF01424	R3H;R3H;R3H	R3H domain;R3H domain;R3H domain		GO:0005737;GO:0044424;GO:0044464;GO:0005737;GO:0044424;GO:0044464;GO:0005737;GO:0044424;GO:0044464	cytoplasm;intracellular part;cell part;cytoplasm;intracellular part;cell part;cytoplasm;intracellular part;cell part	GO:0003676;GO:0005488;GO:0003676;GO:0005488;GO:0003676;GO:0005488	nucleic acid binding;binding;nucleic acid binding;binding;nucleic acid binding;binding							0.999985	48.2131	0.977899	16.4589	2.85397e-16	84.71	166.7	0.977899	16.4589	6.44953e-26	71.11	166.7	0.977899	16.4589
2251	677	677	Phosphoserine	6935	7660	27433	63793	o101004_RD463HCLSb_i41	2303	27433	63793	o101004_RD463HCLSb_i41	2303	IPI00396218;IPI00797048	IPI00396218	IPI00396218	SCY1-like protein 2;Coated vesicle-associated kinase of 104 kDa	SCYL2;CVAK104;KIAA1360	SCY1-like protein 2;85 kDa protein	Q6P3W7;A8KAB5	ENST00000360820	PF00069	Pkinase	Protein kinase domain		GO:0005794;GO:0010008;GO:0016020;GO:0016023;GO:0030135;GO:0030136;GO:0031090;GO:0031410;GO:0031982;GO:0031988;GO:0043226;GO:0043227;GO:0043229;GO:0043231;GO:0044422;GO:0044424;GO:0044440;GO:0044444;GO:0044446;GO:0044464;GO:0048471	Golgi apparatus;endosome membrane;membrane;cytoplasmic membrane-bounded vesicle;coated vesicle;clathrin-coated vesicle;organelle membrane;cytoplasmic vesicle;vesicle;membrane-bounded vesicle;organelle;membrane-bounded organelle;intracellular organelle	GO:0000166;GO:0001882;GO:0001883;GO:0003824;GO:0004672;GO:0005488;GO:0005524;GO:0016301;GO:0016740;GO:0016772;GO:0016773;GO:0017076;GO:0030554;GO:0032553;GO:0032555;GO:0032559	nucleotide binding;nucleoside binding;purine nucleoside binding;catalytic activity;protein kinase activity;binding;ATP binding;kinase activity;transferase activity;transferase activity, transferring phosphorus-containing groups	GO:0006464;GO:0006468;GO:0006793;GO:0006796;GO:0008152;GO:0009987;GO:0016310;GO:0019538;GO:0034960;GO:0043170;GO:0043283;GO:0043412;GO:0043687;GO:0044237;GO:0044238;GO:0044260;GO:0044267	protein modification process;protein amino acid phosphorylation;phosphorus metabolic process;phosphate metabolic process;metabolic process;cellular process;phosphorylation;protein metabolic process;cellular biopolymer metabolic process	hsa:55681				0.99997	45.2027											0.99997	45.2027
1530	559	559		9370	10404	37022	86601	o101004_RD463HCLSb_i57	1503	37013	86578	o100702_RD463HSLCi_57	3328	IPI00396552;IPI00218604;IPI00183046	IPI00396552	IPI00396552	Tyrosine-protein phosphatase non-receptor type 6;Protein-tyrosine phosphatase 1C;Hematopoietic cell protein-tyrosine phosphatase;SH-PTP1;Protein-tyrosine phosphatase SHP-1;Tyrosine-protein phosphatase non-receptor type 6;Protein-tyrosine phosphatase 1C;Hematopoietic cell protein-tyrosine phosphatase;SH-PTP1;Protein-tyrosine phosphatase SHP-1;Tyrosine-protein phosphatase non-receptor type 6;Protei…	PTPN6;HCP;PTP1C;PTPN6;HCP;PTP1C;PTPN6;HCP;PTP1C	Isoform 2 of Tyrosine-protein phosphatase non-receptor type 6;Isoform 1 of Tyrosine-protein phosphatase non-receptor type 6;Isoform 3 of Tyrosine-protein phosphatase non-receptor type 6	P29350-3;P29350;Q53EL0;Q53XS4;P29350-1;A8K306;B4DPS0;B4DTD7;P29350-2	ENST00000318974;ENST00000399448;ENST00000318974;ENST00000399448;ENST00000318974;ENST00000399448	PF00017;PF00102;PF00017;PF00102;PF00017;PF00102	SH2;Y_phosphatase;SH2;Y_phosphatase;SH2;Y_phosphatase	SH2 domain;Protein-tyrosine phosphatase;SH2 domain;Protein-tyrosine phosphatase;SH2 domain;Protein-tyrosine phosphatase	1FPR;1GWZ;1X6C;2B3O;2RMX;2YU7;1FPR;1GWZ;1X6C;2B3O;2RMX;2YU7;1FPR;1GWZ;1X6C;2B3O;2RMX;2YU7	GO:0005634;GO:0005829;GO:0016020;GO:0043226;GO:0043227;GO:0043229;GO:0043231;GO:0044424;GO:0044444;GO:0044464;GO:0005634;GO:0005829;GO:0016020;GO:0043226;GO:0043227;GO:0043229;GO:0043231;GO:0044424;GO:0044444;GO:0044464;GO:0005634;GO:0005829;GO:0016020;GO:0043226;GO:0043227;GO:0043229;GO:0043231;GO:0044424;GO:0044444;GO:0044464	nucleus;cytosol;membrane;organelle;membrane-bounded organelle;intracellular organelle;intracellular membrane-bounded organelle;intracellular part;cytoplasmic part;cell part;nucleus;cytosol;membrane;organelle;membrane-bounded organelle	GO:0003824;GO:0004721;GO:0004725;GO:0005488;GO:0005515;GO:0016787;GO:0016788;GO:0016791;GO:0042578;GO:0003824;GO:0004721;GO:0004725;GO:0005488;GO:0005515;GO:0016787;GO:0016788;GO:0016791;GO:0042578;GO:0003824;GO:0004721;GO:0004725;GO:0005488;GO:0005515;GO:0016787;GO:0016788;GO:0016791;GO:0042578	catalytic activity;phosphoprotein phosphatase activity;protein tyrosine phosphatase activity;binding;protein binding;hydrolase activity;hydrolase activity, acting on ester bonds;phosphatase activity;phosphoric ester hydrolase activity;catalytic activity	GO:0006464;GO:0006470;GO:0006793;GO:0006796;GO:0006915;GO:0007154;GO:0007165;GO:0007166;GO:0007186;GO:0008152;GO:0008219;GO:0009987;GO:0012501;GO:0016265;GO:0016311;GO:0019538;GO:0034960;GO:0043170;GO:0043283;GO:0043412;GO:0043687;GO:0044237;GO:0044238;GO:0044260;GO:0044267;GO:0050789;GO:0050794;GO:0065007;GO:0006464;GO:0006470;GO:0006793;GO:0006796;GO:0006915;GO:0007154;GO:0007165;GO:0007166;GO:…	protein modification process;protein amino acid dephosphorylation;phosphorus metabolic process;phosphate metabolic process;apoptosis;cell communication;signal transduction;cell surface receptor linked signal transduction	hsa:5777;hsa:5777;hsa:5777	ko04630;ko04520;ko04650;ko04660;ko04662	Jak-STAT signaling pathway;Adherens junction;Natural killer cell mediated cytotoxicity;T cell receptor signaling pathway;B cell receptor signaling pathway	K05697	0.818483	8.64337											0.818483	8.64337
1530	557	557		9370	10404	37023	86603	o101004_RD463HCLSb_i57	1518	37013	86578	o100702_RD463HSLCi_57	3328	IPI00396552;IPI00218604;IPI00183046	IPI00396552	IPI00396552	Tyrosine-protein phosphatase non-receptor type 6;Protein-tyrosine phosphatase 1C;Hematopoietic cell protein-tyrosine phosphatase;SH-PTP1;Protein-tyrosine phosphatase SHP-1;Tyrosine-protein phosphatase non-receptor type 6;Protein-tyrosine phosphatase 1C;Hematopoietic cell protein-tyrosine phosphatase;SH-PTP1;Protein-tyrosine phosphatase SHP-1;Tyrosine-protein phosphatase non-receptor type 6;Protei…	PTPN6;HCP;PTP1C;PTPN6;HCP;PTP1C;PTPN6;HCP;PTP1C	Isoform 2 of Tyrosine-protein phosphatase non-receptor type 6;Isoform 1 of Tyrosine-protein phosphatase non-receptor type 6;Isoform 3 of Tyrosine-protein phosphatase non-receptor type 6	P29350-3;P29350;Q53EL0;Q53XS4;P29350-1;A8K306;B4DPS0;B4DTD7;P29350-2	ENST00000318974;ENST00000399448;ENST00000318974;ENST00000399448;ENST00000318974;ENST00000399448	PF00017;PF00102;PF00017;PF00102;PF00017;PF00102	SH2;Y_phosphatase;SH2;Y_phosphatase;SH2;Y_phosphatase	SH2 domain;Protein-tyrosine phosphatase;SH2 domain;Protein-tyrosine phosphatase;SH2 domain;Protein-tyrosine phosphatase	1FPR;1GWZ;1X6C;2B3O;2RMX;2YU7;1FPR;1GWZ;1X6C;2B3O;2RMX;2YU7;1FPR;1GWZ;1X6C;2B3O;2RMX;2YU7	GO:0005634;GO:0005829;GO:0016020;GO:0043226;GO:0043227;GO:0043229;GO:0043231;GO:0044424;GO:0044444;GO:0044464;GO:0005634;GO:0005829;GO:0016020;GO:0043226;GO:0043227;GO:0043229;GO:0043231;GO:0044424;GO:0044444;GO:0044464;GO:0005634;GO:0005829;GO:0016020;GO:0043226;GO:0043227;GO:0043229;GO:0043231;GO:0044424;GO:0044444;GO:0044464	nucleus;cytosol;membrane;organelle;membrane-bounded organelle;intracellular organelle;intracellular membrane-bounded organelle;intracellular part;cytoplasmic part;cell part;nucleus;cytosol;membrane;organelle;membrane-bounded organelle	GO:0003824;GO:0004721;GO:0004725;GO:0005488;GO:0005515;GO:0016787;GO:0016788;GO:0016791;GO:0042578;GO:0003824;GO:0004721;GO:0004725;GO:0005488;GO:0005515;GO:0016787;GO:0016788;GO:0016791;GO:0042578;GO:0003824;GO:0004721;GO:0004725;GO:0005488;GO:0005515;GO:0016787;GO:0016788;GO:0016791;GO:0042578	catalytic activity;phosphoprotein phosphatase activity;protein tyrosine phosphatase activity;binding;protein binding;hydrolase activity;hydrolase activity, acting on ester bonds;phosphatase activity;phosphoric ester hydrolase activity;catalytic activity	GO:0006464;GO:0006470;GO:0006793;GO:0006796;GO:0006915;GO:0007154;GO:0007165;GO:0007166;GO:0007186;GO:0008152;GO:0008219;GO:0009987;GO:0012501;GO:0016265;GO:0016311;GO:0019538;GO:0034960;GO:0043170;GO:0043283;GO:0043412;GO:0043687;GO:0044237;GO:0044238;GO:0044260;GO:0044267;GO:0050789;GO:0050794;GO:0065007;GO:0006464;GO:0006470;GO:0006793;GO:0006796;GO:0006915;GO:0007154;GO:0007165;GO:0007166;GO:…	protein modification process;protein amino acid dephosphorylation;phosphorus metabolic process;phosphate metabolic process;apoptosis;cell communication;signal transduction;cell surface receptor linked signal transduction	hsa:5777;hsa:5777;hsa:5777	ko04630;ko04520;ko04650;ko04660;ko04662	Jak-STAT signaling pathway;Adherens junction;Natural killer cell mediated cytotoxicity;T cell receptor signaling pathway;B cell receptor signaling pathway	K05697	0.623864	5.20774											0.623864	5.20774
2129	284	284	Phosphoserine	847;7499	925;8300	3500	8233	o101004_RD463HCLSb_i41	5195	3500	8233	o101004_RD463HCLSb_i41	5195	IPI00410067;IPI00332936;IPI00410069	IPI00410067	IPI00410067	Zinc finger CCCH-type antiviral protein 1;Zinc finger CCCH domain-containing protein 2;Zinc finger antiviral protein;Zinc finger CCCH-type antiviral protein 1;Zinc finger CCCH domain-containing protein 2;Zinc finger antiviral protein;Zinc finger CCCH-type antiviral protein 1;Zinc finger CCCH domain-containing protein 2;Zinc finger antiviral protein	ZC3HAV1;ZC3HDC2;PRO1677;ZC3HAV1;ZC3HDC2;PRO1677;ZC3HAV1;ZC3HDC2;PRO1677	Isoform 1 of Zinc finger CCCH-type antiviral protein 1;Isoform 2 of Zinc finger CCCH-type antiviral protein 1;Isoform 3 of Zinc finger CCCH-type antiviral protein 1	Q7Z2W4-1;Q7Z2W4;A4D1S4;A8K9U6;Q7Z2W4-2;A4D1R2;Q7Z2W4-3	ENST00000242351;ENST00000242351;ENST00000242351	PF00644;PF00642;PF00644;PF00642;PF00644;PF00642	PARP;zf-CCCH;PARP;zf-CCCH;PARP;zf-CCCH	Poly(ADP-ribose) polymerase catalytic domain;Zinc finger C-x8-C-x5-C-x3-H type (and similar);Poly(ADP-ribose) polymerase catalytic domain;Zinc finger C-x8-C-x5-C-x3-H type (and similar);Poly(ADP-ribose) polymerase catalytic domain;Zinc finger C-x8-C-x5-C-x3-H type (and similar)		GO:0005634;GO:0005737;GO:0043226;GO:0043227;GO:0043229;GO:0043231;GO:0044424;GO:0044464;GO:0005634;GO:0005737;GO:0043226;GO:0043227;GO:0043229;GO:0043231;GO:0044424;GO:0044464;GO:0005634;GO:0005737;GO:0043226;GO:0043227;GO:0043229;GO:0043231;GO:0044424;GO:0044464	nucleus;cytoplasm;organelle;membrane-bounded organelle;intracellular organelle;intracellular membrane-bounded organelle;intracellular part;cell part;nucleus;cytoplasm;organelle;membrane-bounded organelle;intracellular organelle	GO:0003676;GO:0003723;GO:0003824;GO:0003950;GO:0005488;GO:0008270;GO:0016740;GO:0016757;GO:0016763;GO:0043167;GO:0043169;GO:0046872;GO:0046914;GO:0003676;GO:0003723;GO:0003824;GO:0003950;GO:0005488;GO:0008270;GO:0016740;GO:0016757;GO:0016763;GO:0043167;GO:0043169;GO:0046872;GO:0046914;GO:0003676;GO:0003723;GO:0003824;GO:0003950;GO:0005488;GO:0008270;GO:0016740;GO:0016757;GO:0016763;GO:0043167;GO:…	nucleic acid binding;RNA binding;catalytic activity;NAD+ ADP-ribosyltransferase activity;binding;zinc ion binding;transferase activity;transferase activity, transferring glycosyl groups;transferase activity, transferring pentosyl groups;ion binding	GO:0009607;GO:0009615;GO:0050896;GO:0051704;GO:0051707;GO:0009607;GO:0009615;GO:0050896;GO:0051704;GO:0051707;GO:0009607;GO:0009615;GO:0050896;GO:0051704;GO:0051707	response to biotic stimulus;response to virus;response to stimulus;multi-organism process;response to other organism;response to biotic stimulus;response to virus;response to stimulus;multi-organism process;response to other organism	hsa:56829;hsa:56829;hsa:56829				1	137.147	0.496632	0	0.00255451	17.38	57.797						1	137.147
2368	141	141	Phosphoserine	10506	11671	41774	97314	o100702_RD463HSLCi_33	7155	41775	97315	o100802_RD463HCLSa_33i	6646	IPI00419979	IPI00419979	IPI00419979	Serine/threonine-protein kinase PAK 2;p21-activated kinase 2;Gamma-PAK;PAK65;S6/H4 kinase;p58;PAK-2p27;PAK-2p34;C-t-PAK2	PAK2	Serine/threonine-protein kinase PAK 2	Q13177;A8K5M4	ENST00000327134	PF00786;PF00069	PBD;Pkinase	P21-Rho-binding domain;Protein kinase domain		GO:0005634;GO:0005829;GO:0016020;GO:0043226;GO:0043227;GO:0043229;GO:0043231;GO:0044424;GO:0044444;GO:0044464;GO:0048471	nucleus;cytosol;membrane;organelle;membrane-bounded organelle;intracellular organelle;intracellular membrane-bounded organelle;intracellular part;cytoplasmic part;cell part;perinuclear region of cytoplasm	GO:0000166;GO:0001882;GO:0001883;GO:0003824;GO:0004672;GO:0004674;GO:0005488;GO:0005515;GO:0005524;GO:0016301;GO:0016740;GO:0016772;GO:0016773;GO:0017076;GO:0030554;GO:0032553;GO:0032555;GO:0032559;GO:0042802	nucleotide binding;nucleoside binding;purine nucleoside binding;catalytic activity;protein kinase activity;protein serine/threonine kinase activity;binding;protein binding;ATP binding;kinase activity;transferase activity	GO:0006464;GO:0006468;GO:0006469;GO:0006793;GO:0006796;GO:0006915;GO:0007154;GO:0007165;GO:0008152;GO:0008219;GO:0009987;GO:0012501;GO:0016265;GO:0016310;GO:0019220;GO:0019222;GO:0019538;GO:0031323;GO:0033673;GO:0034960;GO:0040008;GO:0042325;GO:0043086;GO:0043170;GO:0043283;GO:0043412;GO:0043549;GO:0043687;GO:0044092;GO:0044237;GO:0044238;GO:0044260;GO:0044267;GO:0044419;GO:0045859;GO:0046777;GO:…	protein modification process;protein amino acid phosphorylation;negative regulation of protein kinase activity;phosphorus metabolic process;phosphate metabolic process;apoptosis;cell communication;signal transduction;metabolic process;cell death	hsa:5062	ko04010;ko04012;ko04810;ko04510;ko04660;ko04360;ko05211	MAPK signaling pathway;ErbB signaling pathway;Regulation of actin cytoskeleton;Focal adhesion;T cell receptor signaling pathway;Axon guidance;Renal cell carcinoma	K04410	0.999983	47.7991	0.997764	26.4959	2.05313e-05	47.67	130.93	0.990026	19.9678	0.0480445	13.71	69.555	0.996983	25.1905
1792	966	966		799	867	3149	7377	o100802_RD463HCLSa_37i	4264	3149	7377	o100802_RD463HCLSa_37i	4264	IPI00442038;IPI00853332;IPI00783293;IPI00289966	IPI00442038	IPI00442038	Pro-interleukin-16;Interleukin-16;Lymphocyte chemoattractant factor;cDNA FLJ16806 fis, clone TESTI4044704, highly similar to Interleukin-16;Pro-interleukin-16;Interleukin-16;Lymphocyte chemoattractant factor	IL16;IL16;IL16	interleukin 16 isoform 2;cDNA FLJ16759 fis, clone BRACE3046450, highly similar to Interleukin-16;132 kDa protein;Interleukin-16	A8MU65;Q6VVE6;Q9UME6;B3KY62;B5TY35;Q53HR8;Q6ZMQ7;Q6ZTT5;Q6ZVH3;Q14005;Q05BE6	ENST00000302987;ENST00000360547;ENST00000394652;ENST00000394653;ENST00000394656;ENST00000394656;ENST00000394660;ENST00000302987;ENST00000360547;ENST00000394652;ENST00000394653;ENST00000394656	PF00595;PF00595;PF00595	PDZ;PDZ;PDZ	PDZ domain (Also known as DHR or GLGF);PDZ domain (Also known as DHR or GLGF);PDZ domain (Also known as DHR or GLGF)	1I16;1X6D;1I16;1X6D;1I16;1X6D	GO:0005615;GO:0044421;GO:0005622;GO:0044464;GO:0005615;GO:0044421	extracellular space;extracellular region part;intracellular;cell part;extracellular space;extracellular region part	GO:0005102;GO:0005125;GO:0005488;GO:0005515;GO:0005102;GO:0005125;GO:0005488;GO:0005515;GO:0005102;GO:0005125;GO:0005488;GO:0005515	receptor binding;cytokine activity;binding;protein binding;receptor binding;cytokine activity;binding;protein binding;receptor binding;cytokine activity;binding;protein binding	GO:0002376;GO:0006935;GO:0006955;GO:0007610;GO:0007626;GO:0009605;GO:0040011;GO:0042221;GO:0042330;GO:0050896;GO:0002376;GO:0006928;GO:0006935;GO:0007610;GO:0007626;GO:0009605;GO:0009987;GO:0016477;GO:0030595;GO:0032101;GO:0032103;GO:0040011;GO:0040012;GO:0040017;GO:0042221;GO:0042330;GO:0048518;GO:0048520;GO:0048583;GO:0048584;GO:0048870;GO:0050789;GO:0050795;GO:0050896;GO:0050900;GO:0050920;GO:…	immune system process;chemotaxis;immune response;behavior;locomotory behavior;response to external stimulus;locomotion;response to chemical stimulus;taxis;response to stimulus;immune system process;cell motion;chemotaxis;behavior;locomotory behavior	hsa:3603;hsa:3603;hsa:3603				1	99.8463	1	99.8463	4.86632e-06	29.82	114.35	0.999999	60.4295	0.0185321	20.34	88.268	1	73.1048
2422	197	197		5023;5024;5025	5516;5517;5518	20148	47591	o101004_RD463HCLSb_i33	1961	20143	47577	o100702_RD463HSLCi_33	4399	IPI00455982;IPI00412406;IPI00878973	IPI00455982	IPI00455982	HMG domain-containing protein 4;HMG box-containing protein 4;High mobility group protein 2-like 1;Protein HMGBCG;High-mobility group protein 2-like 1;High-mobility group protein 2-like 1	HMGXB4;HMG2L1;HMGBCG;HMG2L1;RP3-510H16.2-004;HMG2L1;RP3-510H16.2-003	High mobility group protein 2-like 1;high-mobility group protein 2-like 1 isoform a;High-mobility group protein 2-like 1	Q9UGU5;B4DSN8;Q2M3X1;Q2T9L2;Q6P681;Q6PJ09;Q7Z641;B0QXZ9;Q6PJC1;B0QXZ8	ENST00000216106;ENST00000216106;ENST00000397384;ENST00000397385;ENST00000216106;ENST00000397384;ENST00000397385	PF00505	HMG_box	HMG (high mobility group) box		GO:0005634;GO:0005794;GO:0043226;GO:0043227;GO:0043229;GO:0043231;GO:0044424;GO:0044444;GO:0044464	nucleus;Golgi apparatus;organelle;membrane-bounded organelle;intracellular organelle;intracellular membrane-bounded organelle;intracellular part;cytoplasmic part;cell part	GO:0003676;GO:0003677;GO:0005488	nucleic acid binding;DNA binding;binding	GO:0006810;GO:0007034;GO:0007041;GO:0007154;GO:0007165;GO:0007166;GO:0008333;GO:0009966;GO:0009968;GO:0009987;GO:0010646;GO:0010648;GO:0016055;GO:0016192;GO:0016197;GO:0030111;GO:0030178;GO:0046907;GO:0048519;GO:0048523;GO:0050789;GO:0050794;GO:0051234;GO:0051649;GO:0065007	transport;vacuolar transport;lysosomal transport;cell communication;signal transduction;cell surface receptor linked signal transduction;endosome to lysosome transport;regulation of signal transduction;negative regulation of signal transduction	hsa:10042			K11298	1	27.8383	1	88.2678	0.0260418	21.45	88.268	1	76.318	0.123184	8.14	76.318	1	27.8383
2412	835	835	Phosphoserine	7701	8546	30424	70874	o100806_RD463HCLSa_49i	4371	30424	70874	o100806_RD463HCLSa_49i	4371	IPI00472782;IPI00454969	IPI00472782	IPI00472782	Putative uncharacterized protein PHF14;PHD finger protein 14	PHF14;PHF14;KIAA0783	PHD finger protein 14 isoform 1;PHD finger protein 14	A8MSQ1;B4DI82;O94880;A7MCZ3;B4DG57;B5MDI7	ENST00000303905;ENST00000303905;ENST00000403050	PF00628;PF00628	PHD;PHD	PHD-finger;PHD-finger				GO:0005488;GO:0005515;GO:0008270;GO:0043167;GO:0043169;GO:0046872;GO:0046914;GO:0005488;GO:0005515;GO:0008270;GO:0043167;GO:0043169;GO:0046872;GO:0046914	binding;protein binding;zinc ion binding;ion binding;cation binding;metal ion binding;transition metal ion binding;binding;protein binding;zinc ion binding;ion binding;cation binding;metal ion binding;transition metal ion binding			hsa:9678;hsa:9678				1	61.0115	1	26.9951	0.103773	9.72	45.991	1	61.0115	0.0276101	19.2	61.011
636	372	372		9222	10248	36521	85443	o100806_RD463HCLSa_49i	7096	36513	85430	o100702_RD463HSLCi_49	6424	IPI00477982;IPI00017305;IPI00641051;IPI00513863	IPI00477982	IPI00477982	Putative uncharacterized protein RPS6KA1;Ribosomal protein S6 kinase alpha-1;90 kDa ribosomal protein S6 kinase 1;p90-RSK 1;pp90RSK1;p90S6K;Ribosomal S6 kinase 1;MAP kinase-activated protein kinase 1a;Putative uncharacterized protein RPS6KA1;Ribosomal protein S6 kinase, 90kDa, polypeptide 1	RPS6KA1;RPS6KA1;RSK1;RPS6KA1;RPS6KA1;RP11-492M19.2-007	ribosomal protein S6 kinase, 90kDa, polypeptide 1 isoform b;Ribosomal protein S6 kinase alpha-1;Putative uncharacterized protein RPS6KA1;Ribosomal protein S6 kinase, 90kDa, polypeptide 1	A6NGG4;A8K9K7;Q15418;B2RDY8;B5MCJ0;Q5SVM6	ENST00000374162;ENST00000374162;ENST00000374168;ENST00000374162;ENST00000374168;ENST00000403732;ENST00000374162;ENST00000374166	PF00069;PF00433;PF00069;PF00433;PF00069;PF00433;PF00069;PF00433	Pkinase;Pkinase_C;Pkinase;Pkinase_C;Pkinase;Pkinase_C;Pkinase;Pkinase_C	Protein kinase domain;Protein kinase C terminal domain;Protein kinase domain;Protein kinase C terminal domain;Protein kinase domain;Protein kinase C terminal domain;Protein kinase domain;Protein kinase C terminal domain	2Z7Q;2Z7R;2Z7S	GO:0005634;GO:0005737;GO:0043226;GO:0043227;GO:0043229;GO:0043231;GO:0044424;GO:0044464;GO:0005654;GO:0005737;GO:0044422;GO:0044424;GO:0044428;GO:0044446;GO:0044464;GO:0005819;GO:0043226;GO:0043228;GO:0043229;GO:0043232;GO:0044422;GO:0044424;GO:0044430;GO:0044446;GO:0044464;GO:0005840;GO:0030529;GO:0032991;GO:0043226;GO:0043228;GO:0043229;GO:0043232;GO:0044424;GO:0044444;GO:0044464	nucleus;cytoplasm;organelle;membrane-bounded organelle;intracellular organelle;intracellular membrane-bounded organelle;intracellular part;cell part;nucleoplasm;cytoplasm;organelle part;intracellular part;nuclear part;intracellular organelle part	GO:0000166;GO:0000287;GO:0001882;GO:0001883;GO:0003824;GO:0004672;GO:0004674;GO:0005488;GO:0005524;GO:0016301;GO:0016740;GO:0016772;GO:0016773;GO:0017076;GO:0030554;GO:0032553;GO:0032555;GO:0032559;GO:0043167;GO:0043169;GO:0046872;GO:0000166;GO:0000287;GO:0001882;GO:0001883;GO:0003824;GO:0004672;GO:0004674;GO:0005488;GO:0005515;GO:0005524;GO:0016301;GO:0016740;GO:0016772;GO:0016773;GO:0017076;GO:…	nucleotide binding;magnesium ion binding;nucleoside binding;purine nucleoside binding;catalytic activity;protein kinase activity;protein serine/threonine kinase activity;binding;ATP binding;kinase activity;transferase activity	GO:0006464;GO:0006468;GO:0006793;GO:0006796;GO:0007154;GO:0007165;GO:0007242;GO:0007243;GO:0008152;GO:0009987;GO:0016310;GO:0019538;GO:0034960;GO:0043170;GO:0043283;GO:0043412;GO:0043687;GO:0044237;GO:0044238;GO:0044260;GO:0044267;GO:0050789;GO:0050794;GO:0065007;GO:0006464;GO:0006468;GO:0006793;GO:0006796;GO:0007154;GO:0007165;GO:0007242;GO:0007243;GO:0008152;GO:0009987;GO:0016310;GO:0019538;GO:…	protein modification process;protein amino acid phosphorylation;phosphorus metabolic process;phosphate metabolic process;cell communication;signal transduction;intracellular signaling cascade;protein kinase cascade;metabolic process;cellular process	hsa:6195;hsa:6195	ko04010;ko04150;ko04914;ko04720	MAPK signaling pathway;mTOR signaling pathway;Progesterone-mediated oocyte maturation;Long-term potentiation	K04373	0.945952	12.4312	0.890529	9.10492	4.20544e-09	35.16	95.176	0.945952	12.4312	4.37959e-07	37.11	86.906	0.738344	4.50628
2508	16	16	Phosphoserine	835;1813;6932	906;1989;7657	27427	63777	o100806_RD463HCLSa_39i	10912	27427	63777	o100806_RD463HCLSa_39i	10912	IPI00479997;IPI00643115;IPI00642012;IPI00744618	IPI00479997	IPI00479997	Stathmin;Phosphoprotein p19;Leukemia-associated phosphoprotein p18;Oncoprotein 18;pp17;Prosolin;Metablastin;Protein Pr22;Stathmin;Stathmin;Stathmin	STMN1;LAP18;OP18;STMN1;RP1-125I3.5-006;STMN1;RP1-125I3.5-004	Stathmin;Stathmin;Stathmin;Stathmin	P16949;B2R4E7;B5BU83;Q96CE4;A2A2D2;A2A2D0;Q59G27	ENST00000357865;ENST00000374291;ENST00000399727;ENST00000399728;ENST00000357865;ENST00000374292;ENST00000357865;ENST00000374291;ENST00000399727;ENST00000399728;ENST00000236291;ENST00000357865	PF00836;PF00836;PF00836;PF00836	Stathmin;Stathmin;Stathmin;Stathmin	Stathmin family;Stathmin family;Stathmin family;Stathmin family		GO:0005737;GO:0005874;GO:0044422;GO:0044424;GO:0044430;GO:0044446;GO:0044464	cytoplasm;microtubule;organelle part;intracellular part;cytoskeletal part;intracellular organelle part;cell part	GO:0004871;GO:0005488;GO:0005515;GO:0008092;GO:0015631;GO:0060089	signal transducer activity;binding;protein binding;cytoskeletal protein binding;tubulin binding;molecular transducer activity	GO:0000226;GO:0006996;GO:0007010;GO:0007017;GO:0007019;GO:0007051;GO:0007052;GO:0007154;GO:0007165;GO:0007242;GO:0007399;GO:0009987;GO:0016043;GO:0022402;GO:0022411;GO:0030154;GO:0031109;GO:0032502;GO:0032984;GO:0034621;GO:0034623;GO:0043241;GO:0043624;GO:0043933;GO:0048731;GO:0048856;GO:0048869;GO:0050789;GO:0050794;GO:0051261;GO:0065007;GO:0007154;GO:0007165;GO:0007242;GO:0009987;GO:0050789;GO:…	microtubule cytoskeleton organization;organelle organization;cytoskeleton organization;microtubule-based process;microtubule depolymerization;spindle organization;mitotic spindle organization;cell communication;signal transduction	hsa:3925	ko04010	MAPK signaling pathway	K04381	1	252.526	1	195.07	2.86206e-81	65.41	228.19	1	252.526	1.34021e-185	74.8	307.97	1	162.836
2508	25	25	Phosphoserine; by CDC2 and MAPK	835;1813;6932	906;1989;7657	3301	7812	o101004_RD463HCLSb_i33	5328	27427	63777	o100806_RD463HCLSa_39i	10912	IPI00479997;IPI00643115;IPI00642012;IPI00744618	IPI00479997	IPI00479997	Stathmin;Phosphoprotein p19;Leukemia-associated phosphoprotein p18;Oncoprotein 18;pp17;Prosolin;Metablastin;Protein Pr22;Stathmin;Stathmin;Stathmin	STMN1;LAP18;OP18;STMN1;RP1-125I3.5-006;STMN1;RP1-125I3.5-004	Stathmin;Stathmin;Stathmin;Stathmin	P16949;B2R4E7;B5BU83;Q96CE4;A2A2D2;A2A2D0;Q59G27	ENST00000357865;ENST00000374291;ENST00000399727;ENST00000399728;ENST00000357865;ENST00000374292;ENST00000357865;ENST00000374291;ENST00000399727;ENST00000399728;ENST00000236291;ENST00000357865	PF00836;PF00836;PF00836;PF00836	Stathmin;Stathmin;Stathmin;Stathmin	Stathmin family;Stathmin family;Stathmin family;Stathmin family		GO:0005737;GO:0005874;GO:0044422;GO:0044424;GO:0044430;GO:0044446;GO:0044464	cytoplasm;microtubule;organelle part;intracellular part;cytoskeletal part;intracellular organelle part;cell part	GO:0004871;GO:0005488;GO:0005515;GO:0008092;GO:0015631;GO:0060089	signal transducer activity;binding;protein binding;cytoskeletal protein binding;tubulin binding;molecular transducer activity	GO:0000226;GO:0006996;GO:0007010;GO:0007017;GO:0007019;GO:0007051;GO:0007052;GO:0007154;GO:0007165;GO:0007242;GO:0007399;GO:0009987;GO:0016043;GO:0022402;GO:0022411;GO:0030154;GO:0031109;GO:0032502;GO:0032984;GO:0034621;GO:0034623;GO:0043241;GO:0043624;GO:0043933;GO:0048731;GO:0048856;GO:0048869;GO:0050789;GO:0050794;GO:0051261;GO:0065007;GO:0007154;GO:0007165;GO:0007242;GO:0009987;GO:0050789;GO:…	microtubule cytoskeleton organization;organelle organization;cytoskeleton organization;microtubule-based process;microtubule depolymerization;spindle organization;mitotic spindle organization;cell communication;signal transduction	hsa:3925	ko04010	MAPK signaling pathway	K04381	1	146.297	1	118.78	2.86206e-81	65.41	228.19	1	108.925	1.34021e-185	74.8	307.97	1	146.297
2552	580	580	Phosphoserine	2825	3076	10980	25653	o100702_RD463HSLCi_43	9217	10980	25653	o100702_RD463HSLCi_43	9217	IPI00604620;IPI00827674;IPI00444262;IPI00183526	IPI00604620	IPI00604620	Nucleolin;Protein C23;cDNA FLJ10452 fis, clone NT2RP1000966, highly similar to NUCLEOLIN;Nucleolin, isoform CRA_c;cDNA FLJ45706 fis, clone FEBRA2028457, highly similar to Nucleolin;NCL protein	NCL;NCL;hCG_33980;NCL	Nucleolin;Nucleolin, isoform CRA_c;cDNA FLJ45706 fis, clone FEBRA2028457, highly similar to Nucleolin;NCL protein	P19338;B3KTP9;B3KM80;Q6ZS99;Q9BQ02;Q9UCF0	ENST00000322723;ENST00000356936;ENST00000322723;ENST00000356936;ENST00000322723;ENST00000392033;ENST00000322723;ENST00000322732	PF09538;PF00076;PF00076;PF00076;PF00076;PF09538	FYDLN_acid;RRM_1;RRM_1;RRM_1;RRM_1;FYDLN_acid	Protein of unknown function (FYDLN_acid);RNA recognition motif. (a.k.a. RRM, RBD, or RNP domain);RNA recognition motif. (a.k.a. RRM, RBD, or RNP domain);RNA recognition motif. (a.k.a. RRM, RBD, or RNP domain);RNA recognition motif. (a.k.a. RRM, RBD, or RNP domain);Protein of unknown function (FYDLN_acid)	2FC8;2FC9;2FC8;2FC9	GO:0005730;GO:0005938;GO:0030529;GO:0032991;GO:0043226;GO:0043228;GO:0043229;GO:0043232;GO:0044422;GO:0044424;GO:0044428;GO:0044444;GO:0044446;GO:0044464;GO:0005730;GO:0043226;GO:0043228;GO:0043229;GO:0043232;GO:0044422;GO:0044424;GO:0044428;GO:0044446;GO:0044464	nucleolus;cell cortex;ribonucleoprotein complex;macromolecular complex;organelle;non-membrane-bounded organelle;intracellular organelle;intracellular non-membrane-bounded organelle;organelle part;intracellular part;nuclear part;cytoplasmic part	GO:0000166;GO:0003676;GO:0003677;GO:0003723;GO:0005488;GO:0005515;GO:0008022;GO:0042162;GO:0043565;GO:0000166;GO:0003676;GO:0005488;GO:0000166;GO:0003676;GO:0005488;GO:0000166;GO:0003676;GO:0005488;GO:0005515	nucleotide binding;nucleic acid binding;DNA binding;RNA binding;binding;protein binding;protein C-terminus binding;telomeric DNA binding;sequence-specific DNA binding;nucleotide binding;nucleic acid binding;binding;nucleotide binding;nucleic acid binding	GO:0001525;GO:0010926;GO:0032502;GO:0048646;GO:0001525;GO:0010926;GO:0032502;GO:0048646	angiogenesis;anatomical structure formation;developmental process;anatomical structure formation involved in morphogenesis;angiogenesis;anatomical structure formation;developmental process;anatomical structure formation involved in morphogenesis	hsa:4691;hsa:4691			K11294	0.999944	42.5403	0.987987	23.9316	0.0145244	32.97	67.309
2566	104	104	Phosphoserine	5507;5508	6042;6043	22172	52152	o100702_RD463HSLCi_21	5912	22172	52152	o100702_RD463HSLCi_21	5912	IPI00641181	IPI00641181	IPI00641181	MARCKS-related protein;MARCKS-like protein 1;Macrophage myristoylated alanine-rich C kinase substrate	MARCKSL1;MLP;MRP	MARCKS-related protein	P49006	ENST00000329421	PF02063	MARCKS	MARCKS family		GO:0005886;GO:0016020;GO:0044464	plasma membrane;membrane;cell part	GO:0005488;GO:0005515;GO:0005516	binding;protein binding;calmodulin binding			hsa:65108				1	103.568	1	88.6084	0.0168655	31.62	111.83	1	74.5501	0.0525538	24.75	97.769	1	66.5798
187	344	344		8414;8972	9359;9971	35363	82632	o100702_RD463HSLCi_55	5775	35369	82655	o101004_RD463HCLSb_i55	3234	IPI00644290;IPI00005605;IPI00218503;IPI00218504;IPI00879739	IPI00644290	IPI00644290	NDRG family member 3;NDRG family member 3, isoform CRA_c;Protein NDRG3;Protein NDRG3;Protein NDRG3;Putative uncharacterized protein NDRG3	NDRG3;RP3-460J8.1-003;hCG_1785125;NDRG3;NDRG3;NDRG3;NDRG3	NDRG family member 3;Isoform 1 of Protein NDRG3;Isoform 2 of Protein NDRG3;Isoform 3 of Protein NDRG3;Putative uncharacterized protein NDRG3 (Fragment)	Q5TH30;Q9UGV2-1;Q9UGV2;Q9UGV2-2;A2A2S8;Q9UGV2-3;A6NP49	ENST00000373803;ENST00000349004;ENST00000359675;ENST00000373773;ENST00000373803;ENST00000349004;ENST00000359675;ENST00000373773;ENST00000373803;ENST00000349004;ENST00000359675;ENST00000373773;ENST00000373803;ENST00000373773;ENST00000373803	PF03096;PF03096;PF03096;PF03096;PF03096	Ndr;Ndr;Ndr;Ndr;Ndr	Ndr family;Ndr family;Ndr family;Ndr family;Ndr family		GO:0005737;GO:0044424;GO:0044464;GO:0005737;GO:0044424;GO:0044464;GO:0005737;GO:0044424;GO:0044464	cytoplasm;intracellular part;cell part;cytoplasm;intracellular part;cell part;cytoplasm;intracellular part;cell part			GO:0001558;GO:0007276;GO:0007283;GO:0009987;GO:0022414;GO:0030154;GO:0030308;GO:0032502;GO:0040008;GO:0045926;GO:0048232;GO:0048519;GO:0048523;GO:0048869;GO:0050789;GO:0050794;GO:0065007;GO:0001558;GO:0007276;GO:0007283;GO:0009987;GO:0022414;GO:0030154;GO:0030308;GO:0032502;GO:0040008;GO:0045926;GO:0048232;GO:0048519;GO:0048523;GO:0048869;GO:0050789;GO:0050794;GO:0065007;GO:0001558;GO:0007276;GO:…	regulation of cell growth;gamete generation;spermatogenesis;cellular process;reproductive process;cell differentiation;negative regulation of cell growth;developmental process;regulation of growth;negative regulation of growth;male gamete generation	hsa:57446;hsa:57446;hsa:57446				0.997445	26.795	0.996164	25.9536	1.15878e-74	92.59	221.7	0.911811	10.2523	9.71595e-27	97.75	159.38	0.959498	13.8531
2585	477	477		2414;7539	2635;8348	29710	69152	o100702_RD463HSLCi_43	8156	29712	69156	o101004_RD463HCLSb_i41	5489	IPI00644712;IPI00893062;IPI00889791;IPI00893179;IPI00888013;IPI00888181	IPI00644712	IPI00644712	ATP-dependent DNA helicase 2 subunit 1;ATP-dependent DNA helicase II 70 kDa subunit;Lupus Ku autoantigen protein p70;70 kDa subunit of Ku antigen;Thyroid-lupus autoantigen;CTC box-binding factor 75 kDa subunit;DNA repair protein XRCC6;X-ray repair complementing defective repair in Chinese hamster cells 6 (Ku autoantigen, 70kDa);X-ray repair complementing defective repair in Chinese hamster cells …	XRCC6;G22P1;XRCC6;CTA-216E10.7-005;XRCC6;CTA-216E10.7-002;hCG_2013151;XRCC6;CTA-216E10.7-004	ATP-dependent DNA helicase 2 subunit 1;X-ray repair complementing defective repair in Chinese hamster cells 6;X-ray repair complementing defective repair in Chinese hamster cells 6 (Ku autoantigen, 70kDa), isoform CRA_b;X-ray repair complementing defective	P12956;B2RDN9;B1AHC9;B4DE32;B4E356;Q6IC76;B1AHC8;B1AHC7	ENST00000359308;ENST00000360079;ENST00000405878;ENST00000360079;ENST00000405506;ENST00000360079;ENST00000402580;ENST00000360079;ENST00000402409	PF02735;PF03730;PF03731;PF02037;PF02735;PF03730;PF03731;PF02037;PF02735;PF03730;PF03731;PF02037;PF02735;PF03730;PF03731	Ku;Ku_C;Ku_N;SAP;Ku;Ku_C;Ku_N;SAP;Ku;Ku_C;Ku_N;SAP;Ku;Ku_C;Ku_N	Ku70/Ku80 beta-barrel domain;Ku70/Ku80 C-terminal arm;Ku70/Ku80 N-terminal alpha/beta domain;SAP domain;Ku70/Ku80 beta-barrel domain;Ku70/Ku80 C-terminal arm;Ku70/Ku80 N-terminal alpha/beta domain;SAP domain;Ku70/Ku80 beta-barrel domain;Ku70/Ku80 C-terminal arm;Ku70/Ku80 N-terminal alpha/beta domain;SAP domain;Ku70/Ku80 beta-barrel domain;Ku70/Ku80 C-terminal arm;Ku70/Ku80 N-terminal alpha/beta d…	1JEQ;1JEY;1JJR	GO:0000267;GO:0000782;GO:0000783;GO:0005624;GO:0005626;GO:0005667;GO:0005958;GO:0032991;GO:0032993;GO:0043234;GO:0044422;GO:0044424;GO:0044427;GO:0044428;GO:0044446;GO:0044451;GO:0044454;GO:0044464;GO:0070419;GO:0005958;GO:0032991;GO:0043234;GO:0044422;GO:0044424;GO:0044428;GO:0044446;GO:0044464;GO:0070419;GO:0005958;GO:0032991;GO:0043234;GO:0044422;GO:0044424;GO:0044428;GO:0044446;GO:0044464;GO:…	cell fraction;telomere cap complex;nuclear telomere cap complex;membrane fraction;insoluble fraction;transcription factor complex;DNA-dependent protein kinase-DNA ligase 4 complex;macromolecular complex;protein-DNA complex;protein complex;organelle part	GO:0003676;GO:0003677;GO:0003678;GO:0003690;GO:0003824;GO:0004003;GO:0004386;GO:0005488;GO:0005515;GO:0008022;GO:0008026;GO:0008094;GO:0010843;GO:0016462;GO:0016563;GO:0016787;GO:0016817;GO:0016818;GO:0016887;GO:0017111;GO:0030528;GO:0042623;GO:0043565;GO:0043566;GO:0070035;GO:0003676;GO:0003677;GO:0003678;GO:0003824;GO:0004003;GO:0004386;GO:0005488;GO:0008026;GO:0008094;GO:0016462;GO:0016787;GO:…	nucleic acid binding;DNA binding;DNA helicase activity;double-stranded DNA binding;catalytic activity;ATP-dependent DNA helicase activity;helicase activity;binding;protein binding;protein C-terminus binding;ATP-dependent helicase activity	GO:0000723;GO:0000726;GO:0006139;GO:0006259;GO:0006266;GO:0006281;GO:0006302;GO:0006303;GO:0006310;GO:0006355;GO:0006357;GO:0006807;GO:0006950;GO:0006974;GO:0006996;GO:0008152;GO:0009889;GO:0009891;GO:0009893;GO:0009987;GO:0010468;GO:0010551;GO:0010552;GO:0010556;GO:0010557;GO:0010604;GO:0010628;GO:0015074;GO:0016043;GO:0019047;GO:0019059;GO:0019219;GO:0019222;GO:0022414;GO:0022415;GO:0031323;GO:…	telomere maintenance;non-recombinational repair;nucleobase, nucleoside, nucleotide and nucleic acid metabolic process;DNA metabolic process;DNA ligation;DNA repair;double-strand break repair;double-strand break repair via nonhomologous end joining	hsa:2547;hsa:2547	ko03450	Non-homologous end-joining	K10884	0.998272	27.6164											0.716614	4.02906
1535	1010	1010		9248	10276	36596	85631	o100702_RD463HSLCi_39	9072	36596	85631	o100702_RD463HSLCi_39	9072	IPI00646361;IPI00900325;IPI00183294;IPI00900331;IPI00900318;IPI00465191	IPI00646361	IPI00646361	Nuclear pore complex protein Nup214;Nucleoporin Nup214;214 kDa nucleoporin;Protein CAN;Nuclear pore complex protein Nup214;Nucleoporin Nup214;214 kDa nucleoporin;Protein CAN;Nuclear pore complex protein Nup214;Nucleoporin Nup214;214 kDa nucleoporin;Protein CAN;Nuclear pore complex protein Nup214;Nucleoporin Nup214;214 kDa nucleoporin;Protein CAN;Nuclear pore complex protein Nup214;Nucleoporin Nup…	NUP214;CAIN;CAN;KIAA0023;NUP214;CAIN;CAN;KIAA0023;NUP214;CAIN;CAN;KIAA0023;NUP214;CAIN;CAN;KIAA0023;NUP214;CAIN;CAN;KIAA0023;NUP214;RP11-544A12.7-003	Isoform 5 of Nuclear pore complex protein Nup214;Isoform 3 of Nuclear pore complex protein Nup214;Isoform 1 of Nuclear pore complex protein Nup214;Isoform 4 of Nuclear pore complex protein Nup214;Isoform 2 of Nuclear pore complex protein Nup214;Putative un	P35658-5;P35658;P35658-3;P35658-1;P35658-4;P35658-2;B4DYZ6;B4DZN4;Q5JUP9;Q7Z3C4	ENST00000354226;ENST00000359428;ENST00000354226;ENST00000359428;ENST00000354226;ENST00000359428;ENST00000354226;ENST00000359428;ENST00000354226;ENST00000359428;ENST00000354226;ENST00000359428				2OIT;3FHC;3FMO;3FMP;2OIT;3FHC;3FMO;3FMP;2OIT;3FHC;3FMO;3FMP;2OIT;3FHC;3FMO;3FMP;2OIT;3FHC;3FMO;3FMP	GO:0005643;GO:0005829;GO:0032991;GO:0043234;GO:0044422;GO:0044424;GO:0044425;GO:0044428;GO:0044444;GO:0044446;GO:0044464;GO:0046930;GO:0005643;GO:0005829;GO:0032991;GO:0043234;GO:0044422;GO:0044424;GO:0044425;GO:0044428;GO:0044444;GO:0044446;GO:0044464;GO:0046930;GO:0005643;GO:0005829;GO:0032991;GO:0043234;GO:0044422;GO:0044424;GO:0044425;GO:0044428;GO:0044444;GO:0044446;GO:0044464;GO:0046930;GO:…	nuclear pore;cytosol;macromolecular complex;protein complex;organelle part;intracellular part;membrane part;nuclear part;cytoplasmic part;intracellular organelle part;cell part;pore complex;nuclear pore;cytosol;macromolecular complex;protein complex	GO:0005215;GO:0005488;GO:0005515;GO:0005215;GO:0005488;GO:0005515;GO:0005215;GO:0005488;GO:0005515;GO:0005215;GO:0005488;GO:0005515;GO:0005215;GO:0005488;GO:0005515;GO:0005215;GO:0005487	transporter activity;binding;protein binding;transporter activity;binding;protein binding;transporter activity;binding;protein binding;transporter activity;binding;protein binding;transporter activity;binding;protein binding;transporter activity	GO:0006605;GO:0006611;GO:0006810;GO:0006886;GO:0006913;GO:0009987;GO:0015031;GO:0015931;GO:0045184;GO:0046907;GO:0050657;GO:0050658;GO:0051028;GO:0051168;GO:0051169;GO:0051234;GO:0051236;GO:0051649;GO:0055085;GO:0065002;GO:0006605;GO:0006611;GO:0006810;GO:0006886;GO:0006913;GO:0009987;GO:0015031;GO:0015931;GO:0045184;GO:0046907;GO:0050657;GO:0050658;GO:0051028;GO:0051168;GO:0051169;GO:0051234;GO:…	protein targeting;protein export from nucleus;transport;intracellular protein transport;nucleocytoplasmic transport;cellular process;protein transport;nucleobase, nucleoside, nucleotide and nucleic acid transport;establishment of protein localization	hsa:8021;hsa:8021;hsa:8021;hsa:8021;hsa:8021				0.816673	6.48871	0.737114	4.47808	1.84401e-07	58.56	105.65	0.40345	1.31173	3.01876e-06	56.94	95.966	0.783356	5.5891
1553	496	496		8457	9406	33295	77655	o101004_RD463HCLSb_i55	1361	33295	77655	o101004_RD463HCLSb_i55	1361	IPI00647185;IPI00186194;IPI00909334;IPI00910412	IPI00647185	IPI00647185	Centrosomal protein 170kDa;Centrosomal protein of 170 kDa;KARP-1-binding protein;KARP1-binding protein;cDNA FLJ53512, highly similar to Homo sapiens centrosomal protein 170 kDa (CEP170), transcript variant alpha, mRNA;cDNA FLJ60844, highly similar to Homo sapiens centrosomal protein 170 kDa (CEP170), transcript variant alpha, mRNA	CEP170;RP11-411G13.1-004;CEP170;FAM68A;KAB;KIAA0470	Centrosomal protein 170kDa;Isoform 1 of Centrosomal protein of 170 kDa;cDNA FLJ53512, highly similar to Homo sapiens centrosomal protein 170 kDa (CEP170), transcript variant alpha, mRNA (Fragment);cDNA FLJ60844, highly similar to Homo sapiens centrosomal p	B1ARM6;Q5SW79-1;Q5SW79;B4DL23;B4DS35	ENST00000321628;ENST00000272037;ENST00000321628;ENST00000366542;ENST00000272037;ENST00000321628;ENST00000366542	PF00498;PF00498	FHA;FHA	FHA domain;FHA domain		GO:0005814;GO:0005874;GO:0043226;GO:0043228;GO:0043229;GO:0043232;GO:0044422;GO:0044424;GO:0044430;GO:0044444;GO:0044446;GO:0044450;GO:0044464	centriole;microtubule;organelle;non-membrane-bounded organelle;intracellular organelle;intracellular non-membrane-bounded organelle;organelle part;intracellular part;cytoskeletal part;cytoplasmic part;intracellular organelle part					hsa:9859				0.682473	4.32327											0.682473	4.32327
1721	192	192		7802	8665	30803	71827	o100802_RD463HCLSa_49i	7444	30803	71827	o100802_RD463HCLSa_49i	7444	IPI00647655;IPI00220317	IPI00647655	IPI00647655	DNA polymerase;DNA polymerase alpha catalytic subunit	POLA1;POLA1;POLA	DNA polymerase;DNA polymerase alpha catalytic subunit	A6NMQ1;P09884	ENST00000379068;ENST00000379059;ENST00000379068	PF00136;PF03104;PF08996;PF00136;PF03104;PF08996	DNA_pol_B;DNA_pol_B_exo;zf-DNA_Pol;DNA_pol_B;DNA_pol_B_exo;zf-DNA_Pol	DNA polymerase family B;DNA polymerase family B, exonuclease domain;DNA Polymerase alpha zinc finger;DNA polymerase family B;DNA polymerase family B, exonuclease domain;DNA Polymerase alpha zinc finger	1K0P;1K18;1N5G	GO:0005634;GO:0005737;GO:0043226;GO:0043227;GO:0043229;GO:0043231;GO:0044424;GO:0044464;GO:0005635;GO:0005654;GO:0005658;GO:0005730;GO:0005737;GO:0016363;GO:0031967;GO:0031975;GO:0032991;GO:0043226;GO:0043228;GO:0043229;GO:0043232;GO:0043234;GO:0044422;GO:0044424;GO:0044427;GO:0044428;GO:0044446;GO:0044454;GO:0044464	nucleus;cytoplasm;organelle;membrane-bounded organelle;intracellular organelle;intracellular membrane-bounded organelle;intracellular part;cell part;nuclear envelope;nucleoplasm;alpha DNA polymerase:primase complex;nucleolus;cytoplasm;nuclear matrix	GO:0000166;GO:0001882;GO:0003676;GO:0003677;GO:0003824;GO:0003887;GO:0005488;GO:0016740;GO:0016772;GO:0016779;GO:0034061;GO:0000166;GO:0001882;GO:0003676;GO:0003677;GO:0003682;GO:0003824;GO:0003887;GO:0005488;GO:0008270;GO:0016740;GO:0016772;GO:0016779;GO:0034061;GO:0043167;GO:0043169;GO:0046872;GO:0046914	nucleotide binding;nucleoside binding;nucleic acid binding;DNA binding;catalytic activity;DNA-directed DNA polymerase activity;binding;transferase activity;transferase activity, transferring phosphorus-containing groups;nucleotidyltransferase activity	GO:0006139;GO:0006259;GO:0006260;GO:0006807;GO:0008152;GO:0009058;GO:0009059;GO:0009987;GO:0034645;GO:0034960;GO:0034961;GO:0043170;GO:0043283;GO:0043284;GO:0044237;GO:0044238;GO:0044249;GO:0044260;GO:0000084;GO:0000726;GO:0000731;GO:0006139;GO:0006259;GO:0006260;GO:0006270;GO:0006271;GO:0006272;GO:0006273;GO:0006281;GO:0006302;GO:0006303;GO:0006807;GO:0006950;GO:0006974;GO:0008152;GO:0008283;GO:…	nucleobase, nucleoside, nucleotide and nucleic acid metabolic process;DNA metabolic process;DNA replication;nitrogen compound metabolic process;metabolic process;biosynthetic process;macromolecule biosynthetic process;cellular process	hsa:5422	ko03030	DNA replication	K02320	0.999867	39.6369	0.999867	39.6369	0.0374527	9.47	59.424	0.996159	27.5336	0.123686	6.5	40.592
2610	211	211	Phosphoserine	94	100	403	929	o100802_RD463HCLSa_53i	4979	407	937	o101004_RD463HCLSb_i53	3045	IPI00736251	IPI00736251	IPI00736251	Protein phosphatase 1H	PPM1H;ARHCL1;KIAA1157	Protein phosphatase 1H	Q9ULR3;B1Q2A9;B2RXG4	ENST00000228705	PF00481	PP2C	Protein phosphatase 2C				GO:0003824;GO:0004721;GO:0016787;GO:0016788;GO:0016791;GO:0042578	catalytic activity;phosphoprotein phosphatase activity;hydrolase activity;hydrolase activity, acting on ester bonds;phosphatase activity;phosphoric ester hydrolase activity			hsa:57460				1	91.6539	1	91.6539	8.36448e-15	33.66	109.65	0.999927	41.7581	0.000191276	24.71	67.309	1	83.9795
2617	2155	2155	Phosphoserine	8828	9817	34847	81375	o100702_RD463HSLCi_43	7913	34855	81401	o101004_RD463HCLSb_i43	5333	IPI00742682	IPI00742682	IPI00742682	Nucleoprotein TPR	TPR	Nucleoprotein TPR	P12270;A0PJC9;Q15624;Q504U6;Q58F23;Q99968;Q9UE33	ENST00000367478	PF07926	TPR_MLP1_2	TPR/MLP1/MLP2-like protein		GO:0005643;GO:0005654;GO:0005737;GO:0016020;GO:0031090;GO:0031965;GO:0032991;GO:0043234;GO:0044422;GO:0044424;GO:0044425;GO:0044428;GO:0044446;GO:0044464;GO:0046930	nuclear pore;nucleoplasm;cytoplasm;membrane;organelle membrane;nuclear membrane;macromolecular complex;protein complex;organelle part;intracellular part;membrane part;nuclear part;intracellular organelle part;cell part;pore complex	GO:0000166;GO:0001882;GO:0001883;GO:0003824;GO:0004812;GO:0004828;GO:0005488;GO:0005515;GO:0005524;GO:0016874;GO:0016875;GO:0016876;GO:0017076;GO:0030554;GO:0032553;GO:0032555;GO:0032559	nucleotide binding;nucleoside binding;purine nucleoside binding;catalytic activity;aminoacyl-tRNA ligase activity;serine-tRNA ligase activity;binding;protein binding;ATP binding;ligase activity;ligase activity, forming carbon-oxygen bonds	GO:0000075;GO:0006082;GO:0006139;GO:0006399;GO:0006418;GO:0006434;GO:0006519;GO:0006520;GO:0006605;GO:0006606;GO:0006807;GO:0006810;GO:0006886;GO:0006913;GO:0007088;GO:0007093;GO:0007094;GO:0007346;GO:0008152;GO:0009308;GO:0009987;GO:0010564;GO:0010639;GO:0010948;GO:0015031;GO:0015931;GO:0016070;GO:0017038;GO:0019752;GO:0030071;GO:0031577;GO:0033043;GO:0034660;GO:0034960;GO:0042180;GO:0043038;GO:…	cell cycle checkpoint;organic acid metabolic process;nucleobase, nucleoside, nucleotide and nucleic acid metabolic process;tRNA metabolic process;tRNA aminoacylation for protein translation;seryl-tRNA aminoacylation	hsa:7175	ko04011;ko05200;ko05216	MAPK signaling pathway - yeast;Pathways in cancer;Thyroid cancer	K09291	1	81.3507	1	70.26	4.0944e-20	40.35	147.94	1	69.4009	4.69352e-37	51.71	175.05	1	63.9239
1343;2641	138;119	119	Phosphoserine	7037;7038	7770;7771;7772;7773	27756	64529	o101004_RD463HCLSb_i45	4648	27756	64529	o101004_RD463HCLSb_i45	4648	IPI00152151;IPI00446175;IPI00792682;IPI00749302;IPI00794590	IPI00152151;IPI00749302	IPI00749302	Protein FAM122B;Protein FAM122B;Protein FAM122B;Protein FAM122B;Protein FAM122B	FAM122B;FAM122B;FAM122B;FAM122B;FAM122B	Isoform 3 of Protein FAM122B;Isoform 4 of Protein FAM122B;Isoform 1 of Protein FAM122B;Isoform 2 of Protein FAM122B;Isoform 5 of Protein FAM122B	Q7Z309-3;Q7Z309;Q7Z309-4;Q7Z309-1;Q7Z309-2;A8K902;Q7Z309-5;B4DN12	ENST00000298090;ENST00000343004;ENST00000370790;ENST00000394274;ENST00000298090;ENST00000343004;ENST00000370790;ENST00000394274;ENST00000298090;ENST00000343004;ENST00000370790;ENST00000394274;ENST00000298090;ENST00000343004;ENST00000370790;ENST00000394274;ENST00000298090;ENST00000343004;ENST00000370790;ENST00000394274					GO:0005634;GO:0043226;GO:0043227;GO:0043229;GO:0043231;GO:0044424;GO:0044464;GO:0005634;GO:0043226;GO:0043227;GO:0043229;GO:0043231;GO:0044424;GO:0044464;GO:0005634;GO:0043226;GO:0043227;GO:0043229;GO:0043231;GO:0044424;GO:0044464;GO:0005634;GO:0043226;GO:0043227;GO:0043229;GO:0043231;GO:0044424;GO:0044464;GO:0005634;GO:0043226;GO:0043227;GO:0043229;GO:0043231;GO:0044424;GO:0044464	nucleus;organelle;membrane-bounded organelle;intracellular organelle;intracellular membrane-bounded organelle;intracellular part;cell part;nucleus;organelle;membrane-bounded organelle;intracellular organelle;intracellular membrane-bounded organelle					hsa:159090;hsa:159090;hsa:159090;hsa:159090;hsa:159090				0.999956	43.6095	0.999846	38.115	2.13706e-24	26.24	150.7	0.999745	35.929	1.08524e-17	31.39	131.11	0.999956	43.6095
1343;2641	140;121	121	Phosphothreonine	7037;7038	7770;7771;7772;7773	27754	64526	o100702_RD463HSLCi_45	6920	27756	64529	o101004_RD463HCLSb_i45	4648	IPI00152151;IPI00446175;IPI00792682;IPI00749302;IPI00794590	IPI00152151;IPI00749302	IPI00749302	Protein FAM122B;Protein FAM122B;Protein FAM122B;Protein FAM122B;Protein FAM122B	FAM122B;FAM122B;FAM122B;FAM122B;FAM122B	Isoform 3 of Protein FAM122B;Isoform 4 of Protein FAM122B;Isoform 1 of Protein FAM122B;Isoform 2 of Protein FAM122B;Isoform 5 of Protein FAM122B	Q7Z309-3;Q7Z309;Q7Z309-4;Q7Z309-1;Q7Z309-2;A8K902;Q7Z309-5;B4DN12	ENST00000298090;ENST00000343004;ENST00000370790;ENST00000394274;ENST00000298090;ENST00000343004;ENST00000370790;ENST00000394274;ENST00000298090;ENST00000343004;ENST00000370790;ENST00000394274;ENST00000298090;ENST00000343004;ENST00000370790;ENST00000394274;ENST00000298090;ENST00000343004;ENST00000370790;ENST00000394274					GO:0005634;GO:0043226;GO:0043227;GO:0043229;GO:0043231;GO:0044424;GO:0044464;GO:0005634;GO:0043226;GO:0043227;GO:0043229;GO:0043231;GO:0044424;GO:0044464;GO:0005634;GO:0043226;GO:0043227;GO:0043229;GO:0043231;GO:0044424;GO:0044464;GO:0005634;GO:0043226;GO:0043227;GO:0043229;GO:0043231;GO:0044424;GO:0044464;GO:0005634;GO:0043226;GO:0043227;GO:0043229;GO:0043231;GO:0044424;GO:0044464	nucleus;organelle;membrane-bounded organelle;intracellular organelle;intracellular membrane-bounded organelle;intracellular part;cell part;nucleus;organelle;membrane-bounded organelle;intracellular organelle;intracellular membrane-bounded organelle					hsa:159090;hsa:159090;hsa:159090;hsa:159090;hsa:159090				0.886785	8.93947	0.00115142	-29.3385	2.13706e-24	26.24	150.7	0.000255264	-35.929	1.08524e-17	31.39	131.11	0.5	0
2647	2032	2032	Phosphoserine	8416	9361;9362	33142	77325	o100702_RD463HSLCi_41	4625	33141	77322	o100702_RD463HSLCi_37	4232	IPI00782992	IPI00782992	IPI00782992	Serine/arginine repetitive matrix protein 2;Serine/arginine-rich splicing factor-related nuclear matrix protein of 300 kDa;Splicing coactivator subunit SRm300;300 kDa nuclear matrix antigen	SRRM2;KIAA0324;SRL300;SRM300;HSPC075	Isoform 1 of Serine/arginine repetitive matrix protein 2	Q9UQ35-1;Q9UQ35;A0AUK8;O60382	ENST00000301740;ENST00000382301;ENST00000396975	PF08312	cwf21	cwf21		GO:0005681;GO:0016604;GO:0016607;GO:0030529;GO:0032991;GO:0044422;GO:0044424;GO:0044428;GO:0044446;GO:0044451;GO:0044464	spliceosomal complex;nuclear body;nuclear speck;ribonucleoprotein complex;macromolecular complex;organelle part;intracellular part;nuclear part;intracellular organelle part;nucleoplasm part;cell part	GO:0003676;GO:0003723;GO:0005488;GO:0005515	nucleic acid binding;RNA binding;binding;protein binding	GO:0006139;GO:0006396;GO:0006397;GO:0006807;GO:0008152;GO:0008380;GO:0009987;GO:0016070;GO:0016071;GO:0034960;GO:0043170;GO:0043283;GO:0044237;GO:0044238;GO:0044260	nucleobase, nucleoside, nucleotide and nucleic acid metabolic process;RNA processing;mRNA processing;nitrogen compound metabolic process;metabolic process;RNA splicing;cellular process;RNA metabolic process;mRNA metabolic process	hsa:23524				0.999909	40.4222											0.97435	15.7963
2665	461	461	Phosphoserine	6936;7275	7661;8043	27438	63804	o100806_RD463HCLSa_45i	8346	27437	63803	o100802_RD463HCLSa_45i	7220	IPI00784739;IPI00878852;IPI00879168	IPI00784739	IPI00784739	Uncharacterized protein C14orf43;C14orf43 protein	C14orf43;C14orf117;C14orf43	Uncharacterized protein C14orf43;C14orf43 protein (Fragment);49 kDa protein	Q6PJG2;A0PJD3	ENST00000286523;ENST00000394071;ENST00000286523;ENST00000394071	PF01448;PF00249;PF01448;PF00249	ELM2;Myb_DNA-binding;ELM2;Myb_DNA-binding	ELM2 domain;Myb-like DNA-binding domain;ELM2 domain;Myb-like DNA-binding domain		GO:0005634;GO:0043226;GO:0043227;GO:0043229;GO:0043231;GO:0044424;GO:0044464	nucleus;organelle;membrane-bounded organelle;intracellular organelle;intracellular membrane-bounded organelle;intracellular part;cell part	GO:0003676;GO:0003677;GO:0005488;GO:0003676;GO:0003677;GO:0005488	nucleic acid binding;DNA binding;binding;nucleic acid binding;DNA binding;binding	GO:0006139;GO:0006350;GO:0006355;GO:0006807;GO:0008152;GO:0009058;GO:0009059;GO:0009889;GO:0009987;GO:0010468;GO:0010556;GO:0019219;GO:0019222;GO:0031323;GO:0031326;GO:0034645;GO:0034960;GO:0034961;GO:0043170;GO:0043283;GO:0043284;GO:0044237;GO:0044238;GO:0044249;GO:0044260;GO:0045449;GO:0050789;GO:0050794;GO:0051171;GO:0051252;GO:0060255;GO:0065007;GO:0080090	nucleobase, nucleoside, nucleotide and nucleic acid metabolic process;transcription;regulation of transcription, DNA-dependent;nitrogen compound metabolic process;metabolic process;biosynthetic process;macromolecule biosynthetic process	hsa:91748				1	180.722	1	179.246	2.12357e-98	90.25	243.15	1	180.722	2.86206e-81	79.98	228.19	1	69.6375
2606	320	320		5559;6849;7877	6100;7569;8749	22395	52627	o100802_RD463HCLSa_43i	10287	22393	52620	o100702_RD463HSLCi_41	10755	IPI00790521;IPI00657797	IPI00790521	IPI00790521	Septin-1;LARP;Serologically defined breast cancer antigen NY-BR-24;Peanut-like protein 3	SEPT1;DIFF6;PNUTL3	Septin-1;Septin-1	Q8WYJ6;Q658T1	ENST00000321367;ENST00000395109	PF00735	Septin	Septin		GO:0031105;GO:0032991;GO:0043234;GO:0044422;GO:0044424;GO:0044430;GO:0044444;GO:0044446;GO:0044448;GO:0044464	septin complex;macromolecular complex;protein complex;organelle part;intracellular part;cytoskeletal part;cytoplasmic part;intracellular organelle part;cell cortex part;cell part	GO:0000166;GO:0005488;GO:0005515;GO:0005525;GO:0017076;GO:0019001;GO:0032553;GO:0032555;GO:0032561	nucleotide binding;binding;protein binding;GTP binding;purine nucleotide binding;guanyl nucleotide binding;ribonucleotide binding;purine ribonucleotide binding;guanyl ribonucleotide binding	GO:0007049;GO:0009987;GO:0051301	cell cycle;cellular process;cell division	hsa:1731				0.98313	18.2175	0.98313	18.2175	2.76284e-14	34.8	105.09	0.139036	-6.47655	0.000917487	35.42	63.599	0.892722	9.27805
675	37	37		4194;8374	4621;9305	16990	40251	o100702_RD463HSLCi_43	6122	16991	40253	o100806_RD463HCLSa_41i	6096	IPI00794461;IPI00646240;IPI00419833;IPI00816252;IPI00329665;IPI00303133;IPI00018534;IPI00020101;IPI00152906;IPI00477495;IPI00554798;IPI00815755	IPI00794461	IPI00794461	Histone H2B type 1-N;H2B.d;H2B/d;Histone H2B;Histone H2B type 1-K;HIRA-interacting protein 1;Histone H2B type 2-F;Histone H2B type 1-H;H2B.j;H2B/j;Histone H2B type 1-L;H2B.c;H2B/c;Histone H2B type 1-C/E/F/G/I;H2B.a/g/h/k/l;H2B.1 A;H2B/g;H2B/h;H2B/k;H2B/l;Histone H2B type 1-D;H2B.b;H2B/b;H2B.1 B;HIRA-interacting protein 2;Histone H2B type F-S;Histone H2B type 1-M;HIST1H2BC protein	HIST1H2BN;H2BFD;HIST1H2BK;H2BFT;HIRIP1;HIST2H2BF;HIST1H2BH;H2BFJ;HIST1H2BL;H2BFC;HIST1H2BC;H2BFL;HIST1H2BE;H2BFH;HIST1H2BF;H2BFG;HIST1H2BG;H2BFA;HIST1H2BI;H2BFK;HIST1H2BD;H2BFB;HIRIP2;H2BFS;HIST1H2BM;H2BFE;HIST1H2BC	Histone H2B type 1-N;cDNA FLJ56787, highly similar to Histone H2B type 2-F;cDNA FLJ56780, highly similar to Histone H2B type 2-F;Histone H2B;Histone H2B type 2-F;Histone H2B type 1-H;Histone H2B type 1-L;histone cluster 1, H2bg;Histone H2B type 1-D;Histone	Q99877;A8K9J7;B2R5L4;B4DR52;Q3KP43;O60814;A8K7P7;B4DLA9;A0AVI3;Q5QNW6;A8K0U9;Q93079;B2R541;Q99880;B2R5A3;P62807;B2R4S9;P58876;P57053;Q99879;Q0D2M2	ENST00000369385;ENST00000406034;ENST00000369167;ENST00000356950;ENST00000396891;ENST00000369167;ENST00000356350;ENST00000377401;ENST00000314332;ENST00000339812;ENST00000356530;ENST00000356950;ENST00000359985;ENST00000377733;ENST00000396891;ENST00000396984;ENST00000289316;ENST00000377777;ENST00000356950;ENST00000396891;ENST00000359465;ENST00000314332;ENST00000339812;ENST00000356530;ENST00000359985…	PF00125;PF00125;PF00125;PF00125;PF00125;PF00125;PF00125;PF00125;PF00125;PF00125;PF00125	Histone;Histone;Histone;Histone;Histone;Histone;Histone;Histone;Histone;Histone;Histone	Core histone H2A/H2B/H3/H4;Core histone H2A/H2B/H3/H4;Core histone H2A/H2B/H3/H4;Core histone H2A/H2B/H3/H4;Core histone H2A/H2B/H3/H4;Core histone H2A/H2B/H3/H4;Core histone H2A/H2B/H3/H4;Core histone H2A/H2B/H3/H4;Core histone H2A/H2B/H3/H4;Core histone H2A/H2B/H3/H4;Core histone H2A/H2B/H3/H4	2CV5	GO:0000786;GO:0005634;GO:0032991;GO:0032993;GO:0043226;GO:0043227;GO:0043229;GO:0043231;GO:0044422;GO:0044424;GO:0044427;GO:0044446;GO:0044464;GO:0000786;GO:0005634;GO:0032991;GO:0032993;GO:0043226;GO:0043227;GO:0043229;GO:0043231;GO:0044422;GO:0044424;GO:0044427;GO:0044446;GO:0044464;GO:0000786;GO:0005634;GO:0032991;GO:0032993;GO:0043226;GO:0043227;GO:0043229;GO:0043231;GO:0044422;GO:0044424;GO:…	nucleosome;nucleus;macromolecular complex;protein-DNA complex;organelle;membrane-bounded organelle;intracellular organelle;intracellular membrane-bounded organelle;organelle part;intracellular part;chromosomal part;intracellular organelle part;cell part	GO:0003676;GO:0003677;GO:0005488;GO:0003676;GO:0003677;GO:0005488;GO:0003676;GO:0003677;GO:0005488;GO:0003676;GO:0003677;GO:0005488;GO:0003676;GO:0003677;GO:0005488;GO:0003676;GO:0003677;GO:0005488;GO:0003676;GO:0003677;GO:0005488;GO:0005515;GO:0003676;GO:0003677;GO:0005488;GO:0003676;GO:0003677;GO:0005488;GO:0003676;GO:0003677;GO:0005488;GO:0003676;GO:0003677;GO:0005488	nucleic acid binding;DNA binding;binding;nucleic acid binding;DNA binding;binding;nucleic acid binding;DNA binding;binding;nucleic acid binding;DNA binding;binding;nucleic acid binding;DNA binding;binding;nucleic acid binding;DNA binding;binding	GO:0006325;GO:0006334;GO:0006996;GO:0009987;GO:0010926;GO:0016043;GO:0022607;GO:0034621;GO:0034622;GO:0034728;GO:0043933;GO:0051276;GO:0065003;GO:0065004;GO:0006325;GO:0006334;GO:0006996;GO:0009987;GO:0010926;GO:0016043;GO:0022607;GO:0034621;GO:0034622;GO:0034728;GO:0043933;GO:0051276;GO:0065003;GO:0065004;GO:0006325;GO:0006334;GO:0006950;GO:0006952;GO:0006996;GO:0009607;GO:0009617;GO:0009987;GO:…	chromatin organization;nucleosome assembly;organelle organization;cellular process;anatomical structure formation;cellular component organization;cellular component assembly;cellular macromolecular complex subunit organization	hsa:8341;hsa:85236;hsa:440689;hsa:8345;hsa:8340;hsa:8339;hsa:8343;hsa:8344;hsa:8346;hsa:8347;hsa:3017;hsa:8342	ko05322	Systemic lupus erythematosus	K11252	1	68.6386						0.998822	29.2834	2.9219e-46	49	192.41	0.999168	30.8165
277	286	286		8557	9519	33703	78657	o100702_RD463HSLCi_51	3756	33706	78663	o101004_RD463HCLSb_i51	1684	IPI00796513;IPI00007757;IPI00218656;IPI00450516;IPI00386999	IPI00796513	IPI00796513	cDNA FLJ55795, highly similar to Zinc finger protein Helios;Zinc finger protein, subfamily 1A, 2 (Helios), isoform CRA_d;Zinc finger protein Helios;Ikaros family zinc finger protein 2;Zinc finger protein Helios;Ikaros family zinc finger protein 2;Helios del(Ex5)v isoform;Helios 3	ZNFN1A2;hCG_14830;IKZF2;HELIOS;ZNFN1A2;IKZF2;HELIOS;ZNFN1A2;ZNFN1A2	cDNA FLJ55795, highly similar to Zinc finger protein Helios;Isoform 1 of Zinc finger protein Helios;Isoform 2 of Zinc finger protein Helios;Helios del(Ex5)v isoform;Helios 3	B4DWF2;Q9UKS7-1;Q9UKS7;Q53SU9;Q6PQC8;Q9UKS7-2;Q53QP1;Q53RV5;Q53YJ5;Q6PQC7;Q6PQC6;Q96LD7	ENST00000342002;ENST00000342002;ENST00000374319;ENST00000342002;ENST00000374319;ENST00000264190;ENST00000342002;ENST00000264190;ENST00000342002;ENST00000374319	PF00096;PF00096;PF00096;PF00096	zf-C2H2;zf-C2H2;zf-C2H2;zf-C2H2	Zinc finger, C2H2 type;Zinc finger, C2H2 type;Zinc finger, C2H2 type;Zinc finger, C2H2 type		GO:0005622;GO:0044464;GO:0005634;GO:0043226;GO:0043227;GO:0043229;GO:0043231;GO:0044424;GO:0044464;GO:0005634;GO:0043226;GO:0043227;GO:0043229;GO:0043231;GO:0044424;GO:0044464;GO:0005622;GO:0044464;GO:0005622;GO:0044464	intracellular;cell part;nucleus;organelle;membrane-bounded organelle;intracellular organelle;intracellular membrane-bounded organelle;intracellular part;cell part;nucleus;organelle;membrane-bounded organelle;intracellular organelle	GO:0003676;GO:0005488;GO:0008270;GO:0043167;GO:0043169;GO:0046872;GO:0046914;GO:0003676;GO:0003677;GO:0005488;GO:0008270;GO:0043167;GO:0043169;GO:0046872;GO:0046914;GO:0003676;GO:0003677;GO:0005488;GO:0008270;GO:0043167;GO:0043169;GO:0046872;GO:0046914;GO:0003676;GO:0005488;GO:0008270;GO:0043167;GO:0043169;GO:0046872;GO:0046914;GO:0005488;GO:0008270;GO:0043167;GO:0043169;GO:0046872;GO:0046914	nucleic acid binding;binding;zinc ion binding;ion binding;cation binding;metal ion binding;transition metal ion binding;nucleic acid binding;DNA binding;binding;zinc ion binding;ion binding;cation binding;metal ion binding;transition metal ion binding	GO:0006139;GO:0006350;GO:0006355;GO:0006807;GO:0008152;GO:0009058;GO:0009059;GO:0009889;GO:0009987;GO:0010468;GO:0010556;GO:0019219;GO:0019222;GO:0031323;GO:0031326;GO:0034645;GO:0034960;GO:0034961;GO:0043170;GO:0043283;GO:0043284;GO:0044237;GO:0044238;GO:0044249;GO:0044260;GO:0045449;GO:0050789;GO:0050794;GO:0051171;GO:0051252;GO:0060255;GO:0065007;GO:0080090;GO:0006139;GO:0006350;GO:0006355;GO:…	nucleobase, nucleoside, nucleotide and nucleic acid metabolic process;transcription;regulation of transcription, DNA-dependent;nitrogen compound metabolic process;metabolic process;biosynthetic process;macromolecule biosynthetic process	hsa:22807;hsa:22807			K09220	0.962234	15.1228	0.454718	1.53918	0.308873	24.84	41.668	0.247805	-3.08655	0.383066	14.78	37.064	0.950203	14.1854
404	458	458		4558;7085	5010;7827	27982	65122	o100806_RD463HCLSa_51i	4989	18382	43599	o100806_RD463HCLSa_49i	6121	IPI00844237;IPI00893641;IPI00893120;IPI00010700;IPI00894143;IPI00642817;IPI00854786;IPI00084746;IPI00885161	IPI00844237	IPI00844237	cDNA FLJ56810, highly similar to Large proline-rich protein BAT2;HLA-B associated transcript 2;Large proline-rich protein BAT2;HLA-B-associated transcript 2;Large proline-rich protein BAT2;HLA-B-associated transcript 2;Large proline-rich protein BAT2;HLA-B-associated transcript 2;Putative uncharacterized protein BAT2;Large proline-rich protein BAT2;HLA-B-associated transcript 2;Large proline-rich…	BAT2;DAMA-236L13.4-001;BAT2;G2;BAT2;G2;BAT2;G2;BAT2;BAT2;G2;BAT2;G2	HLA-B associated transcript-2;HLA-B associated transcript 2;HLA-B associated transcript 2;Isoform 1 of Large proline-rich protein BAT2;229 kDa protein;Isoform 3 of Large proline-rich protein BAT2;Putative uncharacterized protein BAT2;Isoform 2 of Large pro	B4DZ56;B0UX77;B0UZE9;P48634-1;P48634;B0UZL3;B4DLY2;B4DQ12;B5ME30;P48634-3;A6NG23;P48634-2;P48634-4	ENST00000376007;ENST00000376033;ENST00000383267;ENST00000383272;ENST00000383455;ENST00000383464;ENST00000376007;ENST00000376033;ENST00000376007;ENST00000376010;ENST00000383267;ENST00000383272;ENST00000383455;ENST00000383464;ENST00000376007;ENST00000376010;ENST00000383267;ENST00000383272;ENST00000383455;ENST00000383464;ENST00000376007;ENST00000376010;ENST00000383267;ENST00000383272;ENST00000383455…	PF07001;PF07001;PF07001;PF07001;PF07001;PF07001;PF07001;PF07001	BAT2_N;BAT2_N;BAT2_N;BAT2_N;BAT2_N;BAT2_N;BAT2_N;BAT2_N	BAT2 N-terminus;BAT2 N-terminus;BAT2 N-terminus;BAT2 N-terminus;BAT2 N-terminus;BAT2 N-terminus;BAT2 N-terminus;BAT2 N-terminus		GO:0005634;GO:0005737;GO:0043226;GO:0043227;GO:0043229;GO:0043231;GO:0044424;GO:0044464;GO:0005634;GO:0005737;GO:0043226;GO:0043227;GO:0043229;GO:0043231;GO:0044424;GO:0044464;GO:0005634;GO:0005737;GO:0043226;GO:0043227;GO:0043229;GO:0043231;GO:0044424;GO:0044464;GO:0016021;GO:0031224;GO:0044425;GO:0044464;GO:0005634;GO:0005737;GO:0043226;GO:0043227;GO:0043229;GO:0043231;GO:0044424;GO:0044464;GO:…	nucleus;cytoplasm;organelle;membrane-bounded organelle;intracellular organelle;intracellular membrane-bounded organelle;intracellular part;cell part;nucleus;cytoplasm;organelle;membrane-bounded organelle;intracellular organelle	GO:0005488;GO:0005515;GO:0005488;GO:0005515;GO:0005488;GO:0005515;GO:0005102;GO:0005126;GO:0005164;GO:0005488;GO:0005515;GO:0032813;GO:0005488;GO:0005515;GO:0005488;GO:0005515	binding;protein binding;binding;protein binding;binding;protein binding;receptor binding;cytokine receptor binding;tumor necrosis factor receptor binding;binding;protein binding;tumor necrosis factor receptor superfamily binding;binding;protein binding	GO:0001775;GO:0002036;GO:0002037;GO:0006917;GO:0007088;GO:0007154;GO:0007165;GO:0007242;GO:0007346;GO:0008285;GO:0009605;GO:0009612;GO:0009628;GO:0009966;GO:0009967;GO:0009987;GO:0010564;GO:0010627;GO:0010638;GO:0010646;GO:0010647;GO:0010740;GO:0010827;GO:0010829;GO:0010941;GO:0010942;GO:0012502;GO:0019722;GO:0019932;GO:0031644;GO:0031646;GO:0032879;GO:0032880;GO:0032890;GO:0032891;GO:0033043;GO:…	cell activation;regulation of L-glutamate transport;negative regulation of L-glutamate transport;induction of apoptosis;regulation of mitosis;cell communication;signal transduction;intracellular signaling cascade;regulation of mitotic cell cycle	hsa:7916;hsa:7916;hsa:7916;hsa:7916;hsa:7916				0.998146	30.5605	0.306331	0	1.26911e-05	47.99	108.77	0.998146	30.5605	1.15523e-11	55.13	131.77
650	210	210		645	702;703	2542	5913	o101004_RD463HCLSb_i45	4907	2540	5911	o100806_RD463HCLSa_45i	7993	IPI00872152;IPI00017659;IPI00844315	IPI00872152	IPI00872152	Capz-interacting protein;Protein kinase substrate CapZIP;RCSD domain-containing protein 1;Capz-interacting protein;Protein kinase substrate CapZIP;RCSD domain-containing protein 1	RCSD1;CAPZIP;RCSD1;CAPZIP	54 kDa protein;Isoform 1 of Capz-interacting protein;Isoform 2 of Capz-interacting protein	Q6JBY9-1;Q6JBY9;B1AK48;Q6JBY9-2;Q5TGW6	ENST00000361496;ENST00000367854;ENST00000367856;ENST00000361496;ENST00000367854;ENST00000367856	PF05177;PF05177	RCSD;RCSD	RCSD region;RCSD region								hsa:92241;hsa:92241				0.997598	26.8071	0.96193	15.0204	0.0032287	15.28	61.011	0.994598	23.2896	6.74852e-50	59.26	190.81	0.997598	26.8071
650	217	217		645	702;703	2543	5916	o101004_RD463HCLSb_i45	4769	2540	5911	o100806_RD463HCLSa_45i	7993	IPI00872152;IPI00017659;IPI00844315	IPI00872152	IPI00872152	Capz-interacting protein;Protein kinase substrate CapZIP;RCSD domain-containing protein 1;Capz-interacting protein;Protein kinase substrate CapZIP;RCSD domain-containing protein 1	RCSD1;CAPZIP;RCSD1;CAPZIP	54 kDa protein;Isoform 1 of Capz-interacting protein;Isoform 2 of Capz-interacting protein	Q6JBY9-1;Q6JBY9;B1AK48;Q6JBY9-2;Q5TGW6	ENST00000361496;ENST00000367854;ENST00000367856;ENST00000361496;ENST00000367854;ENST00000367856	PF05177;PF05177	RCSD;RCSD	RCSD region;RCSD region								hsa:92241;hsa:92241				0.835987	7.29136	0.448923	0	0.0032287	15.28	61.011	0.000354898	-34.4754	6.74852e-50	59.26	190.81	0.835987	7.29136
1881	276	276		5460;7799	5991;8661	30790	71799	o101004_RD463HCLSb_i41	6409	30786	71788	o100702_RD463HSLCi_41	9487	IPI00873875;IPI00294962;IPI00645893;IPI00477897;IPI00477285;IPI00873603;IPI00642395	IPI00873875	IPI00873875	SH3 domain-containing kinase-binding protein 1;Cbl-interacting protein of 85 kDa;Human Src family kinase-binding protein 1;CD2-binding protein 3;SH3-domain kinase binding protein 1;SH3 domain-containing kinase-binding protein 1;Cbl-interacting protein of 85 kDa;Human Src family kinase-binding protein 1;CD2-binding protein 3;SH3-domain kinase binding protein 1;Putative uncharacterized protein SH3K…	SH3KBP1;CIN85;SH3KBP1;RP11-345L8.1-004;SH3KBP1;CIN85;SH3KBP1;RP11-345L8.1-002;SH3KBP1;SH3KBP1;RP11-345L8.1-005	78 kDa protein;Isoform 1 of SH3 domain-containing kinase-binding protein 1;SH3-domain kinase binding protein 1;Isoform 2 of SH3 domain-containing kinase-binding protein 1;SH3-domain kinase binding protein 1;Putative uncharacterized protein SH3KBP1;SH3-doma	Q96B97-1;Q96B97;Q5JPT6;Q5JPT2;Q96B97-2;Q5JPT5;Q5VSN0;A8MTQ7;Q5JPT1	ENST00000379698;ENST00000379726;ENST00000397821;ENST00000379702;ENST00000397821;ENST00000379698;ENST00000379726;ENST00000397821;ENST00000379697;ENST00000397821;ENST00000397808;ENST00000397821;ENST00000379698;ENST00000397821	PF00018;PF00018;PF00018;PF00018;PF00018;PF00018	SH3_1;SH3_1;SH3_1;SH3_1;SH3_1;SH3_1	SH3 domain;SH3 domain;SH3 domain;SH3 domain;SH3 domain;SH3 domain	2BZ8;2K6D;2O2O;2BZ8;2K6D;2O2O	GO:0000267;GO:0005624;GO:0005626;GO:0005634;GO:0005829;GO:0005856;GO:0005912;GO:0005924;GO:0005925;GO:0012506;GO:0016020;GO:0019717;GO:0030054;GO:0030055;GO:0030659;GO:0031090;GO:0043226;GO:0043227;GO:0043228;GO:0043229;GO:0043231;GO:0043232;GO:0044422;GO:0044424;GO:0044425;GO:0044433;GO:0044444;GO:0044446;GO:0044459;GO:0044464;GO:0045202;GO:0070161;GO:0005737;GO:0044424;GO:0044464;GO:0000267;GO:…	cell fraction;membrane fraction;insoluble fraction;nucleus;cytosol;cytoskeleton;adherens junction;cell-substrate adherens junction;focal adhesion;vesicle membrane;membrane;synaptosome;cell junction;cell-substrate junction;cytoplasmic vesicle membrane	GO:0005488;GO:0005515;GO:0017124;GO:0019904;GO:0003824;GO:0016301;GO:0016740;GO:0016772;GO:0005488;GO:0005515;GO:0017124;GO:0019904;GO:0003824;GO:0016301;GO:0016740;GO:0016772;GO:0003824;GO:0016301;GO:0016740;GO:0016772	binding;protein binding;SH3 domain binding;protein domain specific binding;catalytic activity;kinase activity;transferase activity;transferase activity, transferring phosphorus-containing groups;binding;protein binding;SH3 domain binding	GO:0006810;GO:0006897;GO:0006915;GO:0007154;GO:0007267;GO:0008219;GO:0009987;GO:0010324;GO:0012501;GO:0016043;GO:0016044;GO:0016192;GO:0016265;GO:0051234;GO:0006810;GO:0006897;GO:0006915;GO:0007154;GO:0007267;GO:0008219;GO:0009987;GO:0010324;GO:0012501;GO:0016043;GO:0016044;GO:0016192;GO:0016265;GO:0051234	transport;endocytosis;apoptosis;cell communication;cell-cell signaling;cell death;cellular process;membrane invagination;programmed cell death;cellular component organization;membrane organization;vesicle-mediated transport;death	hsa:30011;hsa:30011				1	166.696	1	115.983	4.5802e-10	50.12	127.93						1	166.696
1215	75	75	Phosphoserine	4015;4016	4427;4428	16240	38379	o100702_RD463HSLCi_45	5876	16234	38362	o100702_RD463HSLCi_41	6314	IPI00879287;IPI00061989	IPI00879287	IPI00879287	Putative uncharacterized protein CDCA5;Sororin;Cell division cycle-associated protein 5;p35	CDCA5;CDCA5	Putative uncharacterized protein CDCA5;Sororin	B5MBX0;Q96FF9;A8K625;B3KSI5	ENST00000404147;ENST00000275517;ENST00000404147	PF09666;PF09666	Sororin;Sororin	Sororin protein;Sororin protein		GO:0005634;GO:0005737;GO:0043226;GO:0043227;GO:0043229;GO:0043231;GO:0044424;GO:0044464;GO:0005634;GO:0005737;GO:0043226;GO:0043227;GO:0043229;GO:0043231;GO:0044424;GO:0044464	nucleus;cytoplasm;organelle;membrane-bounded organelle;intracellular organelle;intracellular membrane-bounded organelle;intracellular part;cell part;nucleus;cytoplasm;organelle;membrane-bounded organelle;intracellular organelle	GO:0005488;GO:0005515;GO:0003682;GO:0005488;GO:0005515	binding;protein binding;chromatin binding;binding;protein binding	GO:0000280;GO:0006996;GO:0007067;GO:0009987;GO:0016043;GO:0022402;GO:0022403;GO:0048285;GO:0000082;GO:0006323;GO:0006996;GO:0007076;GO:0007080;GO:0009987;GO:0016043;GO:0022402;GO:0030261;GO:0051234;GO:0051276;GO:0051301;GO:0051303;GO:0051310;GO:0051649;GO:0051656	nuclear division;organelle organization;mitosis;cellular process;cellular component organization;cell cycle process;cell cycle phase;organelle fission;G1/S transition of mitotic cell cycle;DNA packaging;organelle organization	hsa:113130				1	63.9045	1	139.731	4.86774e-14	42.26	139.73	1	189.079	8.05525e-46	52.74	189.08	1	36.8688
1420	176	176	Phosphoserine	426;4106	465;4523	16581	39181	o100702_RD463HSLCi_37	6311	16583	39188	o100806_RD463HCLSa_37i	7631	IPI00910363;IPI00843958;IPI00852659;IPI00167909;IPI00843902	IPI00910363	IPI00910363	cDNA FLJ56458, highly similar to Homo sapiens echinoderm microtubule associated protein like 3 (EML3), mRNA;Echinoderm microtubule-associated protein-like 3;Echinoderm microtubule-associated protein-like 3;Echinoderm microtubule-associated protein-like 3	EML3;EML3;EML3	cDNA FLJ56458, highly similar to Homo sapiens echinoderm microtubule associated protein like 3 (EML3), mRNA;Isoform 2 of Echinoderm microtubule-associated protein-like 3;95 kDa protein;Isoform 1 of Echinoderm microtubule-associated protein-like 3;Isoform 3	B4DL97;Q32P44-2;Q32P44;Q32P44-1;Q32P44-3	ENST00000278845;ENST00000394776;ENST00000278845;ENST00000394773;ENST00000394776;ENST00000278845;ENST00000394773;ENST00000394776;ENST00000278845;ENST00000394773;ENST00000394776	PF03451;PF00400;PF03451;PF00400;PF03451;PF00400;PF03451;PF00400	HELP;WD40;HELP;WD40;HELP;WD40;HELP;WD40	HELP motif;WD domain, G-beta repeat;HELP motif;WD domain, G-beta repeat;HELP motif;WD domain, G-beta repeat;HELP motif;WD domain, G-beta repeat		GO:0005737;GO:0005874;GO:0044422;GO:0044424;GO:0044430;GO:0044446;GO:0044464;GO:0005737;GO:0005874;GO:0044422;GO:0044424;GO:0044430;GO:0044446;GO:0044464;GO:0005737;GO:0005874;GO:0044422;GO:0044424;GO:0044430;GO:0044446;GO:0044464	cytoplasm;microtubule;organelle part;intracellular part;cytoskeletal part;intracellular organelle part;cell part;cytoplasm;microtubule;organelle part;intracellular part;cytoskeletal part;intracellular organelle part;cell part;cytoplasm;microtubule	GO:0005488;GO:0005515;GO:0005488;GO:0005515;GO:0005488;GO:0005515	binding;protein binding;binding;protein binding;binding;protein binding			hsa:256364;hsa:256364;hsa:256364				0.99985	38.2307	0.936488	11.6865	8.63946e-08	54.6	112.01	0.996448	24.4795	9.76816e-49	73.85	193.4	0.997281	25.6445
[truncated: 149 more columns]
